# Supplementary material
Source: MDPI journal article supplement (https://www.mdpi.com/2073-4433/11/5/484)
Supplement: s1 [file s1]

Archive with 3 entries (2 files):
- atmosphere-755770 supplementary/
- atmosphere-755770 supplementary/atmosphere-755770 Table S1- data-sets.xls
- atmosphere-755770 supplementary/atmosphere-755770-supplementary maps and pictures.pdf
