# Supplementary material
Source: MDPI journal article supplement (https://www.mdpi.com/2073-4433/11/5/484)
Supplement: s1 [file s1 › atmosphere-755770 supplementary/atmosphere-755770 Table S1- data-sets.xls]

## Sheet: TS
BL = below detection limit
NA = not available
TS	PM (ug/m3)	sunset (ng/m3)			PIXE (ng/m3)																									IC (ng/m3)																	ICP (ng/m3)
date	PM	TC	EC	OC	Na	Mg	Al	Si	P	S	Cl	K	Ca	Ti	V	Cr	Mn	Fe	Ni	Cu	Zn	As	Se	Br	Rb	Sr	Zr	Mo	Pb	Na+	NH4+	K+	Mg2+	Ca2+	Cl-	NO2-	NO3-	SO42-	Ossal.	F-	Acet.	Glicol.	Prop.	Form.	MSA	Piruv.	Cd_s	Al_s	V_s
2010-03-20	NA	NA	NA	NA	NA	NA	NA	NA	NA	NA	NA	NA	NA	NA	NA	NA	NA	NA	NA	NA	NA	NA	NA	NA	NA	NA	NA	NA	NA	NA	NA	NA	NA	NA	NA	NA	NA	NA	NA	NA	NA	NA	NA	NA	NA	NA
2010-03-22	NA	NA	NA	NA	NA	NA	NA	NA	NA	NA	NA	NA	NA	NA	NA	NA	NA	NA	NA	NA	NA	NA	NA	NA	NA	NA	NA	NA	NA	NA	NA	NA	NA	NA	NA	NA	NA	NA	NA	NA	NA	NA	NA	NA	NA	NA
2010-03-24	NA	NA	NA	NA	NA	NA	NA	NA	NA	NA	NA	NA	NA	NA	NA	NA	NA	NA	NA	NA	NA	NA	NA	NA	NA	NA	NA	NA	NA	NA	NA	NA	NA	NA	NA	NA	NA	NA	NA	NA	NA	NA	NA	NA	NA	NA
2010-03-26	NA	NA	NA	NA	NA	NA	NA	NA	NA	NA	NA	NA	NA	NA	NA	NA	NA	NA	NA	NA	NA	NA	NA	NA	NA	NA	NA	NA	NA	NA	NA	NA	NA	NA	NA	NA	NA	NA	NA	NA	NA	NA	NA	NA	NA	NA
2010-03-28	NA	NA	NA	NA	NA	NA	NA	NA	NA	NA	NA	NA	NA	NA	NA	NA	NA	NA	NA	NA	NA	NA	NA	NA	NA	NA	NA	NA	NA	NA	NA	NA	NA	NA	NA	NA	NA	NA	NA	NA	NA	NA	NA	NA	NA	NA
2010-03-30	NA	NA	NA	NA	NA	NA	NA	NA	NA	NA	NA	NA	NA	NA	NA	NA	NA	NA	NA	NA	NA	NA	NA	NA	NA	NA	NA	NA	NA	NA	NA	NA	NA	NA	NA	NA	NA	NA	NA	NA	NA	NA	NA	NA	NA	NA
2010-04-01	NA	NA	NA	NA	NA	NA	NA	NA	NA	NA	NA	NA	NA	NA	NA	NA	NA	NA	NA	NA	NA	NA	NA	NA	NA	NA	NA	NA	NA	NA	NA	NA	NA	NA	NA	NA	NA	NA	NA	NA	NA	NA	NA	NA	NA	NA
2010-04-03	NA	NA	NA	NA	NA	NA	NA	NA	NA	NA	NA	NA	NA	NA	NA	NA	NA	NA	NA	NA	NA	NA	NA	NA	NA	NA	NA	NA	NA	NA	NA	NA	NA	NA	NA	NA	NA	NA	NA	NA	NA	NA	NA	NA	NA	NA
2010-04-05	NA	NA	NA	NA	NA	NA	NA	NA	NA	NA	NA	NA	NA	NA	NA	NA	NA	NA	NA	NA	NA	NA	NA	NA	NA	NA	NA	NA	NA	NA	NA	NA	NA	NA	NA	NA	NA	NA	NA	NA	NA	NA	NA	NA	NA	NA
2010-04-07	NA	NA	NA	NA	NA	NA	NA	NA	NA	NA	NA	NA	NA	NA	NA	NA	NA	NA	NA	NA	NA	NA	NA	NA	NA	NA	NA	NA	NA	NA	NA	NA	NA	NA	NA	NA	NA	NA	NA	NA	NA	NA	NA	NA	NA	NA
2010-04-09	NA	NA	NA	NA	NA	NA	NA	NA	NA	NA	NA	NA	NA	NA	NA	NA	NA	NA	NA	NA	NA	NA	NA	NA	NA	NA	NA	NA	NA	NA	NA	NA	NA	NA	NA	NA	NA	NA	NA	NA	NA	NA	NA	NA	NA	NA
2010-04-11	24.4541	15164.2	6481.61	8682.59	35.6059	20.9735	87.0843	261.701	BL	1248.78	16.763	213.408	209.522	11.6623	BL	3.9818	3.46284	386.717	2.03747	21.5351	23.7253	BL	BL	4.30198	BL	BL	5.44354	BL	6.41841	38.8972	1292.09	213.803	BL	238.474	10.6995	108.847	514.313	4509.2	211.813	0.467662	22.7286	29.641	BL	51.5543	24.8555	BL	0.195818	71.7005	1.29989
2010-04-13	27.3779	14144.8	6214.2	7930.55	36.5115	22.6122	72.4255	225.264	BL	2106.16	23.0745	207.446	156.131	11.1247	BL	2.27857	5.006	345.853	1.19129	21.8406	29.9393	BL	BL	5.86243	BL	3.84787	BL	BL	7.44057	36.6713	2151.95	191.408	BL	213.84	16.8596	23.3332	326.6	6859.04	231.188	1.02121	23.9857	35.168	BL	56.3176	26.4171	BL
2010-04-15	28.1953	15058.4	6552.75	8505.69	83.8831	39.1745	100.13	279.184	BL	2213.78	32.4976	288.591	203.283	11.3937	7.8848	3.14353	4.66194	304.795	2.47258	16.2943	28.89	BL	1.26389	5.6426	BL	BL	BL	BL	5.62921	82.6495	1863.05	252.729	BL	206.051	17.8003	26.6172	376.564	6279.29	198.161	0.579121	23.6121	33.891	BL	54.2331	38.7134	BL
2010-04-17	13.0526	NA	NA	NA	249.593	55.8443	33.651	116.331	BL	451.205	42.6061	78.5038	161.954	5.05396	BL	3.9562	2.3256	236.631	1.48776	14.7737	15.9087	BL	BL	4.00027	BL	BL	BL	BL	BL	246.956	253.124	48.4195	21.7574	85.5977	57.3452	BL	537.684	1055.38	62.4198	0.385907	4.58528	2.77708	BL	9.78852	26.9097	BL	0.0915219	32.1496	1.00676
2010-04-19	18.4197	13185.3	7433.43	5751.86	32.2869	21.1662	55.6325	226.228	BL	446.329	11.6905	93.9017	330.138	10.9882	BL	4.8766	4.80977	446.918	0.635376	25.6791	22.7162	BL	BL	2.35726	BL	BL	4.00096	BL	4.02284	27.5448	341.506	68.4782	22.4775	304.63	14.3658	BL	631.874	1310.64	95.4077	0.218174	7.99032	5.7293	BL	17.0028	19.0195	BL
2010-04-21	26.4491	15353.4	6866.24	8487.16	56.1924	62.3394	199.232	570.646	BL	1545.08	26.2414	145.838	506.142	25.3714	4.08552	3.12488	7.85883	512.79	1.49416	25.9112	33.7917	0.922022	BL	3.64436	BL	BL	BL	BL	BL	57.4599	1077.3	77.2097	24.7147	533.931	16.1002	BL	307.997	4054.28	135.506	0.942869	9.59302	7.85524	BL	21.8326	21.615	BL
2010-04-23	29.2633	19452.9	8865.46	10587.4	39.4679	48.2673	124.567	486.348	BL	933.374	28.9147	255.061	627.024	18.3745	BL	5.87572	8.1778	559.05	0.690044	32.5348	36.1833	0.731601	BL	3.71226	BL	2.81224	2.81381	BL	3.24032	32.657	481.113	199.365	25.6601	641.585	19.7865	BL	404.727	2665.14	143.788	0.667071	14.3247	13.7721	BL	28.5215	21.632	BL	0.172397	86.2986	0.723835
2010-04-25	20.6219	12772.9	5625.65	7147.3	29.6779	24.3784	63.3179	248.037	BL	1146.96	16.0685	151.589	308.671	9.30206	2.96645	5.94027	6.0506	461.272	1.35725	28.7292	31.5575	BL	BL	2.90239	BL	BL	8.83871	BL	3.81553	29.0511	891.081	117.889	15.1096	380.258	14.0963	9.82626	279.835	3359.76	145.306	0.424073	13.0246	13.3476	BL	27.2974	41.7825	BL
2010-04-27	31.094	20063.8	9147.41	10916.4	60.087	64.1124	220.337	662.586	BL	823.448	34.3966	225.011	662.164	25.728	BL	5.58952	7.98585	470.377	2.02924	23.6098	34.1402	BL	BL	6.15772	BL	BL	BL	BL	5.73869	37.2571	609.237	134.336	22.004	561.763	18.8094	1.27546	1515.47	2081.07	161.437	0.637804	14.3214	12.1764	BL	27.3424	32.4838	BL
2010-04-29	12.7665	7599.58	3460.21	4139.37	357.884	74.4978	60.2698	265.274	BL	243.931	404.626	60.5726	441.762	13.5844	BL	2.84889	2.07301	257.041	0	14.5317	15.8103	BL	BL	2.96939	BL	BL	BL	9.8907	BL	324.593	69.4171	26.1919	26.8583	224.128	362.189	BL	387.701	518.285	28.7456	0.562208	5.7619	5.50311	BL	11.049	16.3719	BL	0.0729801	47.1253	8.33458
2010-05-01	22.3787	14573	6451.11	8121.94	39.7541	29.7915	78.7053	301.676	BL	928.531	24.5725	149.945	306.044	11.4539	BL	5.20116	6.07472	515.596	0	31.3783	30.4268	BL	BL	3.4879	BL	BL	BL	BL	5.38134	24.4796	671.548	102.709	37.4683	416.779	18.4109	BL	283.113	2406.69	150.118	0.616407	19.6412	23.2856	BL	42.2005	17.3793	BL
2010-05-03	20.0805	12615	6560.31	6054.72	23.1307	22.1662	79.0026	316.192	8.29246	1027.71	15.984	114.958	287.294	14.9788	BL	2.69759	5.14517	395.491	0	24.2641	24.572	BL	BL	2.99998	BL	BL	BL	BL	4.21621	24.9262	773.407	69.9037	26.5003	302.559	15.5597	7.53686	212.177	2674.89	140.277	0.534329	17.7443	BL	BL	38.4319	17.4617	BL
2010-05-05	18.2036	16398.4	7305.78	9092.61	27.1703	22.8521	61.3186	279.887	BL	380.496	9.82099	66.2969	317.528	12.4149	BL	3.72014	4.27449	387.974	0.787223	22.9001	21.356	BL	BL	BL	BL	BL	BL	13.999	BL	11.8828	165.466	25.7657	5.11308	102.269	7.63423	47.4531	87.4731	623.575	46.1039	0.624848	6.12444	13.0263	BL	13.4643	6.52623	BL	0.0809386	52.3051	0.449155
2010-05-07	22.9132	14096.7	5344.19	8754.96	42.0446	34.853	93.2542	306.324	BL	1248.73	21.8382	164.564	377.746	7.0897	3.74099	4.24161	2.7431	270.97	2.46281	17.932	17.9536	BL	2.13039	BL	BL	6.34118	BL	BL	BL	48.4702	918.363	110.118	11.4184	406.996	22.3284	3.83267	325.662	3560.41	231.78	0.456315	15.1516	20.9504	BL	24.161	37.8581	BL
2010-05-09	19.7484	12088.7	4315.43	7773.23	57.1444	39.9578	91.0497	296.134	BL	1029.74	16.4207	195.177	406.483	10.5395	5.40776	BL	5.65609	386.95	1.11553	23.1957	24.3694	BL	BL	2.57606	BL	BL	BL	BL	6.40032	53.3696	604.686	122.925	12.7996	322.347	14.4069	11.0055	212.202	2608.95	161.238	0.418551	12.0717	17.3971	BL	20.301	38.627	BL
2010-05-11	19.2661	13256.9	5319.6	7937.26	53.9539	46.4439	117.776	423.748	BL	1038.66	18.4503	181.871	566.009	12.4186	BL	2.43047	6.51665	359.228	1.04634	20.5135	23.822	BL	BL	BL	BL	BL	BL	BL	4.59365	49.9521	650.102	130.298	15.2454	494.171	12.3567	102.401	235.632	3025.52	161.039	0.743105	13.3922	21.0304	BL	28.9893	28.9981	BL	0.148783	79.0626	2.23207
2010-05-13	NA	NA	NA	NA	NA	NA	NA	NA	NA	NA	NA	NA	NA	NA	NA	NA	NA	NA	NA	NA	NA	NA	NA	NA	NA	NA	NA	NA	NA	NA	NA	NA	NA	NA	NA	NA	NA	NA	NA	NA	NA	NA	NA	NA	NA	NA
2010-05-15	NA	NA	NA	NA	NA	NA	NA	NA	NA	NA	NA	NA	NA	NA	NA	NA	NA	NA	NA	NA	NA	NA	NA	NA	NA	NA	NA	NA	NA	NA	NA	NA	NA	NA	NA	NA	NA	NA	NA	NA	NA	NA	NA	NA	NA	NA
2010-05-17	NA	NA	NA	NA	NA	NA	NA	NA	NA	NA	NA	NA	NA	NA	NA	NA	NA	NA	NA	NA	NA	NA	NA	NA	NA	NA	NA	NA	NA	NA	NA	NA	NA	NA	NA	NA	NA	NA	NA	NA	NA	NA	NA	NA	NA	NA
2010-05-19	NA	NA	NA	NA	NA	NA	NA	NA	NA	NA	NA	NA	NA	NA	NA	NA	NA	NA	NA	NA	NA	NA	NA	NA	NA	NA	NA	NA	NA	NA	NA	NA	NA	NA	NA	NA	NA	NA	NA	NA	NA	NA	NA	NA	NA	NA
2010-05-21	NA	NA	NA	NA	NA	NA	NA	NA	NA	NA	NA	NA	NA	NA	NA	NA	NA	NA	NA	NA	NA	NA	NA	NA	NA	NA	NA	NA	NA	NA	NA	NA	NA	NA	NA	NA	NA	NA	NA	NA	NA	NA	NA	NA	NA	NA
2010-05-23	NA	NA	NA	NA	NA	NA	NA	NA	NA	NA	NA	NA	NA	NA	NA	NA	NA	NA	NA	NA	NA	NA	NA	NA	NA	NA	NA	NA	NA	NA	NA	NA	NA	NA	NA	NA	NA	NA	NA	NA	NA	NA	NA	NA	NA	NA
2010-05-25	NA	NA	NA	NA	NA	NA	NA	NA	NA	NA	NA	NA	NA	NA	NA	NA	NA	NA	NA	NA	NA	NA	NA	NA	NA	NA	NA	NA	NA	NA	NA	NA	NA	NA	NA	NA	NA	NA	NA	NA	NA	NA	NA	NA	NA	NA
2010-05-27	NA	NA	NA	NA	NA	NA	NA	NA	NA	NA	NA	NA	NA	NA	NA	NA	NA	NA	NA	NA	NA	NA	NA	NA	NA	NA	NA	NA	NA	NA	NA	NA	NA	NA	NA	NA	NA	NA	NA	NA	NA	NA	NA	NA	NA	NA
2010-05-29	15.7304	9590.48	4689.13	4903.59	47.7508	29.3299	79.6113	257.511	BL	491.271	16.1622	101.717	315.339	10.7385	BL	4.28074	3.37648	251.991	BL	13.3889	17.6488	BL	BL	BL	BL	BL	BL	BL	BL	74.3615	296.099	62.8154	10.6123	212.696	12.9739	11.9256	158.24	1355.39	121.368	0.529805	11.1657	13.2749	BL	15.8622	48.8204	BL
2010-05-31	16.3738	11965	6978.25	4986.79	22.0669	18.6945	22.6109	99.9506	BL	391.006	11.074	87.0553	126.975	7.05566	BL	BL	3.34246	246.976	1.18556	15.7669	14.2929	BL	BL	BL	BL	BL	BL	BL	BL	18.7403	289.904	53.1659	4.05773	106.876	5.08196	80.7281	183.688	871.62	99.6965	0.264676	8.49233	9.34061	BL	15.0611	32.0993	BL
2010-06-02	12.9536	8059.12	4410.89	3648.23	16.105	10.3056	11.3807	58.6009	BL	705.939	12.8154	42.7405	63.4357	BL	BL	BL	BL	136.816	BL	7.96721	9.41373	BL	BL	BL	BL	BL	BL	14.2098	BL	25.0151	544.594	26.4133	4.86615	112.6	9.54649	40.2001	86.3986	1644.18	73.6904	0.284041	9.52481	10.624	BL	15.9407	27.2747	BL	0.0980241	19.5494	0.584534
2010-06-04	18.1568	9500.75	4144.58	5356.17	132.362	33.995	32.017	105.592	BL	1530.21	16.4543	71.7784	101.35	10.5095	5.78447	BL	4.01243	153.361	1.55474	9.38777	15.2804	BL	BL	3.55897	BL	BL	BL	BL	BL	127.282	1281.08	56.3756	14.671	118.228	18.911	3.75762	170.524	3690.99	160.121	0.392207	13.6579	17.5171	BL	24.2688	85.3735	BL
2010-06-06	19.9253	8524.16	3913.3	4613.18	NA	NA	NA	NA	NA	NA	NA	NA	NA	NA	NA	NA	NA	NA	NA	NA	NA	NA	NA	NA	NA	NA	NA	NA	NA	482.814	893.022	96.6307	27.0363	228.314	61.4722	35.9623	476.568	3568.57	171.18	0.639602	9.23193	7.35939	BL	13.0181	88.6254	BL
2010-06-08	13.8208	8291.91	4907.18	3384.73	165.489	42.6266	43.5661	142.446	BL	697.162	12.3887	75.5707	176.929	BL	3.59414	BL	3.89729	236.113	1.69492	15.823	15.2391	BL	BL	2.4645	BL	BL	BL	BL	7.6621	170.124	517.418	64.6818	16.0853	152.077	5.58461	5.11712	201.215	1887.87	102.751	0.301707	7.46536	4.55399	BL	6.53325	59.4166	BL	0.0537441	31.3913	1.09618
2010-06-10	16.6739	8699.72	4643.88	4055.84	249.052	53.2107	51.5464	185.72	BL	1115.57	13.2189	91.4856	220.015	10.03	6.00593	2.94878	2.84593	263.563	2.30979	16.3047	17.7229	1.78869	BL	3.41352	BL	BL	BL	BL	BL	278.58	961.79	80.1518	19.5038	215.928	11.4097	113.043	344.669	3278.46	157.237	0.651555	10.3623	8.18639	BL	15.5535	135.565	BL
2010-06-12	19.0264	9769.26	4705.47	5063.8	359.882	56.1603	50.39	144.369	BL	1007.83	34.4438	105.048	158.619	BL	BL	BL	4.19135	271.159	3.12291	20.3334	23.9333	BL	BL	6.11783	BL	BL	BL	BL	BL	537.633	744.192	93.0334	23.7574	164.133	34.4776	BL	391.993	2977.99	181.997	0.690873	12.9935	11.4879	BL	16.9311	89.0635	BL
2010-06-14	17.7136	8294.27	3364.27	4930	161.539	49.2523	64.962	207.015	10.3103	1322.24	20.7853	95.5376	263.949	6.79423	4.68175	3.27996	4.45128	268.876	2.44716	15.4871	14.9648	BL	BL	5.91695	BL	BL	BL	BL	BL	197.429	1063.87	82.3651	16.2273	249.548	16.533	2.49713	180.829	3618.01	204.65	0.453495	15.2545	15.1123	10.0917	22.4018	74.8029	BL	0.107755	45.5433	2.16534
2010-06-16	15.2662	8565.23	3726.95	4838.29	105.235	24.8062	30.1608	124.616	BL	1074.17	8.69229	106.166	112.627	BL	BL	2.69297	2.91637	175.909	1.5306	11.4504	12.7635	BL	BL	2.72117	BL	BL	BL	BL	BL	142.08	1085.34	115.223	10.7813	134.205	13.3309	BL	117.621	3458.93	151.09	0.493274	11.7984	11.5056	BL	15.6577	84.8784	BL
2010-06-18	19.1035	12350.3	6663.4	5689.23	60.5341	13.3752	49.4086	144.407	BL	984.302	15.7523	94.9164	108.371	6.12338	BL	BL	2.14693	244.793	1.64199	16.3567	17.2371	BL	BL	4.18632	BL	BL	BL	BL	BL	77.6091	1082.83	95.452	8.49203	130.834	10.613	52.2777	147.711	3251.69	171.336	0.831329	18.5422	18.4745	BL	33.8284	92.2662	BL
2010-06-20	16.068	10217	6258.57	3958.41	48.8805	27.7444	48.6008	148.15	BL	780.881	9.75938	60.1835	121.597	BL	BL	4.46953	3.70031	220.152	1.57589	14.2414	15.0537	BL	BL	2.33951	BL	BL	BL	BL	BL	38.8731	460.275	35.6123	3.991	45.362	9.16778	6.82361	66.398	1265.21	48.301	0.326624	6.67695	5.31197	BL	7.61532	32.9549	BL	0.0645419	25.4456	1.05696
2010-06-22	15.5253	10477.9	6124.89	4353	51.4888	17.1229	23.752	76.8844	BL	670.993	14.3931	62.1749	82.2954	BL	BL	BL	2.91363	189.495	1.06822	13.1337	13.6736	BL	BL	BL	BL	BL	BL	BL	BL	41.2458	548.334	45.5431	11.5542	78.2527	5.93858	76.8625	149.342	1475.62	74.2718	0.342171	10.2697	9.59759	BL	16.6353	70.4182	BL
2010-06-24	12.0889	8340.01	3533.36	4806.66	39.8556	29.8428	70.9434	156.957	7.73566	319.699	9.73467	287.065	190.181	9.5505	BL	2.78095	5.23334	315.515	1.39747	23.1758	23.0227	BL	0.900367	BL	1.65823	BL	BL	BL	BL	21.2609	43.4303	107.027	17.2232	70.1402	3.10447	1.23533	71.0061	437.505	49.1952	0.264367	4.70568	3.21665	BL	3.42425	10.4922	BL
2010-06-26	28.1156	15919	7211.83	8707.13	97.7655	45.967	79.8568	257.52	5.61553	1259.06	11.5036	88.3049	351.198	12.3488	3.6658	4.21902	7.3908	443.843	1.96225	29.3885	30.9445	BL	BL	BL	BL	BL	BL	BL	5.08036	128.624	853.249	59.3969	117.535	295.391	8.24539	BL	442.126	2907.35	221.091	0.213308	9.30778	6.16689	BL	9.1189	93.4655	BL	0.161345	60.0437	2.30937
2010-06-28	15.2725	7004.15	3096.43	3910.05	64.4211	20.0916	45.7291	107.302	7.64873	1206	BL	109.715	109.529	6.41679	2.73322	1.92027	2.47935	208.771	1.53831	13.6926	16.2516	BL	BL	0.999893	1.4172	BL	BL	BL	3.09813	64.4218	1035.33	84.6065	128.769	136.141	7.14128	3.89562	106.063	3022.49	148.406	0.349637	10.4276	10.4987	BL	12.505	52.6068	BL
2010-06-30	24.4175	13030.9	6822.36	6206.16	48.6006	21.5952	58.7216	162.118	BL	1659.52	9.78605	97.1216	156.854	7.64997	3.45699	5.16093	5.04803	379.185	1.81081	26.0337	25.7968	BL	1.27396	BL	2.26864	BL	BL	BL	BL	42.9767	1068.08	65.3767	116.822	133.222	11.2428	1.36929	80.2222	3203.74	149.747	0.359397	10.8333	9.19607	BL	11.0224	36.415	BL
2010-07-02	24.9098	13871.3	7046.1	6825.18	25.4289	25.3696	75.1992	216.697	BL	1463.42	7.03857	129.155	204.354	7.06683	2.14812	4.38942	5.37317	378.685	1.5167	26.4649	27.7119	BL	1.95721	1.3978	4.33695	BL	BL	BL	BL	25.1754	940.74	81.355	39.0798	188.789	11.787	BL	92.3838	3045.95	157.537	0.32656	12.3176	11.8637	BL	13.5493	17.8799	BL	1.21986	58.4778	1.00727
2010-07-04	24.4072	7729.36	3129.88	4599.48	47.3232	23.702	34.6993	120.536	BL	2440.99	BL	78.6533	88.0697	4.16386	6.70352	BL	3.6124	188.249	2.72406	12.5939	18.9757	BL	1.44926	1.43013	2.87418	BL	BL	BL	BL	55.5672	2008.6	65.9385	28.8768	114.893	16.0741	BL	92.1025	6054.01	241.109	0.621662	15.4358	20.7637	BL	22.6538	74.4946	BL
2010-07-06	20.4464	10631	5413.15	5215.5	59.0359	13.0508	34.0754	109.54	BL	1389.99	8.77757	64.9894	120.859	3.23867	2.85974	2.80452	2.32086	197.135	1.99466	13.7138	22.1125	BL	BL	2.1926	BL	BL	BL	BL	4.25717	80.7969	1221.02	61.2816	35.187	103.091	6.69474	19.7258	83.7658	3721.18	191.514	1.40321	15.1366	15.7223	BL	28.2224	46.4812	BL
2010-07-08	11.3394	4837.01	2013.87	2823.14	463.906	77.463	32.7611	89.989	BL	592.484	21.7224	46.677	118.584	BL	BL	BL	BL	128.115	1.56481	9.42805	11.8968	BL	BL	BL	BL	BL	BL	BL	2.04582	176.961	119.311	33.8939	13.5031	17.3133	25.1923	19.7194	236.295	462.961	43.7876	0.221681	2.03719	2.65219	BL	4.25043	37.3832	BL	3.08168	35.345	2.14203
2010-07-10	14.7874	7510.43	3680.13	3830.3	247.522	50.1654	34.5038	121.148	BL	928.023	10.5224	65.3216	142.903	6.17045	3.26139	1.61765	2.86667	213.175	1.72267	14.583	13.6475	BL	BL	1.26317	BL	BL	BL	BL	BL	259.025	517.889	57.0826	25.5708	90.8571	5.32912	5.90286	174.251	1588.88	100.549	0.257318	6.98215	6.09446	BL	9.46118	105.59	BL
2010-07-12	12.362	5810.93	2206.3	3606.94	99.0513	20.5351	28.4994	96.9958	BL	892.839	8.30307	72.7256	107.727	4.16065	BL	2.02591	2.35375	152.076	1.67998	10.3854	13.7639	BL	1.28041	BL	BL	BL	BL	BL	BL	85.2489	569.724	56.4253	16.5942	81.9059	5.9207	20.0624	79.9492	1441.33	108.608	0.228587	7.92186	9.1954	BL	11.2947	59.0658	BL
2010-07-14	21.252	11387.1	5357.54	6029.55	89.3247	20.5482	44.1768	138.62	9.14045	1284.58	14.0354	519.585	152.632	5.80908	4.6254	3.42282	4.32582	253.331	3.09502	17.8706	19.9747	BL	BL	3.01876	BL	BL	BL	BL	3.2567	142.821	857.651	389.251	21.7021	146.117	8.57315	82.8942	152.464	2536.23	166.273	0.552005	12.5906	11.9341	BL	21.2029	88.3662	BL	0.13544	35.3993	2.82205
2010-07-16	20.3338	10127.9	4755.8	5369.75	82.5599	30.1184	99.2755	268.427	BL	1299.35	11.5993	140.366	190.387	9.25472	3.92265	2.76502	4.16799	264.222	1.93946	15.9255	14.8151	0.828775	1.32201	3.68168	BL	BL	BL	BL	BL	108.821	926.839	118.783	25.2279	156.291	10.7667	42.7298	92.594	2695.57	168.481	0.309742	9.56117	9.92197	BL	18.6927	72.7241	BL
2010-07-18	7.9924	3941.92	1251.18	2693.06	317.202	55.0211	31.5402	96.4034	4.80982	333.943	183.07	46.3986	100.122	3.13353	BL	1.34971	1.532	83.6094	BL	4.71614	4.29209	BL	BL	1.41996	BL	BL	BL	BL	1.26775	181.402	139.58	27.8282	19.1634	42.6868	102.894	2.27613	176.322	589.904	31.1478	0.317493	2.61685	BL	BL	4.07506	22.8533	BL
2010-07-20	12.6639	7254.47	3497.03	3757.44	207.6	24.6022	19.3549	82.091	BL	887.322	13.136	51.5939	77.5472	BL	3.07834	1.63783	1.66983	140.871	1.77174	9.74255	9.40508	BL	BL	3.23969	BL	BL	BL	4.65187	1.72844	199.331	592.364	47.3399	34.6898	99.2428	14.6675	3.86462	79.325	1792.43	123.02	0.210795	7.02727	7.28766	BL	10.6376	61.1206	BL	0.102267	27.8035	2.05886
2010-07-22	16.2571	9345.63	4467.02	4878.61	72.7139	29.4686	61.9396	155.486	BL	1034.43	16.288	131.304	120.511	4.08243	3.70368	2.86548	3.85496	218.179	2.4284	14.5754	15.7692	BL	0.789928	3.9511	BL	BL	BL	BL	3.1383	93.3541	726.205	87.2234	34.4887	131.429	8.55787	123.668	126.965	2035.95	165.92	0.59008	12.361	12.6416	BL	27.0332	43.6332	BL
2010-07-24	20.3451	8734.37	3681.18	5050.87	231.501	70.8765	151.173	375.65	BL	1129.2	22.553	283.04	258.886	13.8728	4.92408	3.77245	4.42557	258.948	2.60253	15.1027	23.0379	1.53862	1.08665	6.2949	BL	BL	BL	BL	BL	273.99	661.105	173.601	41.2464	234.355	8.9185	80.6018	190.283	2480.76	230.908	0.56349	13.2879	12.4542	BL	27.2238	63.2514	BL
2010-07-26	13.4858	7544.98	3685.3	3859.68	114.054	30.9963	51.0876	146.417	BL	598.482	12.5519	79.2758	145.309	5.74038	2.93599	3.31474	2.59822	283.35	1.54766	20.6742	12.6236	BL	BL	2.20906	BL	BL	BL	BL	1.36922	125.757	392.118	55.8194	27.6352	125.546	5.36601	15.1436	131.004	1344.34	128.357	0.262846	7.0725	7.22395	BL	9.94411	37.1262	BL
2010-07-28	18.8967	9200.3	4421.07	4779.22	107.833	54.7266	125.733	382.266	BL	927.493	8.73992	131.066	351.235	12.6161	3.91613	4.09301	1.49976	341.004	1.58173	22.1808	18.711	BL	BL	3.50073	BL	2.26786	3.09491	BL	3.01309	107.399	563.629	78.7942	33.6797	269.707	7.31583	2.92871	129.804	2028.76	186.536	0.316314	8.31501	8.29087	BL	11.0007	31.1233	BL	0.088509	72.3573	3.43609
2010-07-30	21.6793	10839.7	4534.95	6304.74	91.1116	44.9933	129.999	366.235	BL	1185.2	16.656	114.222	348.104	12.0203	5.6033	3.6012	5.93603	351.881	2.70322	22.5828	18.9186	BL	1.13001	4.30087	BL	BL	BL	BL	2.59638	84.3431	852.688	71.5988	31.0926	324.161	9.94411	4.27738	120.812	2621.72	198.354	0.378092	12.8804	11.9106	BL	16.7685	37.8607	BL
2010-08-01	17.1767	8682.15	3832.89	4849.26	146.814	41.8649	88.9965	261.787	BL	1003.49	19.3582	90.3435	306.281	8.87892	2.90969	3.0217	4.52432	305.085	2.78822	18.1991	15.7166	BL	0.711033	3.80231	BL	2.02227	BL	BL	2.03602	132.671	641.491	55.4367	29.9416	263.668	12.2745	1.91584	139.899	2139.63	170.071	0.351349	10.8496	10.276	BL	13.5335	41.2167	BL
2010-08-03	18.3737	10718	5432.24	5285.74	119.71	43.7069	97.5581	288.137	BL	1138.02	15.9568	84.4953	340.395	11.9565	4.24782	2.44534	5.21292	309.781	2.81792	19.6305	20.5937	0.522364	0.45012	2.14291	BL	BL	BL	BL	BL	108.779	739.029	61.2496	26.6369	281.345	14.7091	104.562	129.095	2412.51	142.088	0.183927	7.62615	6.94605	BL	16.9711	55.2861	BL	0.144112	48.251	3.35097
2010-08-05	NA	NA	NA	NA	NA	NA	NA	NA	NA	NA	NA	NA	NA	NA	NA	NA	NA	NA	NA	NA	NA	NA	NA	NA	NA	NA	NA	NA	NA	NA	NA	NA	NA	NA	NA	NA	NA	NA	NA	NA	NA	NA	NA	NA	NA	NA
2010-08-07	17.3362	9194.14	4204.1	4987.72	37.665	34.4203	75.9724	222.394	BL	1050.2	9.99291	102.099	278.958	7.12434	2.85534	3.79765	4.50836	323.631	1.1558	21.6298	19.1014	BL	0.574201	2.15445	BL	BL	BL	BL	3.14928	31.3037	673.133	58.241	11.7187	183.303	6.07859	114.473	60.0205	2473.14	194.707	0.280357	9.83319	9.16966	BL	12.1905	22.2853	BL
2010-08-09	15.0404	8432.07	3841.64	4592.76	18.2371	16.6412	34.7186	109.708	BL	982.325	8.77501	75.9943	101.687	4.86552	BL	BL	3.67608	218.16	0.643079	14.3152	13.379	BL	0.563629	1.84185	BL	BL	BL	BL	2.8725	18.3895	721.817	46.1277	6.24981	99.6221	7.30097	BL	28.1824	2266.33	171.054	0.172892	8.45928	7.92937	BL	8.582	17.1342	BL	0.127934	27.3078	1.34048
2010-08-11	17.5923	7913.06	3671.68	4239.06	64.5553	17.5587	30.1233	84.7475	BL	1744.98	17.4778	78.2564	71.5255	3.55842	5.42062	1.9468	2.02652	191.034	2.2583	13.5345	11.1538	BL	1.18	1.95849	BL	BL	BL	BL	1.92427	59.3683	1249.13	60.4056	8.57582	73.9233	6.25236	BL	43.8364	4219.38	191.397	BL	BL	BL	BL	12.3678	42.496	BL
2010-08-13	17.0248	8051.57	3421.1	4630.47	46.4309	15.9757	29.8515	91.9205	BL	1445.01	22.2345	91.5129	79.0825	BL	BL	1.82577	BL	157.912	1.24901	11.344	9.34035	BL	BL	2.12247	BL	BL	BL	BL	BL	54.055	1076.72	70.6558	5.54953	68.5182	14.3992	0.975626	45.6796	3506.2	173.795	0.226145	8.54378	7.06474	BL	9.39944	27.6744	BL
2010-08-15	14.113	5573.49	1985.71	3587.77	41.9654	13.1372	31.384	97.8802	BL	1373.4	BL	67.9554	55.9928	BL	4.79059	BL	1.40282	112.573	1.62613	7.31451	6.30789	BL	BL	2.66958	BL	BL	BL	BL	BL	53.1997	1064.8	61.6012	5.1795	49.0809	7.41672	28.1829	59.3899	3424.89	135.976	0.257624	8.64078	7.68454	BL	12.7054	34.2932	BL	0.109477	20.8399	3.56196
2010-08-17	15.5858	9081.36	4965.1	4116.26	33.004	19.5355	73.7718	176.299	BL	1100.45	19.4817	121.749	93.9949	6.78965	2.70576	3.95708	1.71525	231.788	1.34574	13.8452	11.9548	BL	BL	3.24279	BL	BL	BL	4.27046	1.26235	84.0026	807.083	97.1584	7.85766	63.9673	43.5202	BL	46.718	2643.62	176.033	0.283836	8.93469	7.61842	BL	8.64476	21.0698	BL
2010-08-19	15.667	9238.18	4847.02	4391.16	33.5877	24.6204	101.801	221.148	BL	874.309	13.5531	91.0206	86.7177	7.1894	4.70185	1.91884	3.05691	244.319	1.19018	15.3788	11.9576	BL	BL	2.06593	BL	BL	BL	BL	2.07956	35.3118	732.979	67.4015	6.90555	73.9492	6.72211	BL	48.464	2274.2	216.45	0.229571	10.5934	9.86589	BL	8.12562	19.2556	BL
2010-08-21	17.9068	8074.68	3286.15	4788.53	71.7248	30.3239	101.414	250.352	BL	1133.99	15.3428	226.21	124.602	8.92783	2.83451	2.3012	2.92228	239.45	1.4924	14.08	16.6912	BL	0.888712	0.906781	1.62545	BL	BL	BL	BL	33.8078	997.273	109.959	BL	66.2687	7.7584	2.55787	71.8284	2771.91	192.624	0.266857	11.5493	13.9448	BL	17.3262	16.2786	BL	0.146552	52.7974	2.64335
2010-08-23	18.2923	7669.46	3525.44	4144.02	151.495	43.9319	70.9035	194.056	BL	1599.61	6.67947	117.578	154.717	7.43713	2.75186	BL	2.87219	227.06	1.55602	13.7365	15.9028	BL	BL	BL	BL	BL	BL	BL	2.3061	146.772	1315.73	76.7802	21.163	118.147	11.9687	26.9487	97.333	4046.72	209.652	0.348946	10.5364	14.5772	BL	19.8699	49.6733	BL
2010-08-25	17.7553	7621.18	3441.97	4179.2	70.8846	15.3292	47.4135	133.723	BL	1145.38	16.5614	94.3083	94.8599	6.50962	2.82143	2.06094	3.09189	227.445	1.88926	16.5811	17.4959	BL	BL	BL	BL	BL	BL	BL	3.69898	142.541	1277.58	91.3199	BL	88.1011	87.2637	16.1279	83.5713	3546.81	184.817	BL	8.47336	15.285	BL	19.2241	47.2251	BL
2010-08-27	20.4937	9880.28	5134.3	4745.98	52.1134	34.5091	88.699	238.158	BL	1433.52	10.8298	140.731	107.048	4.58891	4.20154	2.60837	1.51699	253.725	1.65554	15.3632	15.0395	BL	BL	BL	BL	BL	BL	BL	3.11131	117.4	1535.34	119.212	BL	106.377	74.1992	26.8911	78.7329	4408.81	165.862	BL	8.73215	12.3687	BL	22.668	43.9997	BL	0.125719	42.4734	2.79655
2010-08-29	18.6116	7022.85	3285.85	3736.99	104.859	29.9313	94.4487	195.857	BL	2209.68	10.7662	180.42	77.6748	7.65833	6.29649	2.15642	1.55267	192.235	2.91394	11.4742	13.7452	BL	BL	BL	3.46202	BL	BL	BL	BL	98.1631	1738.69	106.322	BL	74.8416	21.6604	15.0915	62.2239	5072.33	145.99	0.415995	6.91422	9.00944	BL	14.2347	46.4057	BL
2010-08-31	15.9669	10856	5695.43	4695.42	114.441	20.0592	24.8562	91.0507	BL	639.415	13.3265	93.7874	72.1692	4.61087	BL	2.8673	2.53723	224.223	0.914543	16.8702	16.7494	BL	BL	BL	BL	BL	BL	BL	1.66272	107.832	582.894	60.593	13.8636	52.5009	20.6209	5.52527	90.9275	1790.91	140.364	0.37631	7.47958	7.69289	BL	10.9036	53.0356	BL
2010-09-02	20.1698	9420.38	5411.31	4009.07	127.5	24.6912	56.5801	135.27	BL	1773.35	16.6637	169.429	79.7224	5.67402	3.60481	BL	1.37294	162.274	1.79849	11.061	15.4536	BL	BL	BL	BL	BL	BL	BL	3.66699	117.078	1566.35	112.073	17.1148	65.153	14.7145	4.47391	69.443	4693.83	141.209	0.375426	4.3807	5.43899	BL	9.94971	56.9975	BL	0.5532	26.6789	3.4184
2010-09-04	11.7319	6030.21	3027.9	3002.31	239.751	37.1519	25.274	84.4506	6.014	1055.28	14.6485	62.2962	56.7	BL	BL	1.85968	1.96687	109.065	1.18401	7.74998	11.1105	BL	0.85265	BL	BL	BL	BL	BL	BL	174.603	789.777	34.7124	16.1824	42.7985	5.2096	29.5912	80.1634	2352.24	93.6705	0.259919	4.16331	4.67407	BL	9.95348	41.2144	BL
2010-09-06	9.60991	7203.08	4660.95	2539.8	61.9669	19.8379	11.3633	54.9369	BL	395.359	5.03387	29.2004	43.6209	2.71526	1.92846	1.76253	BL	141.803	BL	9.92061	11.2301	BL	BL	BL	2.2478	BL	BL	BL	BL	45.4004	299.695	15.4319	9.46106	26.6	5.69877	84.1949	84.5567	885.992	51.4892	0.216169	4.30656	3.98851	BL	10.8219	15.3526	BL
2010-09-08	17.8776	12518.1	6583.46	5932.32	73.7474	23.6595	39.5205	131.024	6.90271	653.988	5.70231	81.7948	159.44	5.90262	BL	3.12981	2.90156	297.905	0.59973	21.8998	29.3288	0.642841	1.34795	BL	3.09426	BL	BL	BL	BL	52.5993	346.246	43.5894	11.1382	41.8726	13.666	5.10874	124.624	1231.14	101.885	0.229083	6.1443	2.89658	BL	7.74501	16.17	BL	0.102426	26.3789	1.15127
2010-09-10	23.3787	13787.8	7582.88	6127.21	42.7894	21.5391	55.0106	153.674	5.58653	1125.87	5.9644	154.409	134.566	6.22933	BL	2.55972	4.62274	295.724	0.556752	21.6127	24.7079	BL	2.19978	BL	2.25891	BL	BL	BL	BL	39.2252	899.189	103.542	BL	100.586	14.4338	BL	118.962	2608.49	149.392	0.210525	10.5164	5.54852	BL	10.7447	20.0058	BL
2010-09-12	23.5014	11731.1	5261.82	6467.11	42.2328	17.7384	45.182	139.724	BL	1396.58	BL	206.997	98.4949	4.76816	BL	1.66367	4.56564	250.992	1.02954	15.8935	25.5733	BL	2.05356	BL	BL	BL	BL	BL	2.81967	45.5889	1383.76	176.828	BL	102.387	14.8857	BL	111.625	4037.97	181.427	0.215676	13.4636	8.68803	BL	13.665	20.9712	BL
2010-09-14	24.699	13165.8	5541.92	7621.75	30.5118	21.4947	48.5281	112.57	BL	1346.77	10.6184	273.202	110.343	5.96755	BL	1.67178	3.2483	187.182	0.678871	14.4431	26.8192	BL	BL	1.1596	BL	BL	BL	BL	9.81174	24.7166	1216.05	204.412	BL	92.893	17.2612	BL	444.147	3457.52	164.588	0.192247	12.1314	6.39221	BL	13.2694	12.4711	BL	1.92689	18.8989	0.887335
2010-09-16	20.9649	13869.7	7701.52	6170.29	34.4528	18.936	48.8661	141.034	BL	521.458	10.6786	94.5154	143.809	5.54193	BL	2.3749	2.27362	207.082	0.515461	15.4287	23.6747	BL	BL	BL	BL	BL	BL	45.8401	5.54284	7.81534	100.762	23.6361	BL	17.2539	16.0102	BL	87.6352	536.58	25.0471	0.165649	3.91478	2.03902	BL	BL	4.43262	BL
2010-09-18	19.2804	11494.7	6236.45	5258.22	57.3938	15.4699	37.7416	113.642	5.8971	633.368	12.1448	97.7578	123.795	5.92607	BL	4.32054	3.81547	310.004	1.82239	21.294	20.0356	BL	BL	BL	BL	BL	BL	BL	2.04652	49.9015	520.508	75.2798	BL	105.192	14.0157	BL	141.54	1629.49	137.266	0.148942	10.1654	4.28105	BL	10.7248	17.9728	BL
2010-09-20	15.7004	9064.79	5097.19	3969.76	42.9259	17.1584	30.5369	82.3605	6.12173	781.42	9.34862	97.3321	80.2714	4.87125	BL	1.81997	3.00055	223.985	0.583043	14.5638	17.8276	BL	1.30373	BL	3.48032	1.42442	BL	BL	BL	28.9962	689.426	72.5106	BL	69.804	11.4991	BL	183.053	1793.63	95.1495	0.255905	9.74346	5.28137	BL	11.8721	13.9912	BL	0.164242	14.6237	0.843207
2010-09-22	37.1002	11495.7	7528.47	6159.27	34.7722	17.0945	60.5184	183.814	9.42272	4199.74	13.5747	225.224	208.052	5.76067	BL	3.17685	7.11847	295.416	1.27441	21.3897	33.7446	BL	1.45338	BL	BL	BL	BL	BL	6.66513	15.5781	2073.89	123.069	BL	166.388	16.9766	BL	174.76	5965.52	119.028	0.564211	14.2352	13.6239	BL	26.1653	13.8769	BL
2010-09-24	32.4815	13966.6	7984.3	5984.45	17.4673	18.2068	50.8545	189.316	BL	2701.9	12.0549	198.984	230.542	8.19099	BL	3.41607	5.75874	280.227	0.902032	20.7792	25.6004	1.6601	BL	3.1062	BL	BL	BL	BL	BL	11.6386	1364.14	95.7335	13.5033	59.8692	26.8028	3.04209	78.1251	5229.03	54.3349	0.844655	5.89868	8.32898	BL	10.7725	12.2771	BL
2010-09-26	22.4876	13061.4	4157.29	8902	73.4385	23.1423	41.6371	144.733	BL	1646.81	13.3956	131.647	155.096	6.18201	BL	2.60366	3.41102	232.252	0.875296	14.7342	21.5213	BL	BL	3.49554	BL	BL	BL	6.103	6.35809	49.9552	942.67	66.1577	12.1309	67.1819	26.6997	BL	81.0605	3377.62	60.1873	0.422258	5.98192	6.79357	BL	9.54756	24.8476	BL	0.126107	25.3365	1.52024
2010-09-28	32.1212	18010.6	8720.17	9290.43	43.5322	18.209	51.8318	182.966	BL	2525.98	14.1875	282.593	195.611	5.43964	BL	4.37279	3.85221	272.22	1.37634	19.5992	31.3649	2.94115	BL	4.62816	BL	BL	BL	BL	3.55813	41.4615	1630.6	174.057	16.4873	142.481	32.199	1.37226	149.742	6470.83	118.142	1.04003	10.7771	16.2296	BL	17.7765	22.243	BL
2010-09-30	31.6656	14051.1	1539.87	12511.2	50.9321	17.585	42.4667	142.857	BL	3434.52	19.112	302.13	110.782	4.37457	4.06212	2.44712	3.6561	204.918	3.23013	15.5394	29.6686	1.22529	1.10116	3.74842	BL	BL	BL	BL	7.14794	38.5219	2720.41	198.769	12.676	126.186	40.2467	BL	250.971	9638.52	158.479	0.724445	9.05227	10.3496	BL	15.5956	25.9448	BL
2010-10-02	27.6124	17011.4	5600.64	11410.8	40.6014	17.8114	55.0856	148.452	6.8056	1846.42	10.0401	228.395	92.5596	7.52064	BL	3.08868	3.32736	223.126	1.44579	14.6399	22.4689	1.40008	1.20383	2.99612	BL	BL	BL	5.13692	BL	11.804	504.271	45.769	2.55178	13.392	14.3099	BL	77.0381	1790.96	35.1238	0.286893	4.00629	2.59519	BL	5.30565	13.3005	BL	0.197529	32.03	1.64423
2010-10-04	16.2153	9953.38	3835.37	6118.01	32.7403	14.246	21.8104	74.8437	BL	1140.63	BL	129.621	76.1742	BL	BL	BL	2.7808	151.072	1.20371	10.8097	16.1668	0.893957	BL	2.47455	BL	BL	BL	BL	1.72141	29.4184	897.771	73.4894	6.08693	54.9714	18.6457	BL	486.148	2996.32	91.4054	0.157823	6.54688	3.56658	BL	8.20036	26.0024	BL
2010-10-06	25.4372	17132.4	4122.74	12985.9	48.0729	13.1008	30.9991	102.669	6.14871	1262.75	14.1257	178.378	90.7974	5.05578	BL	3.05711	2.97044	214.165	1.98702	16.1041	31.4479	0.862714	BL	5.59676	BL	2.19373	BL	BL	5.82378	41.2028	1009.98	112.417	8.73927	82.71	22.6135	BL	418.788	3596.76	128.073	1.06924	10.407	9.34319	BL	14.7051	36.555	BL
2010-10-08	27.4298	16595.2	5086.76	11506.2	38.4411	BL	25.8577	83.4492	BL	1606.73	21.1891	219.195	73.6271	BL	3.86383	3.16232	3.55427	201.062	2.28943	13.8305	21.9828	2.02618	1.09766	3.34316	1.30516	BL	BL	BL	BL	33.5257	1212.48	144.362	6.90713	69.9258	29.3313	BL	388.215	4595.47	129.861	0.574749	12.1795	12.7008	BL	20.3656	48.7584	BL	0.148104	47.9718	2.67221
2010-10-10	17.1958	15105	5643.32	9459.53	26.0754	6.33744	19.4899	87.5897	6.48669	376.375	7.05465	92.5859	86.0841	2.85838	BL	2.31017	1.88758	194.912	0.641242	13.016	16.0645	BL	BL	1.51965	BL	BL	BL	BL	2.57886	12.3259	223.76	33.5799	3.70356	35.3333	17.0571	4.13755	143.645	769.788	27.3716	0.178726	2.90922	BL	BL	4.8334	9.37652	BL
2010-10-12	22.196	17772	4849.08	12922.9	55.6909	21.274	40.6405	121.942	8.35623	489.842	12.5113	90.4384	183.042	5.28721	BL	4.77012	3.3848	364.176	1.28823	25.6456	30.5122	BL	BL	2.66772	BL	BL	2.95518	BL	4.39431	35.7357	222.985	33.3312	6.2819	69.398	24.0617	BL	182.491	828.905	40.8189	0.561245	2.49517	BL	BL	4.3844	7.13695	BL
2010-10-14	18.4012	15618.9	6357.26	8842.73	28.8464	8.48468	23.2095	107.269	BL	393.781	15.486	83.626	141.145	6.10169	BL	3.51972	3.90818	331.01	0.51853	22.4069	29.7717	1.18245	BL	1.24702	BL	BL	3.69698	4.80363	BL	6.5196	66.8274	5.7482	1.34317	9.29463	24.1605	BL	36.2909	124.186	4.10796	0.152751	1.20569	BL	BL	1.61354	BL	BL	0.104517	27.847	0.491862
2010-10-16	19.6103	16604.7	5659.47	10945.2	21.6045	14.1901	24.469	89.6953	4.57581	331.725	15.5074	162.806	119.021	3.62826	1.73889	2.25051	3.59778	262.846	0.46047	19.1113	19.5936	BL	BL	2.10702	BL	BL	BL	3.18715	4.18532	7.02502	74.4942	21.6669	2.41225	17.5407	14.8294	BL	126.97	211.943	7.14525	0.205711	1.49897	BL	BL	2.89791	2.72749	BL
2010-10-18	11.9633	10409.8	4610.98	5798.82	24.8092	10.0307	15.1714	68.8202	BL	353.85	6.23695	80.289	79.9841	BL	2.68861	1.4727	1.36498	170.5	BL	11.7832	11.8501	0.843175	BL	1.28738	BL	BL	BL	BL	BL	17.7386	141.431	23.1259	2.81764	19.6795	24.0433	BL	91.9357	411.463	12.7576	0.216455	1.57946	1.93484	BL	3.91298	3.56431	BL
2010-10-20	24.6026	17290.9	5778.02	11512.9	26.8705	9.36477	27.205	88.8917	6.84915	787.061	31.8526	265.21	130.394	3.73373	BL	3.03873	BL	189.657	0.57202	13.083	21.6122	BL	BL	2.31817	BL	BL	2.77023	BL	6.35907	25.1629	729.103	181.404	8.84547	134.962	30.3411	17.9732	1275.17	2293.38	78.0563	0.0940546	9.70373	8.5895	BL	14.1883	9.99938	BL	0.154251	32.4489	0.984562
2010-10-22	19.9763	17058.6	5522.78	11535.8	38.5586	13.3864	22.9551	91.2484	BL	375.377	22.9488	142.67	84.915	5.02404	BL	2.66636	2.08788	177.947	1.36061	12.1605	23.8592	BL	BL	3.7238	BL	BL	BL	BL	8.00581	38.6263	238.72	72.6338	5.1506	58.7851	29.3725	1.61138	353.997	841.65	41.9502	0.310805	4.2488	2.85864	BL	7.33845	8.60145	BL
2010-10-24	15.2453	14146.1	5788.02	8355.92	7.48293	5.11806	10.586	47.8661	5.56439	199.285	14.1207	67.5926	51.8843	BL	BL	1.87727	1.63148	199.235	0.388013	13.9956	14.9541	0.553746	BL	0.905446	BL	BL	BL	BL	BL	9.06922	51.317	12.509	1.45311	12.4064	21.8955	1.72699	90.3181	143.665	4.77608	0.192083	1.56465	BL	BL	2.41953	BL	BL
2010-10-26	45.3077	22510.8	6711.56	15799.3	41.7444	48.9952	177.394	742.909	BL	1677.25	41.3182	254.358	672.131	25.942	2.52222	7.82597	6.90727	635.67	1.69369	47.7079	48.9023	BL	BL	3.42259	BL	2.65101	BL	BL	17.4561	34.5336	1175.2	146.177	14.1048	394.114	26.5157	147.204	352.033	4131.04	89.7739	1.63118	12.4416	12.637	BL	26.4071	11.459	BL	0.351671	195.92	1.2336
2010-10-28	32.0215	19504.7	5809.09	13695.6	42.1206	19.6829	75.5055	237.631	BL	1791.01	36.0082	278.079	301.234	11.5219	BL	4.06778	6.27299	387.796	1.65776	27.4539	35.5009	2.81521	0.940942	3.56931	BL	BL	5.21407	3.77452	BL	43.8893	1328.46	210.333	13.1068	455.416	31.1592	16.2471	642.344	4830.12	100.182	1.58326	11.949	11.6815	BL	19.7752	14.8799	7.57649
2010-10-30	32.4056	18511.7	5814.89	12696.8	46.6693	16.4962	25.9675	125.73	6.55435	1301.3	26.5904	192.661	164.037	3.42556	BL	5.24645	4.76454	360.516	1.4215	24.2755	31.7975	BL	BL	4.04975	BL	BL	3.20997	3.68077	6.65695	49.8198	1164.96	133.725	10.1358	170.193	24.5363	BL	1496.27	3125.35	111.384	0.470788	11.1296	11.1098	BL	17.6144	15.3003	BL
2010-11-01	29.1925	16402.1	5273.72	11128.4	15.5277	11.7144	33.4502	106.596	BL	866.222	46.9337	335.238	125.537	5.86747	BL	2.68756	3.43313	329.189	0.979694	23.2225	28.4169	BL	BL	4.70076	BL	1.50823	BL	BL	6.71259	25.4456	904.232	235.964	7.31435	115.819	31.4323	BL	1657.92	2112.59	96.6037	0.379251	15.035	14.358	BL	23.1622	10.8792	BL	0.159566	39.9316	1.37143
2010-11-03	21.5708	15177.9	6788.71	8389.23	19.7745	24.8609	91.4176	324.386	5.71011	237.72	69.5046	124.805	569.031	10.5002	BL	3.0646	5.51551	325.621	0.56809	18.1597	18.4834	0.974063	BL	BL	BL	1.7097	BL	BL	BL	11.5065	93.2358	29.3195	2.50479	79.4717	29.5532	BL	203.966	239.969	5.48862	0.488607	2.68566	2.58324	BL	4.65875	BL	BL
2010-11-05	17.7576	12674.1	6095.09	6579.06	245.931	36.0703	26.34	88.8515	BL	216.147	156.494	98.5491	156.748	BL	BL	2.30121	2.87861	241.61	1.13353	14.4242	13.9804	BL	BL	1.84053	BL	BL	2.80872	BL	2.66478	192.829	96.5657	50.2889	15.4937	108.324	139.038	BL	515.662	402.754	12.3747	0.363188	4.06508	2.92829	BL	5.76378	4.61693	BL
2010-11-07	26.6693	15796.7	5625.62	10171.1	23.0892	BL	25.213	101.253	BL	617.87	41.7061	159.226	164.358	5.25101	BL	3.92246	3.94422	322.949	0.794606	21.1193	19.2412	BL	0.800414	1.46951	1.30352	BL	BL	BL	4.62577	17.8271	880.245	110.442	14.1251	197.382	44.5735	2.35614	2245.07	1533.98	88.5356	0.24289	9.86281	8.14375	BL	14.9319	6.91654	9.21987	0.0918143	22.2269	0.559883
2010-11-09	17.7066	14016.1	7102.06	6914.08	25.7889	14.6241	25.2557	113.522	6.77259	136.463	12.5033	64.4158	199.035	BL	BL	2.15371	3.97484	287.712	0.448645	18.6916	17.7412	0.751173	BL	1.58979	BL	BL	BL	3.62612	BL	21.4358	54.4113	7.93882	1.7916	23.1806	14.6477	26.2478	89.4766	64.1915	3.07344	0.259973	2.01375	BL	BL	3.99046	BL	7.83829
2010-11-11	NA	NA	NA	NA	NA	NA	NA	NA	NA	NA	NA	NA	NA	NA	NA	NA	NA	NA	NA	NA	NA	NA	NA	NA	NA	NA	NA	NA	NA	NA	NA	NA	NA	NA	NA	NA	NA	NA	NA	NA	NA	NA	NA	NA	NA	NA
2010-11-13	44.3222	27708.4	4902.81	22805.6	63.5424	23.0651	67.0495	251.996	9.01993	928.925	52.198	500.535	289.644	9.40591	BL	4.99985	7.11264	413.339	4.03815	24.4318	41.4423	2.26944	BL	7.06158	BL	BL	BL	BL	19.3177	93.4737	756.508	445.647	21.6401	274.188	27.559	BL	1703.66	2497.89	228.497	0.42286	18.9531	12.4809	BL	19.9889	20.326	BL	1.05068	53.8669	2.23439
2010-11-15	25.8506	16889.6	4349.19	12542.6	77.8238	15.0277	22.9985	87.0322	8.10296	852.137	25.3327	279.936	77.3697	4.22991	BL	2.33228	3.58365	281.045	1.612	18.6575	19.293	BL	0.817341	3.04542	BL	BL	BL	BL	6.69532	95.1005	588.785	252.706	12.2838	98.8054	26.4746	BL	243.195	2306.3	160.288	BL	11.7287	8.06595	BL	15.3322	21.81	BL
2010-11-17	34.3644	21511.7	5550.15	15963.7	82.9354	18.4585	73.2481	240.084	BL	1461.03	22.5107	325.819	205.214	10.0486	3.66676	4.69356	5.37819	388.512	3.16171	26.3505	29.3969	BL	BL	5.86573	BL	BL	BL	BL	10.731	89.77	1052.45	294.318	18.1323	194.34	23.7664	BL	404.128	3909.05	251.681	0.451532	14.246	9.28446	BL	16.8569	29.4396	BL
2010-11-19	36.9759	23896.3	5458.56	18437.7	54.4529	22.5246	84.3292	260.49	8.74551	1197.66	25.9411	405.927	211.638	8.90719	3.60056	3.4841	5.83878	406.399	2.46686	25.2523	33.5183	2.54425	BL	5.5905	BL	BL	BL	7.97224	4.68267	53.3089	876.682	348.561	13.7397	202.241	20.2135	BL	651.253	3105.74	243.204	0.313543	16.1247	10.9267	BL	19.668	25.7929	BL	0.380587	67.647	3.16504
2010-11-21	36.1631	23081.2	7004.07	16077.2	60.9851	23.9282	96.9262	300.084	BL	1172.23	35.081	504.793	173.316	7.7869	6.37456	3.84665	4.37531	420.555	2.44232	25.856	29.9986	1.4227	BL	4.54159	1.79877	BL	6.26938	BL	8.20352	68.8337	837.771	414.212	13.2864	158.793	21.5509	BL	593.446	2936.49	214.897	0.325566	16.7307	11.3126	BL	19.7512	25.0903	10.7279
2010-11-23	16.1312	10036.1	5508.22	4527.92	342.633	60.0798	83.1967	300.845	BL	814.044	18.6217	144.075	103.333	9.49352	BL	2.63452	2.57877	221.782	1.64024	12.4666	20.238	BL	0.897294	2.9015	BL	BL	BL	BL	2.40658	320.165	404.381	111.676	26.7519	70.5767	18.0385	BL	255.42	2049.51	134.767	0.381464	6.38771	3.62661	BL	10.2312	18.3333	BL
2010-11-25	28.5796	19537.4	5798.13	13741.4	313.365	56.8686	51.9644	154.357	7.44167	762.555	34.0189	291.556	170.078	6.89201	3.28308	4.43469	6.03094	439.888	2.53437	28.9988	30.2858	BL	1.75078	6.51963	BL	BL	BL	BL	7.44369	369.356	294.99	284.689	47.6705	182.76	65.4815	95.0659	392.354	1973.09	198.066	BL	16.0571	12.526	BL	22.9601	18.2531	BL	0.321152	31.2012	2.32928
2010-11-27	17.1356	10531.1	4710.5	5816.31	193.355	39.8311	41.5163	165.803	7.25276	691.864	31.727	128.244	105.175	3.15573	2.89033	3.22505	1.92785	264.708	1.14832	16.8907	19.6266	BL	0.624684	4.29251	BL	BL	BL	BL	3.30164	95.844	261.261	55.7789	9.75198	23.8963	32.9517	4.56887	269.345	948.174	49.5445	0.252802	2.89376	BL	BL	4.80147	10.7493	BL
2010-11-29	18.5222	11461.9	3968.9	7492.97	206.33	39.1644	32.8385	115.343	5.83756	493.3	58.7436	154.654	120.484	6.38512	BL	3.08289	3.17494	315.945	1.48408	19.7564	17.7929	BL	1.01463	4.67471	BL	BL	BL	BL	2.51858	189.663	315.361	116.531	23.1928	71.9923	53.009	25.8556	719.124	1093.53	72.059	0.312978	5.93572	3.61484	BL	8.70624	10.1981	BL
2010-12-01	18.923	13262.8	4632.58	8632.36	67.8344	17.6001	27.3083	104.98	6.91469	314.907	55.1804	98.3998	182.515	4.19093	2.37553	2.93894	3.53376	243.227	1.63826	15.1251	19.941	BL	BL	0.866798	BL	BL	BL	BL	4.00934	63.9852	240.835	75.7641	13.8045	102.399	48.6772	7.58221	708.912	656.998	23.6896	0.302297	3.56833	3.27613	BL	5.46813	2.68356	BL	0.140873	25.7186	0.737582
2010-12-03	35.4839	20624.9	5846.23	14776.5	20.6676	11.0686	37.2604	108.88	9.66989	754.121	134.206	299.519	158.197	6.51922	BL	2.89549	4.50911	283.317	1.23326	18.6141	24.4847	BL	0.80226	4.06724	BL	BL	BL	BL	8.75047	39.3149	1112.12	264.909	14.802	186.084	130.345	15.4041	2956.07	1936.6	91.0992	0.295108	13.4332	10.9273	BL	17.0192	8.66728	BL
2010-12-05	15.3141	11623.3	4131.45	7494.06	BL	6.57344	13.1194	56.4967	7.19185	266.625	25.6188	114.941	69.9436	BL	BL	BL	1.48311	206.677	BL	13.7587	15.9724	0.717679	BL	BL	BL	BL	BL	BL	BL	16.2265	192.565	94.284	3.58422	49.2976	34.9471	BL	322.845	582.18	15.4758	0.208531	5.70263	4.91488	BL	6.00469	2.5495	BL
2010-12-07	57.402	28400.7	1706.2	26694.5	56.1602	BL	28.7599	105.275	12.4676	794.255	460.953	505.519	130.953	BL	2.38448	1.80977	4.83948	246.6	4.49218	16.2102	30.4134	BL	BL	5.05132	BL	BL	BL	BL	19.1289	80.9825	1993.04	469.63	9.77972	174.298	405.371	BL	6289.42	2027.89	120.678	0.570524	27.1176	24.421	BL	34.3532	16.6599	BL	0.62767	26.6142	2.46484
2010-12-09	25.1495	16488.8	4956.35	11532.4	47.6733	20.2949	31.1362	118.936	6.57836	449.31	50.5888	209.51	187.24	4.08529	BL	3.08723	4.44215	299.198	1.97151	20.2596	37.8419	BL	BL	1.97444	BL	BL	BL	BL	6.88974	44.3698	431.751	171.073	7.95501	138.883	43.052	56.4984	1369.09	1020.14	43.0816	0.414739	11.3069	7.92538	BL	18.4282	6.9917	BL
2010-12-11	52.6631	28916.8	6779.94	22134.7	46.767	16.9713	55.6523	218.818	12.7593	796.103	138.28	549.179	301.457	7.43434	BL	4.63543	9.47949	533.52	3.12015	34.5273	40.4449	BL	BL	3.77807	BL	BL	BL	BL	9.32918	59.4409	1248.81	455.461	12.3756	267.859	119.554	78.0966	4683.26	1879.63	84.5276	0.98886	24.9503	21.1073	BL	41.4846	14.2929	BL
2010-12-13	15.0707	9289.79	4314.35	4973.28	91.9776	12.6106	20.8462	81.9782	BL	653.749	12.2792	64.0508	124.022	5.40688	BL	2.12654	3.05791	263.965	BL	16.0344	16.2771	0.620515	BL	2.7844	BL	BL	BL	9.32257	BL	61.3341	324.586	41.8007	5.90177	50.2084	27.0746	15.2468	324.513	1082.2	21.5693	0.317926	2.8817	2.85022	BL	5.6561	2.58963	BL	0.076158	23.6824	0.883465
2010-12-15	23.5684	11322.5	3163.74	8160.95	104.964	9.40167	21.8565	53.1271	BL	1440.95	51.713	118.946	76.1033	BL	BL	2.91533	2.68665	193.073	BL	12.8482	23.0711	0.822324	1.07269	3.3362	BL	BL	BL	BL	BL	138.267	1220.54	148.753	12.5993	95.0015	125.66	94.1168	1589.87	3261.7	65.4115	BL	10.7211	7.46763	BL	16.8931	8.59377	BL
2010-12-17	30.3047	15885.4	4048.03	11841.7	29.1746	BL	34.725	108.995	BL	1037.72	80.716	172.194	203.013	5.56282	BL	1.88361	3.93138	245.101	1.5351	14.9213	28.5543	BL	BL	3.60191	BL	BL	BL	BL	4.649	78.6297	1236.22	180.605	10.3393	175.428	148.898	41.7789	2951	2437.11	82.3088	BL	9.68697	5.93673	BL	17.683	11.1456	BL
2010-12-19	22.1899	11775.6	2518.86	9256.71	52.9786	BL	10.5126	46.225	BL	638.13	71.0027	142.444	87.1455	BL	BL	BL	2.85033	153.807	0.636115	8.68506	18.7707	0.932599	BL	3.08698	BL	BL	4.1643	6.49094	BL	187.185	972.828	234.47	5.66675	104.174	247.903	11.4644	2469.89	1546.12	60.522	BL	11.4296	10.7541	BL	15.6868	10.2057	BL	0.108707	176.934	1.27119
2010-12-21	77.9832	33541.8	2926.73	30617.2	34.7337	BL	14.7643	74.7314	12.3239	1016.08	432.923	612.226	58.5449	BL	BL	1.83935	3.27159	179.362	6.58182	11.5453	43.0927	5.55576	BL	9.58858	BL	BL	BL	BL	20.925	124.777	3395.52	611.723	6.81748	122.306	711.288	4.37676	10873.3	2734.12	167.833	BL	36.138	35.4902	BL	61.0245	17.6334	BL
2010-12-23	17.4181	9021.08	3974.8	5048.43	725.662	108.272	64.699	209.8	6.41721	298.774	928.512	94.3419	296.565	8.04747	BL	2.28964	3.14243	220.181	1.09748	11.4724	14.3876	BL	BL	4.90777	BL	2.51348	BL	BL	2.5096	493.419	81.6778	41.7816	36.1885	83.3271	596.551	3.85249	583.796	469.073	18.7165	0.498347	2.56186	3.33789	BL	4.10854	2.57238	BL
2010-12-25	10.3702	3435.47	1042.95	2394.68	802.941	117.102	62.2453	168.223	BL	262.56	1142.94	70.3718	115.028	5.94051	BL	BL	2.0063	124.397	0.591274	5.09383	8.66714	BL	0.823259	3.06504	BL	BL	BL	BL	BL	426.047	51.3865	25.3773	42.7005	63.453	603.105	3.5542	296.552	336.631	10.701	0.347986	BL	BL	BL	1.92493	2.36329	BL	0.0273561	40.3921	0.837961
2010-12-27	18.2503	11428	4810.98	6619.15	38.3459	15.9033	26.3284	117.808	5.73619	240.188	21.0728	171.731	170.143	5.73882	BL	1.81475	3.77653	283.568	1.06877	17.6658	20.5067	0.928935	BL	3.85469	1.50158	BL	BL	8.84082	2.75729	87.0649	303.421	184.694	32.3506	186.73	118.932	92.5157	1316.92	520.575	50.9634	BL	10.9773	8.1721	BL	18.9937	6.00681	BL
2010-12-29	47.3365	26480.4	3563.26	22917.2	44.486	9.43272	19.0277	82.5034	BL	648.907	111.52	393.375	50.1533	BL	3.56944	1.90899	4.82693	229.691	6.46282	15.5942	32.1762	BL	BL	6.97912	BL	2.5429	3.43382	BL	11.7853	59.2998	1217.57	345.67	12.0223	113.144	321.264	65.9336	3871.15	1294.07	94.8626	0.332736	25.2782	20.4396	BL	33.9282	14.9529	BL
2010-12-31	NA	10561.7	5422.35	5139.35	334.063	66.3308	43.1266	110.146	7.31332	380.492	294.269	134.34	205.885	9.15878	2.85641	1.71482	3.41482	232.286	1.68619	14.0686	13.2264	1.38414	BL	4.8377	BL	BL	BL	BL	BL	327.796	273.876	94.1169	28.795	94.3039	261.358	BL	782.267	919.96	35.5206	0.0980271	5.03756	4.53366	BL	4.41447	7.73313	BL	0.0371138	24.5184	2.12787
2011-01-02	13.6138	8467.15	3753.1	4716.21	211.382	32.8006	17.036	52.0859	BL	255.74	116.228	97.8346	101.261	BL	BL	1.77869	1.78296	194.482	1.20548	12.2943	11.3065	BL	0.987913	2.94644	BL	BL	BL	BL	BL	238.011	395.24	87.2691	27.1061	88.8859	141.053	BL	1260.57	613.189	32.9355	0.315174	8.18929	7.27087	BL	13.0349	4.92002	BL
2011-01-04	23.2347	15032.9	6073.65	8957.13	29.5927	6.36568	11.3058	53.7796	11.1349	196.159	45.5635	181.882	69.8419	BL	BL	BL	BL	217.295	1.03508	12.7896	16.1761	1.25653	BL	BL	BL	BL	BL	BL	BL	27.4052	609.388	136.23	17.4369	85.9864	64.2631	BL	1933.93	448.32	45.6037	0.375228	13.4575	11.9577	BL	24.646	4.31361	BL
2011-01-06	NA	10167.2	3183.87	6983.36	37.593	8.85337	9.71349	49.2154	BL	168.192	73.8132	115.672	46.9311	5.65284	BL	2.16381	1.16128	181.526	1.19763	11.1053	12.8249	BL	BL	1.04081	BL	BL	3.522	4.72838	BL	41.3869	570.293	95.9059	10.1716	65.4084	104.137	BL	1810.14	416.108	34.8705	0.0645236	11.0058	10.6057	BL	16.5375	4.01592	BL	0.0696577	7.11976	0.347923
2011-01-08	27.6618	17433.7	674.099	16759.6	64.243	17.8345	47.2731	140.597	6.67939	266.229	144.248	236.134	94.42	6.63029	BL	3.05055	3.17173	296.26	2.39373	18.4055	30.3512	1.98837	BL	3.64738	BL	BL	3.15173	BL	BL	62.0263	578.862	168.831	12.9194	98.6071	127.584	6.16569	1867.88	627.524	48.7194	0.272304	16.418	12.7594	BL	25.0856	4.89761	BL
2011-01-10	20.7607	9730.95	3617.25	6115.85	166.403	28.0141	13.553	66.3704	BL	624.591	291.26	115.589	127.061	3.49175	BL	BL	0.977019	183.699	0.506872	10.8241	15.2314	1.33859	BL	3.65141	BL	BL	BL	BL	BL	247.763	930.343	119.406	26.2422	149.377	340.939	BL	1533.49	2291.35	54.6964	0.265481	11.6569	10.5492	BL	18.9614	9.25828	BL
2011-01-12	43.0078	23182.8	5556.53	17626.3	49.4783	25.9155	60.0369	187.949	8.80886	751.332	404.606	477.778	344.774	8.63138	BL	3.11793	5.3392	369.901	2.54278	22.4724	44.7834	BL	BL	24.4723	BL	BL	BL	BL	9.42189	67.1121	1244.88	422.951	26.2144	411.017	411.589	0.578746	3732.21	2349.24	95.6439	0.516733	27.3873	25.7144	BL	53.8575	12.3227	8.23813	0.31659	55.0348	0.967357
2011-01-14	38.0238	17894.9	4719.99	13174.9	37.6329	16.6988	45.7739	143.521	BL	792.157	127.988	297.517	230.492	8.47303	BL	3.56912	6.2767	376.311	1.99631	24.7588	31.6172	BL	BL	3.20283	BL	BL	BL	BL	7.50789	46.2811	1712.46	247.263	11.9719	250.216	122.118	2.16552	5661.77	2177.2	78.7462	0.493507	19.8718	24.1919	BL	49.8388	15.3001	9.45336
2011-01-16	33.4035	13337.7	3417.03	9920.63	56.5317	22.0222	41.0716	142.53	BL	1748.05	65.0991	231.975	196.659	8.23223	BL	3.55405	6.23172	467.758	1.74861	28.2205	33.3225	2.31679	BL	4.01428	BL	BL	3.62993	BL	BL	59.9431	2050.49	185.733	11.9465	212.202	70.4557	7.53567	3130.54	4844.34	80.7293	0.816265	18.6589	23.8442	BL	43.7472	17.1983	9.66949
2011-01-18	42.9298	19239.7	4358.53	14881.2	37.6011	23.716	78.905	258.011	BL	1257.26	112.374	317.588	473.467	17.0396	BL	7.66916	7.93879	600.662	2.2201	36.7598	37.9434	BL	BL	1.64037	2.97065	BL	4.5785	BL	8.90906	70.3755	1704.7	287.221	19.7635	486.091	121.478	7.35145	4194	3679.56	114.775	0.318747	22.6649	27.7274	BL	56.7778	13.5097	10.6535	0.161029	56.1188	0.507174
2011-01-20	57.901	28725.1	6168.8	22556.3	66.2142	34.2231	72.4224	273.986	7.53839	506.654	404.837	594.249	426.098	8.92112	2.58472	4.42404	7.11421	490.217	6.07098	29.1954	54.7601	BL	0.912265	5.70063	BL	BL	BL	BL	26.8485	71.0554	1596.22	507.04	13.964	418.023	294.213	BL	7457.74	1167.46	89.8206	0.752306	32.4927	29.6141	BL	65.8307	14.6937	BL
2011-01-22	31.41	15775.2	4775.98	10999.2	30.0495	19.6522	33.8517	129.781	BL	797.86	70.719	260.64	212.498	4.94502	BL	4.16973	5.52951	373.093	0.936301	22.1389	28.7783	BL	BL	2.26616	BL	BL	BL	4.71885	5.71108	36.3219	1410.25	215.631	8.04189	189.203	75.5475	BL	4415.6	1970.96	75.0551	0.365447	16.5362	15.8829	BL	31.0261	13.5543	BL
2011-01-24	52.0313	20482.4	4047.66	16434.7	46.3633	8.15705	30.5346	111.082	BL	1202.96	69.3123	506.479	162.157	9.94356	BL	3.74417	4.85726	366.923	2.51866	21.9435	34.2489	BL	BL	5.22879	BL	BL	BL	BL	11.3928	53.0483	2605.37	409.599	13.4932	186.689	41.6044	4.14534	7644.9	2969.16	159.353	0.218382	35.518	28.2861	BL	49.98	23.0329	BL	0.389377	30.037	0.706614
2011-01-26	22.8058	11986.8	5903.77	6078.75	21.002	8.44396	22.4858	108.285	BL	1048.58	15.2441	173.942	146.323	5.0558	BL	2.23699	3.47459	266.244	0.887575	15.6567	22.8932	BL	BL	2.14841	BL	BL	BL	BL	5.47006	19.7413	869.654	134.425	5.89493	95.2852	16.9147	2.55049	918.929	2403.79	93.9007	0.709674	12.7628	10.713	BL	22.8919	12.2419	BL
2011-01-28	41.3248	20743.1	4963.82	15779.3	69.4762	14.509	35.9865	113.33	9.16282	1052.18	52.1846	453.912	169.457	5.93776	4.45235	2.98862	5.75616	386.405	2.44425	24.273	30.8254	BL	BL	4.63712	BL	BL	BL	BL	7.33839	69.566	1118.78	318.964	11.5548	161.121	29.5491	2.31796	3175.61	2285.31	121.033	0.316353	24.3715	19.5897	BL	36.3378	10.8552	BL
2011-01-30	29.2552	16950.6	5246.32	11704.3	85.5005	19.3055	31.7293	113.573	BL	457.443	37.5576	248.611	208.118	6.69343	BL	1.47042	4.13949	298.019	2.56521	17.1081	25.0461	BL	BL	5.03046	BL	BL	BL	BL	5.45102	76.1467	562.193	191.361	12.8977	180.044	24.6236	BL	2198.48	1031.33	96.0724	0.168141	17.8285	13.057	BL	25.7537	8.33856	BL	0.158703	20.163	0.797355
2011-02-01	24.2669	13165.1	4533.81	8631.3	35.435	19.5449	37.3658	126.614	5.35131	421.554	16.5219	229.424	197.562	6.64919	BL	2.31274	3.70257	297.605	1.16087	17.937	24.2484	1.46069	BL	2.10562	BL	BL	BL	BL	BL	34.5222	491.167	168.411	9.7647	176.715	25.8819	BL	1805.8	909.184	65.7195	0.206873	15.8149	11.4427	BL	22.2978	5.23985	BL
2011-02-03	42.6606	22074.8	4125.12	17949.7	67.2949	19.0024	37.1442	99.515	8.22291	614.937	102.093	494.004	200.848	7.08976	BL	3.56943	4.45286	339.808	2.78077	21.6211	30.4341	BL	BL	4.82983	BL	BL	BL	BL	9.47307	57.5126	886.525	373.498	12.0323	221.917	57.774	0.692079	3504.61	1385.67	110.892	0.103726	27.4551	19.6366	BL	35.9154	7.55471	BL
2011-02-05	29.0179	13954.4	4589.55	9362.68	98.4091	15.6169	39.1219	101.009	8.07467	466.976	300.163	201.797	177.336	5.89837	BL	3.21025	3.78876	283.961	1.09248	18.0002	26.6709	BL	BL	12.7765	BL	BL	BL	BL	4.38087	93.0995	777.241	160.964	14.1615	166.812	296.787	BL	2024.32	1149.63	146.498	0.183454	14.5045	11.1674	BL	21.5677	7.02226	BL	0.476902	25.3947	0.918857
2011-02-07	17.7601	7793.22	3291.82	4501.41	51.2252	13.6062	33.1778	140.402	BL	864.381	18.8888	91.2446	225.356	5.82351	BL	2.71602	4.27507	320.747	BL	17.9387	18.1295	BL	BL	2.1709	BL	BL	3.21309	BL	BL	48.4905	655.278	75.7987	12.6144	183.074	24.5145	16.1325	999.584	1948.88	76.0519	0.364279	8.14344	6.08888	BL	13.2962	6.12262	BL
2011-02-09	34.8521	14162.2	5051.93	9110.32	61.3123	15.8603	58.4368	218.422	8.50293	1598.16	64.1196	265.424	367.568	7.48774	BL	4.76245	5.63131	396.956	1.53906	23.3482	30.7431	BL	BL	3.77257	BL	BL	BL	BL	8.39267	49.7992	1842.95	228.821	13.9474	344.113	63.2918	2.4023	3504.79	4434.07	106.737	0.712472	17.0604	16.4863	BL	30.3687	11.7993	BL
2011-02-11	22.7797	11567	5756.53	5810.51	18.1266	11.5908	22.9356	85.7677	12.3831	899.779	28.8965	130.514	124.405	BL	BL	1.77445	2.39523	244.549	1.04064	15.2929	16.5903	BL	BL	BL	BL	1.65577	BL	BL	1.82397	17.4864	978.664	111.647	5.56263	134.638	44.1329	BL	1561.84	2287.57	47.6005	0.244479	11.408	10.7949	BL	15.0904	5.50797	BL	0.141872	22.0603
2011-02-13	42.029	14102.4	2914.24	11186	71.6673	16.3099	37.3497	150.836	6.62959	1667.97	282.343	300.575	217.297	5.91446	BL	2.8376	5.28058	365.652	1.85977	21.0391	31.3379	BL	BL	3.75135	BL	1.95884	BL	BL	8.99058	112.001	2771.05	285.543	15.7497	250.025	244.95	4.65103	5975.82	5006.48	107.34	0.297521	18.6349	17.8064	BL	35.1029	15.235	BL
2011-02-15	35.7636	12950.1	2535.18	10415	66.2746	17.6815	52.7519	212.221	BL	2141.67	76.7077	269.535	314.498	9.57027	2.34034	4.46457	5.17529	364.702	2.12626	21.8406	37.5288	BL	0.714666	2.61427	BL	BL	BL	BL	10.9065	79.7017	2653.57	264.847	14.5737	344.356	99.7379	6.68153	2735.35	7234.85	120.494	0.503679	16.8847	18.6623	BL	33.3753	11.261	BL
2011-02-17	21.7853	11342.3	3358.84	7981.29	28.5544	23.8954	61.6975	261.314	5.66971	430.003	39.8076	167.234	496.822	6.77443	BL	2.15462	5.4244	282.759	1.23981	14.8538	22.7621	BL	BL	1.50104	BL	BL	BL	BL	4.94534	26.3642	476.915	116.948	7.7378	296.04	44.9025	BL	1203.91	1026.55	47.8365	0.309457	10.1596	11.2602	BL	15.8318	5.35401	BL	0.27735	51.2296	0.725143
2011-02-19	15.9727	9836.19	3571.1	6265.09	246.914	49.0858	81.1678	227.739	BL	247.251	235.592	102.506	152.795	5.61343	BL	3.3389	2.36663	230.076	1.08559	11.3117	15.6736	1.05445	BL	3.01106	BL	BL	BL	BL	BL	135.075	142.62	36.336	10.161	95.4603	113.245	BL	382.872	313.628	11.3363	0.184722	2.7619	BL	BL	3.04406	2.41734	BL
2011-02-21	15.4293	7942.69	2141.65	5801.03	119.271	29.94	26.9626	99.686	BL	364.547	68.8227	140.976	182.331	BL	BL	2.65933	1.6516	215.616	0.66757	13.3911	13.0715	BL	0.836824	3.0315	BL	BL	3.1906	BL	BL	108.934	478.355	105.56	16.8199	181.607	68.0217	BL	1182.09	933.919	35.0026	0.163967	10.8698	9.73511	BL	16.3373	5.03877	BL
2011-02-23	21.9649	10729.6	2745.04	7980.27	241.403	49.9044	79.0488	160.97	5.80088	412.998	76.5184	174.73	301.007	7.74675	BL	2.22422	4.2573	309.79	2.19034	18.1208	20.5036	BL	BL	77.7446	BL	BL	BL	BL	BL	214.219	359.135	110.915	33.3507	174.185	91.6139	8.1837	1543.66	862.047	57.9954	0.330396	11.0446	8.12815	BL	15.3877	6.39308	BL	0.0906286	26.5355	0.902481
2011-02-25	21.9693	10680	3116.52	7563.44	288.758	54.8837	57.6741	200.98	10.9546	462.649	75.6698	191.063	373.696	7.17071	2.30834	2.63428	4.81477	323.915	2.50437	18.9037	20.0312	BL	0.844344	5.56029	BL	BL	BL	BL	5.3445	254.116	212.168	136.647	40.457	299.806	54.2181	BL	1123.68	1026.21	80.9868	0.357075	12.3766	9.65481	BL	19.7325	8.0893	BL
2011-02-27	21.0496	9963.28	4339.09	5626.35	385.977	57.6241	32.8316	133.076	6.27226	292.239	74.2889	199.411	207.082	5.81667	BL	3.41243	2.54749	323.691	1.59653	18.3637	18.7146	0.953655	BL	4.52025	BL	2.78782	BL	BL	3.59218	370.367	125.171	154.536	44.3266	220.854	70.6755	BL	1331.57	655.71	68.4588	0.516514	13.8254	11.0068	BL	23.9416	6.73009	BL
2011-03-01	14.3538	7229.99	2926.99	4303	330.982	44.7052	22.5436	88.6682	BL	416.865	29.3227	116.119	120.052	BL	3.00232	3.30953	2.01874	197.209	1.72505	12.4893	14.2124	0.953742	BL	4.20761	BL	BL	BL	BL	BL	281.055	200.898	84.9959	35.1683	138.34	46.3913	BL	686.668	953.895	64.0791	0.355795	6.99108	6.0763	BL	11.2649	8.11871	BL	0.51162	12.5848	2.05266
2011-03-03	29.4205	12890.3	3730.16	9160.16	138.602	23.2332	36.8923	123.034	5.47635	452.201	89.6322	300.655	183.942	6.20524	2.86932	3.45848	3.21917	318.264	1.55982	20.6307	32.5577	BL	BL	4.06849	BL	BL	BL	BL	10.5998	148.496	483.441	248.108	31.2817	207.58	96.1739	2.07081	1830.49	1066.3	109.05	BL	15.3972	12.8734	BL	29.1035	8.75385	BL
2011-03-05	21.8918	9577.89	3901.14	5678.91	58.6334	23.4221	41.7904	159.937	BL	705.325	21.4219	89.0832	250.117	4.40434	BL	3.6925	4.22267	337.974	0.872312	19.294	21.1679	BL	BL	2.376	BL	BL	BL	BL	3.5502	48.3304	670.787	70.4824	15.7157	191.377	29.2927	11.9858	1522.02	1536.04	70.364	0.425911	8.41313	7.09313	BL	16.0883	8.35673	BL
2011-03-07	18.5299	9577.89	3901.14	4799.75	70.4678	9.72569	34.8593	119.603	5.80986	824.05	26.0887	150.722	133.722	4.55403	BL	2.3084	3.19898	256.41	0.915277	13.5458	16.1507	BL	BL	3.64463	BL	BL	BL	BL	3.23759	68.8403	830.757	116.246	13.3498	159.22	28.5666	4.21867	1323.04	1975.46	93.1374	0.142997	12.2457	11.46	BL	21.0357	8.00249	BL	0.0769892	20.2676	0.605296
2011-03-09	16.9469	7659.72	1978.65	5683.23	NA	NA	NA	NA	NA	NA	NA	NA	NA	NA	NA	NA	NA	NA	NA	NA	NA	NA	NA	NA	NA	NA	NA	NA	NA	NA	NA	NA	NA	NA	26.9745	25.9096	862.321	2970.58	95.549	0.197418	11.7722	7.45303	BL	18.0916	5.41704	BL
2011-03-11	24.3108	11697	4223	7473.95	23.6244	23.6186	55.1407	228.611	6.36667	865.08	32.4531	150.134	537.267	6.98158	BL	2.87897	5.28913	367.296	0.906398	20.7102	22.8287	BL	BL	BL	BL	BL	BL	BL	5.68247	NA	NA	NA	NA	NA	39.7076	22.3712	1031.24	2012.28	75.0525	0.631245	12.0373	6.86913	BL	18.1202	6.1623	BL
2011-03-13	35.2989	13667	6130.37	7536.59	57.5215	19.4288	54.6008	196.864	BL	1589.46	42.9873	339.452	361.708	5.54082	BL	1.84273	5.02343	348.289	2.08145	19.5263	30.3484	BL	BL	5.01634	BL	BL	BL	BL	9.25472	60.4307	1966.18	264.352	17.0171	410.974	44.8098	BL	3565.34	4142.37	164.835	BL	2.11079	1.70411	BL	3.6341	3.75929	BL
2011-03-15	40.3809	14585	5495.3	9087.55	36.7816	19.4383	54.7742	191.469	7.32618	1565.36	35.1776	303.098	276.5	11.012	BL	4.29108	5.62159	408.596	1.91927	23.876	36.7051	BL	0.626655	5.24358	BL	2.11522	BL	BL	6.37438	54.0084	2972.91	254.045	17.3766	356.111	49.2517	BL	7188.93	4706.98	252.762	BL	2.35388	2.51222	BL	5.02091	4.24735	BL
2011-03-17	24.8778	11264.9	1051.97	10213	34.6986	7.41248	34.0696	129.905	BL	827.691	26.5372	254.575	185.9	BL	3.11978	2.41674	2.76522	238.669	1.8401	14.6523	20.8436	BL	BL	3.82348	BL	BL	BL	BL	6.65655	59.9504	1259.75	221.851	12.9693	214.343	38.5644	5.46697	2929.03	2370.05	157.675	0.145759	16.4882	12.179	BL	28.1417	10.3726	BL
2011-03-19	29.1344	13932.7	2952.86	10979.8	75.2954	14.077	36.7295	130.301	5.56082	1125.82	36.0478	272.644	185.367	3.94413	BL	3.33883	4.35505	352.465	1.7923	21.6828	24.5815	1.77136	BL	5.70647	BL	BL	BL	BL	2.2667	91.1195	1311.54	241.429	16.6421	208.771	42.5492	37.4029	2153.45	3139.76	183.936	0.160211	16.194	12.408	BL	35.3216	18.9664	5.55154	0.200069	36.5366	2.53122
2011-03-21	29.3482	12543.7	3160.23	9379.16	142.694	36.3833	95.8802	291.941	5.32773	1364.08	47.9209	342.895	143.666	7.8366	3.72631	2.11533	1.17653	288.99	1.27895	14.3319	19.4512	2.3971	0.604197	7.12039	BL	BL	BL	BL	BL	153.639	1307.55	261.004	22.0058	152.44	48.0428	25.5688	1724.03	3526.81	168.441	0.933179	15.9284	12.0649	BL	33.2828	21.5842	BL
2011-03-23	27.7934	13692.9	3870.9	9824.14	73.5358	52.4183	168.859	464.989	9.04682	1071.21	19.9793	340.595	375.176	13.4215	2.98589	3.55658	6.9058	446.043	1.92664	23.5256	26.7751	BL	BL	7.39063	BL	1.58589	BL	BL	5.32382	53.9532	701.3	231.556	21.0769	266.015	31.8811	7.99023	693.453	2465.34	123.062	1.06602	17.8063	11.2828	BL	28.5536	16.0219	BL
2011-03-25	23.6487	11241.2	2315.63	8927.7	57.8944	34.9468	124.791	346.769	BL	991.229	19.5474	347.869	177.052	12.4377	BL	2.2358	4.18868	292.169	1.64079	14.1677	21.7569	BL	0.825142	5.46468	BL	BL	3.13007	BL	8.36656	64.2208	862.877	277.365	18.2437	221.267	35.3694	18.0969	776.521	2608.72	158.194	0.657396	20.8479	17.7053	BL	37.135	19.9882	6.43681	0.417421	105.213	2.5321
[truncated: 11 more columns]

## Sheet: UB
BL = below detection limit
NA = not available
UB	PM (ug/m3)	sunset (ng/m3)			PIXE (ng/m3)																									IC (ng/m3)																	ICP (ng/m3)
date	PM	TC	EC	OC	Na	Mg	Al	Si	P	S	Cl	K	Ca	Ti	V	Cr	Mn	Fe	Ni	Cu	Zn	As	Se	Br	Rb	Sr	Zr	Mo	Pb	Na+	NH4+	K+	Mg2+	Ca2+	Cl-	NO2-	NO3-	SO42-	Ossal.	F-	Acet.	Glicol.	Prop.	Form.	MSA	Piruv.	Cd_s	Al_s	V_s
2010-03-20	10.4703	2724.11	314.511	2409.6	110.87	19.3079	32.3185	106.131	BL	542.666	32.8014	62.8513	165.359	8.7663	BL	BL	1.89781	57.6746	BL	2.58911	11.7115	BL	1.34029	2.81297	BL	BL	BL	BL	3.90095	101.853	437.892	31.0667	14.5933	90.2398	35.4251	209.49	315.094	1213.37	24.9737	0.412227	5.81415	7.67984	NA	17.3575	7.53439	BL	0.0870497	45.4254	0.626256
2010-03-22	15.441	5569.96	907.257	4662.7	87.1439	29.93	45.9671	155.377	BL	993.715	45.4115	170.074	187.713	4.43063	BL	2.08155	BL	135.69	BL	7.82471	16.029	BL	BL	4.04225	BL	BL	BL	BL	4.42215	78.6213	840.921	95.0461	8.71196	123.989	47.2067	6.11421	1155.45	2154.59	67.8635	0.283287	12.4446	13.6886	NA	21.0451	11.5091	BL
2010-03-24	18.6184	6640.7	1626.09	5014.61	178.385	42.4621	72.3578	144.3	BL	872.341	285.577	200.527	136.399	BL	3.95416	2.57496	2.85278	152.527	1.92789	8.26021	30.4055	1.50924	1.50682	27.5225	BL	BL	BL	BL	4.03323	178.169	921.505	120.386	9.73124	116.714	171.157	BL	1910.86	1875.73	108.43	0.233928	13.0973	13.0588	NA	20.233	23.0523	BL
2010-03-26	14.7816	7326.8	1747.43	5581.85	187.316	41.8601	66.5725	228.736	BL	406.876	57.1281	200.118	289.18	8.55747	4.20719	BL	4.97594	234.028	2.54825	11.7721	17.2855	BL	1.10909	8.10481	BL	BL	BL	BL	8.51439	196.663	293.79	123.093	20.1896	190.329	61.9265	16.9716	967.76	987.223	69.1329	1.06785	13.3871	13.25	NA	22.3183	19.3911	BL	0.143597	53.7092	1.13973
2010-03-28	17.4668	7134.37	1202.28	5932.09	289.654	50.2548	31.7785	114.296	BL	721.469	154.587	276.473	93.7194	BL	BL	BL	1.38741	91.2687	1.58993	6.04568	15.4087	BL	0.797116	8.90665	2.25057	BL	4.74635	BL	4.45665	312.764	720.586	187.702	26.594	146.203	129.07	90.4035	1677.62	1806.05	104.498	0.291957	16.5039	15.7506	NA	31.5015	41.9799	BL
2010-03-30	6.28029	3172.86	689.106	2483.76	129.476	29.6269	25.1543	88.8829	BL	401.999	11.4647	63.2571	94.3001	BL	3.18808	BL	BL	60.9888	0.811476	3.432	7.63131	BL	BL	1.3671	BL	BL	BL	BL	BL	95.9935	317.2	34.5752	9.73761	62.0132	11.5045	43.682	277.83	876.262	39.5041	0.188282	6.04847	7.31187	NA	12.3244	12.4975	BL
2010-04-01	6.00186	3038.95	845.255	2193.7	39.6979	25.6142	101.186	274.282	BL	315.807	12.1671	85.3604	74.4542	7.65652	2.66936	BL	2.48133	99.0667	0.790117	2.48321	5.68514	BL	BL	1.93484	BL	BL	BL	BL	BL	7.44323	92.4982	12.8066	4.18826	26.0206	4.19978	BL	70.271	280.314	11.8414	0.213816	2.4631	3.06786	NA	3.41892	3.41743	BL	0.102378	58.9372	0.672248
2010-04-03	10.4796	6151.82	1435.09	4716.73	36.9534	14.8723	33.2939	113.367	BL	564.243	11.9187	160.133	143.51	4.62422	3.25476	BL	2.4964	102.956	1.22682	5.81032	15.6862	BL	BL	3.24916	BL	BL	BL	BL	3.15363	22.2748	371.433	106.138	11.6407	112.308	6.53023	23.6513	179.818	1202	67.2917	0.326403	11.4607	13.8797	NA	29.1291	13.6472	BL
2010-04-05	13.5495	6206.91	1234.44	4972.47	24.459	16.1008	56.3522	159.25	BL	992.718	19.3191	165.042	87.4463	7.84454	3.13992	BL	1.52382	118.201	1.71325	6.85966	17.0662	BL	1.50195	3.6786	BL	BL	BL	BL	6.75435	18.0361	791.922	110.816	12.485	85.9283	10.13	41.5025	349.416	2396.78	105.791	0.53655	14.4097	18.2625	NA	37.4425	17.755	7.66976	0.168651	37.8821	0.981185
2010-04-07	21.4437	6028.22	1194.74	4833.48	60.9425	25.986	76.714	214.845	BL	2506.26	13.0539	212.65	167.239	11.4406	5.81899	BL	4.67218	122.115	3.64539	5.45852	28.3619	BL	BL	4.61466	BL	BL	BL	BL	4.70959	42.5361	1767.83	122.973	26.1061	93.6273	10.7715	5.97147	401.385	4890.46	149.896	0.302326	15.1244	22.3221	NA	39.641	42.48	8.00349
2010-04-09	20.2158	9558.94	2154.23	7404.71	33.0119	24.1175	82.9837	217.832	BL	1339.89	14.3513	331.203	166.725	7.58962	6.08147	BL	2.79246	184.691	1.59667	9.6001	19.8334	BL	1.13753	4.47879	BL	BL	BL	BL	6.91193	27.2456	877.243	203.641	19.6579	116.178	11.3306	1.54292	292.044	2940.93	129.38	0.378507	16.9017	24.5505	NA	42.8215	25.8919	9.32843
2010-04-11	15.3696	5872.91	1070.96	4801.96	29.4387	26.6989	92.2227	230.325	BL	1368.88	10.6535	221.559	104.8	8.44067	BL	BL	2.34339	109.745	1.1307	3.59024	15.9091	BL	0.728314	4.41495	BL	BL	BL	BL	5.43931	24.8125	956.014	135.468	17.5383	92.9271	11.1942	BL	183.98	3141.34	114.882	0.369098	14.2028	20.3541	NA	36.6903	17.0528	8.85214	0.16732	58.2723	0.922633
2010-04-13	19.7748	5357.07	743.694	4625.77	33.608	21.4479	80.3815	221.834	BL	2279.72	11.0525	230.617	90.8215	8.72537	BL	BL	1.5729	90.9127	1.11353	2.37362	18.3707	BL	BL	6.26589	BL	BL	BL	BL	5.42302	24.5129	1491.04	129.854	19.4262	79.1342	13.4861	BL	111.994	4360.59	130.893	0.575559	16.2332	26.0901	NA	43.3861	19.6576	BL
2010-04-15	22.0435	7452.49	1472.65	5979.84	73.3965	34.9199	113.907	302.221	BL	2171.4	18.274	303.913	171.528	12.1623	3.91694	BL	3.96089	157.5	2.34255	5.40423	18.9769	BL	1.76603	6.62853	BL	BL	BL	BL	7.2423	64.4612	1522.93	178.877	35.4863	135.977	18.1504	26.252	262.119	4585.04	150.899	0.584456	17.2161	26.8361	NA	50.8678	31.7007	9.78394
2010-04-17	6.25666	3054.1	805.668	2245.95	216.327	45.6499	22.3846	68.4468	BL	484.212	13.0919	62.6674	65.1704	8.42806	5.30736	BL	BL	54.4705	0.91608	3.69329	8.37609	BL	BL	BL	BL	BL	BL	BL	BL	90.966	211.274	23.6358	13.9708	32.0963	10.2771	BL	196.688	736.534	27.7868	0.144605	3.07835	3.36406	NA	8.70101	16.912	BL	0.0899429	19.4104	1.14745
2010-04-19	6.85582	3507.63	577.581	2930.05	36.8334	10.4421	18.214	65.6212	BL	472.296	8.45241	82.7926	64.104	BL	BL	BL	BL	35.9544	BL	3.04817	9.44706	BL	BL	2.70189	BL	BL	BL	BL	BL	9.20704	270.482	36.3762	4.59325	16.9222	3.82598	BL	143.018	774.85	31.9565	BL	6.33514	6.48207	NA	15.0393	10.5935	BL
2010-04-21	11.7747	2602.93	297.477	2305.45	51.7302	46.439	137.111	351.38	BL	1487.08	BL	122.815	126.835	7.83389	BL	BL	4.39997	112.953	BL	1.31157	12.7557	BL	BL	3.96973	BL	BL	BL	BL	BL	30.002	996.543	50.3851	17.2618	64.6916	12.0075	BL	83.5842	3298.98	58.9371	0.390814	7.2481	10.1957	NA	20.473	15.3583	BL
2010-04-23	12.7982	5704.23	1100.69	4603.55	23.4092	14.4606	46.22	126.801	BL	949.284	9.0107	168.146	110.3	4.40772	BL	BL	2.61653	110.493	BL	6.08079	16.4136	BL	BL	2.52028	BL	BL	BL	BL	6.74403	21.6284	731.271	113.873	20.0772	106.968	10.5413	BL	123.096	2367.74	86.7145	0.433114	12.2591	16.3679	NA	29.2902	19.5738	BL	0.209553	29.7032	0.586739
2010-04-25	11.1333	4581.4	872.648	3708.75	22.3639	9.80476	19.6883	86.9186	BL	1107.72	BL	110.717	73.3133	BL	3.07732	BL	BL	67.4032	BL	3.44502	11.5872	BL	BL	3.12911	BL	BL	BL	BL	BL	17.6272	837.133	82.9685	11.6419	67.0981	13.7789	25.0766	113.089	2587.97	68.4547	0.270403	9.69995	15.2408	NA	29.9879	32.736	BL
2010-04-27	19.2907	9898.56	3336.71	6561.86	47.7371	42.6811	171.811	457.936	10.1985	828.871	24.7881	216.888	271.738	15.8839	BL	2.71018	3.65253	241.387	2.23315	9.47904	20.6139	BL	BL	5.04332	BL	2.54252	BL	BL	3.31033	37.6365	839.933	145.176	20.8923	270.128	21.8466	3.97654	1364.78	2240.53	138.84	0.532809	15.8008	19.2176	NA	34.4505	38.5966	BL
2010-04-29	6.33555	2243.56	530.521	1713.04	327.224	52.9923	21.7788	80.1605	BL	216.887	338.421	46.4787	93.9484	BL	BL	BL	BL	48.8305	BL	2.40672	7.44001	BL	BL	1.89188	BL	BL	BL	BL	BL	361.158	162.76	31.4788	32.9269	77.0482	381.398	BL	367.723	622.026	27.1687	0.291605	2.97203	4.34378	NA	9.69517	18.8515	BL	0.0666201	18.1481	0.528371
2010-05-01	13.1322	6077.9	1080.74	4997.17	17.0487	BL	35.435	132.596	BL	894.867	49.0906	162.277	80.7975	BL	BL	2.12794	2.23262	100.84	BL	5.65158	16.0565	BL	BL	4.64678	BL	BL	BL	BL	6.65036	14.8436	418.364	46.538	29.2742	69.9208	17.0875	BL	84.784	1129.54	42.8321	0.182986	9.40911	14.707	NA	24.0486	8.27769	BL
2010-05-03	12.6937	4256.33	726.328	3527.52	21.5094	13.678	55.6977	157.753	BL	924.514	8.64231	96.2723	70.8187	BL	BL	0	2.45162	83.6049	0.685241	3.96634	14.0154	BL	BL	3.12255	BL	BL	BL	BL	3.06319	18.9419	740.292	58.2706	15.1205	70.8328	11.7898	BL	112.686	2184.88	73.0023	0.307727	12.3385	19.595	NA	31.6984	14.218	BL
2010-05-05	6.61947	2719.64	371.874	2347.76	20.3223	10.058	26.7486	116.314	BL	342.632	BL	45.9699	70.3481	3.91069	BL	2.67558	1.19776	59.2209	BL	1.67747	10.4201	BL	BL	1.18629	BL	BL	BL	BL	BL	11.538	274.395	58.8011	19.9852	39.1412	13.3716	4.97463	57.1765	743.835	29.4221	0.339323	5.97814	9.44867	NA	18.4228	7.77552	8.92347	0.0759088	27.837	0.269319
2010-05-07	14.2749	6168.03	1403.18	4764.86	27.6572	13.2527	37.1243	135.111	BL	1254.62	8.9081	135.26	120.743	10.2032	8.54023	BL	1.91358	114.531	2.76804	5.90487	13.3437	BL	BL	BL	BL	BL	BL	BL	3.76978	33.5128	990.018	94.0391	BL	66.158	12.5403	20.3734	193.602	2714.95	142.909	0.232446	12.5464	14.2852	NA	25.5565	29.183	BL
2010-05-09	12.1142	5505.61	1269.19	4236.42	40.3915	15.2088	40.0049	117.243	BL	973.299	14.0927	147.368	109.83	7.47672	BL	BL	2.48882	106.969	1.90927	6.37492	8.86908	BL	BL	4.17672	BL	BL	BL	BL	4.2746	25.8705	559.198	67.8546	BL	44.7988	6.78937	19.0624	109.975	1495.28	65.0337	0.145896	7.64041	8.1666	NA	14.1275	22.4392	BL
2010-05-11	12.5931	5671.9	1415.5	4256.41	30.495	27.8839	53.011	165.385	BL	1012.15	18.0133	153.691	191.387	BL	3.94443	BL	BL	79.2282	BL	3.30473	8.24372	BL	BL	3.66552	BL	BL	BL	BL	7.74682	25.7673	692.155	88.6982	10.3235	102.065	7.77219	38.1453	124.292	1965.21	74.3738	0.507631	9.33081	11.8848	NA	21.3605	18.5714	BL	0.164503	28.3259	1.74998
2010-05-13	14.729	6609.92	1532.23	5077.69	45.2946	26.8232	63.4314	195.224	BL	1396.86	15.8251	205.667	208.407	10.6607	BL	BL	3.09542	126.354	BL	7.15146	10.8501	2.04955	BL	3.05773	BL	BL	BL	BL	BL	32.3554	1055.47	159.22	12.0429	173.812	12.182	88.4905	135.753	3263.74	91.4833	0.818137	10.8073	11.8096	NA	27.3007	22.2768	BL
2010-05-15	13.1125	5047.19	952.395	4094.8	26.7294	27.1023	108.356	290.241	BL	1377.22	7.99773	166.659	171.36	12.4454	BL	BL	2.98308	121.428	BL	3.4631	10.1163	BL	BL	4.367	BL	BL	BL	BL	BL	16.5135	737.992	68.4443	4.01105	81.9108	7.02608	31.8988	81.3913	2142.67	46.7518	0.320821	4.81939	7.58146	NA	13.7491	10.103	BL
2010-05-17	17.8999	5797.7	929.516	4868.18	102.902	121.006	365.022	893.713	BL	1691.16	15.3556	220.104	451.472	24.7856	6.08767	BL	5.81326	263.182	1.48565	2.92094	10.3664	BL	BL	5.6867	BL	BL	BL	BL	BL	97.24	1106.32	92.0742	29.2669	253.296	15.1851	2.25436	180.391	3727.63	113.611	1.02136	9.69648	11.1523	NA	18.7023	71.4178	BL	0.221553	239.842	2.31003
2010-05-19	9.15555	4953.63	1056.18	3897.45	40.7169	29.3508	83.8325	236.171	BL	546.264	11.6482	97.4069	199.765	11.1004	BL	BL	4.54145	97.923	1.51324	4.96496	7.23833	BL	BL	4.79554	BL	BL	BL	BL	BL	31.3728	359.174	39.9324	4.68043	101.497	7.05028	53.5194	109.039	958.403	38.3751	0.355904	5.33496	6.80518	NA	12.3699	34.911	BL
2010-05-21	18.6009	7905.46	1646.04	6259.42	42.4001	31.1537	98.818	271.343	BL	1588.48	9.87377	199.088	212.233	12.2532	BL	BL	4.40463	134.05	1.97946	6.07055	11.497	BL	1.96078	4.08152	BL	BL	BL	BL	6.20658	43.059	1345.06	125.798	12.3329	239.823	13.6162	47.428	176.68	3934.25	167.357	0.517047	20.12	25.1666	NA	42.034	58.8602	6.38466
2010-05-23	16.575	6415.71	1378.34	5037.38	68.2902	67.425	189.557	517.283	BL	1280.3	12.8422	231.812	312.193	9.96131	5.83324	BL	3.68272	215.898	1.82121	7.62481	11.6529	BL	BL	BL	BL	BL	BL	BL	BL	71.4693	977.3	133.102	41.9591	296.105	10.8446	164.542	292.085	3254.41	191.083	0.311231	19.4838	20.4046	NA	47.146	53.2056	BL	0.130879	132.662	2.40847
2010-05-25	20.634	6502.65	1672.18	4830.48	62.8271	129.804	401.84	1025.04	BL	1285.56	13.7931	281.431	674.144	32.7925	BL	BL	8.60283	387.989	2.33259	8.9977	14.1104	2.37574	BL	4.1909	BL	4.57712	BL	BL	BL	74.5499	722.343	127.555	33.3901	381.766	13.0415	3.74169	213.211	2875.15	175.902	0.272618	14.5762	13.7402	NA	23.5243	46.6318	BL
2010-05-27	27.1469	4693.6	837.312	3856.29	83.856	84.5732	245.494	771.986	BL	2100.55	15.0544	175.76	724.646	24.0891	7.89672	BL	8.68137	280.873	2.2824	4.68775	14.8317	1.63127	BL	3.03228	BL	BL	BL	BL	BL	95.9015	1303.55	69.6219	45.915	392.625	22.4712	29.5355	198.541	4864.02	112.231	1.45035	10.1423	11.9675	NA	19.696	80.2045	BL
2010-05-29	12.3385	4139.82	795.403	3344.42	37.5112	40.0548	104.339	366.105	BL	557.468	13.0365	117.659	470.995	10.1982	5.34024	BL	5.92937	168.713	0.833704	5.62329	9.4732	BL	BL	3.02869	BL	4.33912	BL	BL	4.13383	29.7884	308.246	32.0042	18.0894	296.411	10.3579	221.876	185.588	895.414	54.1925	0.916132	13.0763	15.5199	NA	31.6875	33.4188	BL	0.0878163	64.9853	0.763726
2010-05-31	7.34596	3877.01	690.745	3186.27	23.7404	13.6335	28.22	97.5725	BL	401.569	7.94844	82.7734	177.401	BL	BL	BL	2.64405	54.0227	BL	1.67562	6.29733	BL	BL	BL	BL	BL	BL	BL	BL	5.66631	178.947	21.739	BL	52.8672	4.18708	5.1836	50.0106	417.044	15.7457	0.185255	5.5974	5.59767	NA	7.92547	15.7624	BL
2010-06-02	8.61683	2809.6	432.604	2376.99	18.9989	BL	18.6358	69.3283	7.70773	772.35	10.8245	51.5266	70.6588	BL	BL	BL	BL	66.9116	BL	3.06276	7.07374	BL	BL	BL	BL	BL	BL	BL	BL	6.47685	251.838	12.716	BL	37.7507	9.65501	BL	43.2926	552.524	11.5663	0.163434	3.34839	5.3267	NA	BL	BL	BL
2010-06-04	NA	NA	NA	NA	NA	NA	NA	NA	NA	NA	NA	NA	NA	NA	NA	NA	NA	NA	NA	NA	NA	NA	NA	NA	NA	NA	NA	NA	NA	NA	NA	NA	NA	NA	NA	NA	NA	NA	NA	NA	NA	NA	NA	NA	NA	NA
2010-06-06	NA	NA	NA	NA	NA	NA	NA	NA	NA	NA	NA	NA	NA	NA	NA	NA	NA	NA	NA	NA	NA	NA	NA	NA	NA	NA	NA	NA	NA	NA	NA	NA	NA	NA	NA	NA	NA	NA	NA	NA	NA	NA	NA	NA	NA	NA
2010-06-08	NA	NA	NA	NA	NA	NA	NA	NA	NA	NA	NA	NA	NA	NA	NA	NA	NA	NA	NA	NA	NA	NA	NA	NA	NA	NA	NA	NA	NA	NA	NA	NA	NA	NA	NA	NA	NA	NA	NA	NA	NA	NA	NA	NA	NA	NA
2010-06-09	9.26514	2953.07	727.231	2225.84	241.821	40.0318	20.3457	70.9938	BL	954.679	19.4342	74.6449	82.2247	BL	BL	BL	BL	63.3775	1.75898	3.45348	6.83083	BL	BL	3.24402	BL	BL	BL	BL	BL	140.477	363.713	33.674	20.8542	48.8235	5.23685	70.9935	207.183	1155.67	43.2464	0.223894	5.8435	4.88711	NA	8.70922	38.9659	BL	0.131365	25.3217	2.51729
2010-06-11	10.7831	3079.34	741.925	2337.41	222.349	51.9157	37.4816	120.088	BL	893.354	16.1703	70.6504	122.784	BL	BL	BL	BL	44.0599	1.88039	3.01425	4.90986	BL	BL	BL	BL	BL	BL	BL	BL	207.355	702.875	59.0528	51.6021	90.3405	17.2242	2.23501	252.381	2231.99	96.583	0.29202	7.23198	6.64414	NA	8.27349	84.4587	BL
2010-06-13	12.611	4418.83	972.142	3444.36	155.556	58.5204	71.323	93.4027	BL	1071.77	13.163	438.937	99.214	8.77591	BL	BL	BL	60.6461	1.9707	5.49321	10.1457	BL	BL	3.2566	BL	11.0513	BL	BL	BL	201.305	866.99	385.989	115.803	112.118	20.2735	2.78352	250.64	3127.03	147.35	0.728875	12.2355	11.9772	NA	16.1728	69.0001	BL
2010-06-15	10.3234	4635.37	837.297	3800.4	74.0643	29.0669	42.3604	128.047	BL	706.921	8.29166	76.3965	169.214	5.80484	BL	BL	1.92843	83.9474	1.71418	4.26597	8.05246	BL	BL	BL	BL	BL	9.98966	BL	BL	80.1403	562.712	54.1567	21.844	115.995	11.2935	BL	102.671	1664.05	86.6634	0.420967	11.0959	11.6139	NA	14.5636	40.1417	BL	0.305317	32.9806	1.40146
2010-06-17	12.2296	3828.93	683.904	3145.03	92.2626	22.4472	37.6239	125.37	BL	1250.9	10.1257	108.183	133.294	BL	BL	BL	2.37999	72.0748	BL	3.58921	11.3345	1.84178	BL	BL	BL	BL	BL	BL	BL	109.003	1032.44	80.8497	12.5411	124.024	11.1609	1.45043	100.43	3085.22	98.7557	0.570164	11.0418	12.4912	NA	15.8593	105.275	BL
2010-06-19	13.8032	5107.98	1283.97	3824	50.9288	34.83	105.401	273.246	BL	1026.63	9.54313	95.4733	155.218	7.75013	BL	BL	BL	129.923	1.66518	6.15984	9.76012	BL	2.14176	3.80335	BL	BL	5.97891	BL	BL	60.5712	1061.69	78.3138	11.1345	162.547	13.2358	3.18355	102.677	3109.63	112.229	0.613219	15.4736	17.9382	NA	22.7325	50.6719	BL
2010-06-21	9.6272	2363	276.768	2086.23	79.0915	21.9947	26.3037	90.9561	BL	899.478	7.71626	82.6951	52.3148	BL	BL	2.61924	BL	33.0273	BL	2.62216	8.14041	BL	BL	BL	BL	BL	BL	BL	BL	77.234	778.666	72.4008	12.6135	79.4092	7.56136	107.024	166.194	2189.51	54.6713	0.45716	10.3723	12.6125	NA	24.6774	82.2541	BL	0.166532	35.393	1.18069
2010-06-23	6.3416	3228.19	400.035	2828.15	11.9356	16.6057	33.3118	121.659	BL	288.2	BL	55.4488	140.69	5.07224	BL	BL	2.21422	68.1232	BL	3.76552	6.66351	BL	BL	BL	BL	BL	BL	BL	1.23225	16.4256	141.724	21.0097	BL	28.4161	5.69158	BL	52.731	439.255	13.8267	0.441839	2.07319	2.25501	NA	2.75224	9.64628	BL
2010-06-25	10.352	NA	NA	NA	104.32	27.3954	37.5101	125.065	BL	914.94	11.4352	70.6161	146.029	BL	BL	BL	2.13269	62.9958	2.04057	4.37793	7.79	BL	BL	BL	BL	BL	BL	BL	BL	85.6554	511.861	41.2868	11.7742	78.9551	7.61624	BL	109.459	1532.8	56.8417	0.362599	4.7347	3.79188	NA	5.10683	58.0502	BL
2010-06-27	12.4398	NA	NA	NA	42.3865	14.9837	48.5184	63.0363	BL	1203.78	8.95028	144.038	35.3811	4.21083	2.37567	BL	BL	46.3083	1.32651	3.94197	7.25529	BL	1.71908	BL	2.03284	BL	BL	BL	BL	43.5716	891.125	95.7292	11.9694	55.618	12.8523	1.50575	114.591	2493.4	96.0819	0.344161	9.12611	8.79898	NA	11.3303	61.09	BL	0.167856	45.0631	2.11391
2010-06-29	17.2436	NA	NA	NA	69.7978	18.5848	45.0323	150.961	BL	1940.32	13.3815	82.4285	107.295	5.46605	5.12914	BL	1.56774	92.8229	2.75776	4.49094	10.5353	BL	BL	BL	BL	BL	BL	BL	3.12774	81.9637	1462.3	57.3105	14.0499	76.0086	14.4214	2.08161	107.12	4387.95	116.143	0.594425	10.3504	11.8966	NA	17.1575	70.3831	BL
2010-07-01	15.9301	NA	NA	NA	16.314	14.8992	55.599	183.654	BL	1509.57	11.9563	97.8236	189.809	8.32839	BL	1.50289	2.42089	117.798	0.783022	6.56744	12.4473	BL	BL	BL	BL	BL	BL	BL	3.84114	26.392	955.58	56.7582	9.16359	103.341	17.0046	1.26368	84.9037	2776.5	72.7159	0.672655	9.52925	11.9886	NA	15.1373	16.5271	BL
2010-07-03	18.8495	NA	NA	NA	34.9236	22.3483	59.0881	576.943	BL	1858.82	10.1818	125.574	113.192	5.86826	3.46309	1.46339	2.18616	97.8243	2.36573	5.7321	11.3967	BL	BL	1.00184	BL	BL	BL	BL	5.05607	39.2782	1735.24	100.174	10.6668	140.935	26.2555	5.04815	133.271	5185.43	158.133	0.761035	16.9382	19.3121	NA	28.7889	44.7159	BL	0.359763	46.4481	2.36836
2010-07-05	NA	NA	NA	NA	NA	NA	NA	NA	NA	NA	NA	NA	NA	NA	NA	NA	NA	NA	NA	NA	NA	NA	NA	NA	NA	NA	NA	NA	NA	NA	NA	NA	NA	NA	NA	NA	NA	NA	NA	NA	NA	NA	NA	NA	NA	NA
2010-07-07	NA	NA	NA	NA	NA	NA	NA	NA	NA	NA	NA	NA	NA	NA	NA	NA	NA	NA	NA	NA	NA	NA	NA	NA	NA	NA	NA	NA	NA	NA	NA	NA	NA	NA	NA	NA	NA	NA	NA	NA	NA	NA	NA	NA	NA	NA
2010-07-09	NA	NA	NA	NA	NA	NA	NA	NA	NA	NA	NA	NA	NA	NA	NA	NA	NA	NA	NA	NA	NA	NA	NA	NA	NA	NA	NA	NA	NA	NA	NA	NA	NA	NA	NA	NA	NA	NA	NA	NA	NA	NA	NA	NA	NA	NA
2010-07-12	9.05409	3387.06	731.772	2657.61	87.5661	18.2735	16.2489	73.1433	BL	889.025	10.1517	60.5139	42.0407	2.95057	BL	BL	BL	51.7889	1.22853	3.04201	8.6254	BL	BL	BL	1.80613	BL	BL	BL	1.77675	109.618	682.719	48.3168	23.1573	95.9192	26.0519	18.7741	128.16	1734.04	118.584	0.606845	10.1945	10.4122	NA	18.951	59.3021	BL
2010-07-14	12.4837	4026.08	941.976	3081.77	152.721	25.7815	29.9759	95.6909	BL	1431.4	11.697	613.843	97.0655	3.36607	4.63457	BL	1.76764	93.1488	2.93227	5.53849	16.0391	BL	1.2627	0.91808	2.10242	BL	BL	BL	1.78699	145.404	893.262	377.132	24.72	87.2628	11.4549	3.24439	80.0114	2707.83	142.189	0.252131	9.42578	9.94426	NA	14.6993	81.4514	BL
2010-07-16	14.3415	5230.97	1211.8	4019.17	115.308	38.2421	106.593	264.848	BL	1458	6.83125	144.939	213.369	7.9032	4.24594	2.01307	3.48216	141.063	2.64399	5.71736	11.3637	BL	2.11571	1.1636	2.51104	BL	BL	BL	BL	106.291	1010.96	102.152	28.0182	111.532	9.53424	BL	90.5941	2670.13	126.014	0.301096	10.1284	10.0692	NA	14.2468	69.4604	BL	0.819948	73.5794	2.33284
2010-07-18	5.27631	1823.45	167.459	1655.99	324.176	48.4248	27.8694	79.1092	BL	346.136	227.035	55.2235	64.254	BL	BL	BL	BL	24.1593	0.67927	1.51697	3.13716	BL	BL	BL	BL	BL	BL	53.4699	BL	168.261	186.274	31.3247	25.8296	37.4591	113.438	BL	162.861	594.378	25.6896	0.241925	2.83661	BL	NA	3.82572	19.8647	BL
2010-07-20	8.61714	2979.65	611.748	2370.23	254.515	40.1014	18.1346	64.0687	BL	977.401	10.3384	55.9054	66.6551	BL	3.05959	BL	BL	43.2081	1.67969	2.78348	3.59425	BL	BL	1.09921	BL	BL	BL	BL	2.46039	200.896	646.041	36.4516	40.5168	59.6778	16.9028	BL	167.02	1734.25	75.9036	0.193705	6.14954	5.98734	NA	9.79358	53.3278	BL
2010-07-22	11.8179	4719.01	1141.96	3579.38	102.785	26.0091	49.0074	133.033	BL	1041.9	6.25162	73.9409	127.378	4.87387	4.04233	1.77299	1.60927	95.6554	2.37522	4.91141	8.5843	BL	BL	BL	BL	BL	BL	BL	BL	111.715	917.686	57.2495	38.2617	114.928	17.5327	33.1834	104.859	2299.03	124.306	0.396769	11.5719	11.7847	NA	20.5743	50.752	BL	0.165418	29.7008	2.30339
2010-07-24	14.9026	5349.4	1086.16	4263.24	240.626	56.0133	113.247	281.774	BL	1069.98	11.3794	241.683	213.716	6.03027	6.51515	BL	4.64067	119.167	2.42159	4.29045	14.5523	BL	BL	BL	BL	BL	BL	BL	4.25829	245.689	546.585	134.207	14.8276	129.407	30.9506	4.51841	307.208	2509.7	212.193	0.395834	8.28701	7.74405	NA	8.76451	53.5352	BL
2010-07-26	7.15206	2758.93	390.81	2365.79	91.0695	29.3776	48.0547	83.3051	BL	599.08	6.22385	164.267	71.3716	BL	BL	BL	1.31993	50.1296	0.986429	3.13995	4.2685	BL	BL	BL	1.64751	BL	BL	BL	BL	96.0248	374.402	102.701	7.75176	64.6637	14.7119	38.1393	151.977	1397.66	101.936	0.348967	7.85789	6.01675	NA	7.27297	38.0928	BL
2010-07-28	12.5438	4244.63	960.566	3284.07	97.8347	28.2888	77.5837	214.163	BL	959.585	7.91141	91.9007	173.166	8.11941	3.04664	BL	3.57088	109.501	1.59416	5.66019	7.22079	BL	BL	BL	BL	BL	BL	BL	2.40467	84.6511	608.221	56.2648	10.1938	94.9973	12.6239	4.3286	132.702	2077.34	118.743	0.462301	7.57795	7.1123	NA	6.62568	29.2905	BL	0.054287	54.0496	3.25799
2010-07-30	16.919	5337.58	1069.84	4267.73	61.832	32.6655	81.3774	221.318	BL	1202.03	13.1599	106.829	253.855	4.69697	3.67646	BL	4.1963	121.705	1.76795	5.24432	7.44436	BL	1.36696	BL	BL	BL	BL	BL	BL	71.7697	916.73	68.0486	10.4948	194.701	13.6869	23.3869	135.705	2997.25	152.598	0.580232	12.4346	14.589	NA	12.6422	41.1275	BL
2010-08-01	12.0541	3937.84	711.741	3228.42	139.183	28.3467	48.8629	158.837	BL	1002.39	BL	85.6624	206.184	7.69616	BL	BL	1.41634	87.0908	2.05846	4.10866	4.78666	BL	BL	BL	BL	BL	BL	BL	2.5119	105.423	672.369	47.8525	7.38724	128.386	9.90771	4.12365	143.808	2142.08	104.088	0.30691	9.73866	9.54429	NA	8.77383	37.9783	BL
2010-08-03	11.3753	3063.06	653.545	2409.51	111.23	29.6381	48.3586	150.554	BL	1312.94	7.82743	69.9064	121.45	4.37792	4.12841	BL	1.82063	75.2599	2.48559	3.24083	4.92703	BL	0.850883	BL	1.45507	BL	1.63467	BL	BL	76.3328	768.194	41.0495	6.97948	95.9875	12.8434	46.1893	101.883	2406.53	76.155	0.382931	7.05896	6.23734	NA	7.06661	50.1101	BL	0.130658	22.9972	3.42253
2010-08-05	7.20691	3126.14	644.3	2481.84	17.1722	12.6998	44.046	136.828	BL	473.042	BL	69.4953	219.304	4.37713	BL	BL	1.90408	72.4823	BL	3.65476	5.60559	BL	BL	BL	BL	BL	BL	BL	BL	20.4413	189.418	18.2333	5.09423	47.1219	16.7161	9.05286	78.0973	566.072	22.9297	0.379503	3.87003	5.07108	NA	5.35912	6.50904	BL
2010-08-07	NA	NA	NA	NA	NA	NA	NA	NA	NA	NA	NA	NA	NA	NA	NA	NA	NA	NA	NA	NA	NA	NA	NA	NA	NA	NA	NA	NA	NA	NA	NA	NA	NA	NA	NA	NA	NA	NA	NA	NA	NA	NA	NA	NA	NA	NA
2010-08-09	9.76032	2983.66	346.504	2637.15	15.3012	10.2567	30.3067	80.9107	BL	1066.77	BL	81.442	43.0258	BL	BL	2.06785	BL	29.0406	1.00674	1.45634	4.94067	BL	BL	BL	BL	BL	BL	BL	2.65961	12.8733	580.973	38.3269	3.65163	28.792	6.05744	BL	18.1414	1629.93	82.0704	0.164542	7.13285	6.17001	NA	6.40087	12.3151	BL	0.0942211	16.7185	1.06377
2010-08-11	13.8085	3272.38	567.491	2704.89	49.4095	20.4817	34.2555	99.5939	BL	1581.54	15.515	71.955	85.8538	BL	4.76884	BL	BL	49.2211	2.46766	2.36458	5.01824	BL	BL	BL	BL	BL	BL	BL	BL	32.9265	859.018	36.7764	6.94736	33.1728	9.34484	BL	28.2126	2711.73	75.02	0.234951	4.90436	4.98009	NA	4.77408	25.9243	BL
2010-08-13	15.7998	4340.46	651.302	3689.16	41.3541	18.9658	47.3713	161.809	BL	1367.08	11.5367	84.6858	312.447	5.01688	4.58154	BL	1.87788	66.6739	1.67074	2.94999	5.30086	BL	BL	BL	BL	BL	BL	BL	BL	43.5181	1055.14	52.9773	6.91991	168.288	7.71675	0.9441	56.9885	3439.02	97.8852	0.437623	8.16883	8.20951	NA	9.40903	25.3393	BL
2010-08-15	12.3156	3793.63	525.665	3270.29	44.114	17.2786	62.3901	149.783	BL	1444.56	BL	77.5326	88.3593	4.35489	3.60455	BL	BL	68.1091	1.69658	2.52834	4.8624	BL	BL	BL	BL	BL	BL	BL	1.73209	41.7482	961.993	40.1326	6.85965	118.128	6.80322	BL	43.6909	2967.67	90.5673	0.222999	6.98974	7.1055	NA	6.7749	29.4366	BL	0.0537036	34.5133	2.98872
2010-08-17	13.198	4872.69	1172.24	3700.46	32.6411	23.3845	91.271	240.146	BL	1159.87	15.4916	124.632	194.916	8.67519	BL	BL	3.12581	116.038	1.36018	4.81893	8.40775	BL	BL	BL	1.44252	BL	BL	BL	2.42705	34.1159	737.25	60.2698	7.35751	96.9009	15.5655	BL	66.4515	2191.81	103.497	0.322252	7.43224	7.35981	NA	7.69231	17.682	BL
2010-08-19	12.0718	4788.79	807.047	3981.74	24.3706	28.897	111.879	286.985	BL	877.266	13.5071	104.954	215.059	9.58551	BL	BL	1.96262	119.428	1.13144	4.25773	6.666	BL	BL	BL	BL	BL	BL	BL	BL	39.83	681.93	59.5108	9.83051	149.393	18.4649	31.1177	87.1111	2042.74	134.667	0.377114	9.94103	10.0778	NA	14.1596	16.4914	BL
2010-08-21	13.8029	5602.71	955.88	4646.83	28.942	27.1936	95.2664	242.324	BL	1138.8	8.73507	158.084	202.74	8.46417	2.72063	2.02326	1.47133	112.551	1.39946	4.61016	8.83263	BL	1.09367	BL	1.62144	BL	BL	BL	BL	51.1496	815.211	95.9588	8.90913	187.386	26.9767	81.8952	92.5459	2669.7	160.953	0.336475	11.4637	12.4325	NA	15.5548	18.3247	BL	0.158505	95.854	2.87725
2010-08-23	12.4109	3428.27	472.143	2958.45	93.3064	22.996	36.152	98.4343	BL	1426.46	9.7972	89.4842	55.1196	BL	2.52817	BL	1.07159	45.2389	1.15639	1.53691	8.31459	BL	1.12782	BL	1.55046	BL	BL	BL	BL	121.742	1167.52	73.9744	10.7892	86.8216	14.5495	35.8793	78.3234	3764.06	139.597	0.249982	9.94817	12.0636	NA	14.2313	45.1152	BL
2010-08-25	11.9266	3281.74	623.321	2658.42	63.6702	16.5369	40.5911	109.475	BL	1440.51	5.9099	93.5371	88.2528	BL	4.54138	BL	1.293	54.156	1.9885	2.69869	8.90115	BL	BL	BL	BL	BL	BL	BL	2.3288	72.5559	1015.92	61.3955	8.98878	57.9479	13.3933	5.44965	53.5006	3171.69	114.153	0.208666	7.40981	8.86308	NA	9.67468	38.1694	BL
2010-08-27	14.0881	3818.94	897.752	2921.18	56.3202	26.5553	88.4276	220.538	BL	1708.22	8.86464	166.673	111.334	6.72481	4.10984	BL	2.43419	109.423	1.54483	4.44108	6.8001	BL	BL	1.32971	BL	BL	BL	BL	3.00185	68.5572	1108.55	88.0282	7.37551	68.006	19.7955	1.60743	53.4896	3658.33	95.7866	0.281592	6.43113	6.77283	NA	8.56084	33.0738	BL	0.0769174	57.5164	3.45998
2010-08-29	15.0261	3216.56	660.522	2556.04	90.8287	33.0013	98.6636	207.254	BL	2263.91	9.62117	186.8	82.434	6.99555	6.1026	BL	1.45329	81.0303	2.9701	3.46924	9.16387	BL	BL	BL	BL	BL	BL	BL	2.83115	135.534	1406.62	115.503	7.94318	67.4567	38.2756	BL	54.231	4746.93	100.35	BL	6.25271	7.50244	NA	12.2398	39.1378	BL
2010-08-31	6.71714	2786.29	548.885	2237.4	134.876	25.2451	24.8612	74.5763	BL	656.067	14.9373	86.9941	57.0489	5.71288	BL	BL	BL	42.4997	BL	2.23022	5.36535	BL	BL	BL	BL	BL	BL	BL	BL	102.741	528.348	59.8767	8.88807	43.621	13.7751	5.80162	99.6672	1534.12	77.0805	0.255772	6.27175	7.71944	NA	8.10682	43.1365	BL
2010-09-02	13.6574	3635.33	1004.77	2630.56	130.967	32.4885	56.5389	154.065	BL	2040.67	10.2208	173.659	93.9638	4.81712	2.29253	BL	2.23166	85.8525	2.07096	3.6666	10.9065	BL	2.0885	1.78374	2.97302	BL	BL	BL	BL	137.068	1391.01	120.561	11.6591	71.852	35.7102	BL	74.7043	4765.53	96.6761	0.312104	5.53415	6.97158	NA	8.85944	52.8109	BL	0.693929	29.9773	3.36098
2010-09-04	10.2567	3881.94	741.965	3139.98	302.357	56.8031	61.9585	211.199	BL	1272.83	38.101	90.2442	176.905	5.12033	3.2502	BL	2.56493	83.0511	2.28532	3.61941	8.41425	BL	0.995736	0.953925	BL	BL	BL	BL	BL	264.373	880.583	68.6116	15.2425	93.7615	70.8345	BL	182.454	3064.43	94.8038	0.348801	5.38944	6.20633	NA	6.65917	49.3102	BL
2010-09-06	3.69113	1456.05	162.817	1293.23	72.2086	13.7758	9.12556	39.3955	BL	399.24	BL	30.3696	36.4458	BL	BL	BL	BL	14.5075	BL	1.3672	3.40843	BL	BL	BL	2.02093	BL	BL	BL	BL	149.366	310.151	58.2212	9.48666	42.3816	141.838	BL	100.231	814.729	26.0121	BL	BL	6.21184	NA	5.13965	14.2502	BL
2010-09-08	6.65662	3014.22	637.265	2376.95	63.9378	13.0468	10.4576	54.8448	BL	645.738	BL	69.068	69.3267	BL	BL	BL	1.32766	49.9736	0.512438	2.58008	13.2173	BL	1.08581	BL	2.29648	BL	BL	BL	BL	77.8464	416.173	33.2128	8.74415	29.3316	21.4323	30.0012	65.9475	1137.34	57.2217	0.3061	4.18512	5.95328	NA	9.9954	14.3501	BL	0.109546	11.6359	1.16828
2010-09-10	11.9378	3529.41	822.954	2706.46	60.432	19.6267	46.39	133.445	BL	1191.3	9.83925	182.668	118.138	BL	BL	BL	1.75132	86.4309	BL	4.45392	13.8988	BL	1.65073	BL	1.95155	BL	BL	BL	BL	39.1474	786.106	79.5655	10.5083	61.7145	12.258	18.647	49.2334	2045.84	76.8412	0.245577	7.52377	9.72584	NA	17.3791	14.8757	BL
2010-09-12	14.7122	3238.17	548.696	2689.47	63.081	19.8758	54.9381	140.602	BL	1660.55	7.73329	235.301	78.6981	4.64312	BL	BL	3.81513	73.8182	0.646128	2.08562	15.0044	BL	2.59127	BL	BL	BL	1.5732	BL	3.1192	38.3277	1213.39	115.452	13.5924	72.2499	10.4699	34.6001	51.4463	3026.27	92.8737	0.306456	11.0705	13.4214	NA	25.0123	14.8405	BL
2010-09-14	14.6432	3529.54	1185.87	3415.06	31.3476	28.0345	38.0995	76.7042	BL	1411.95	14.2978	309.312	47.9674	BL	BL	BL	2.75461	67.0141	1.09109	4.76079	15.1215	BL	BL	1.05827	BL	BL	BL	BL	6.75515	18.2326	1025.37	160.982	BL	37.0491	4.97044	25.5834	152.171	2451.26	77.8117	0.165412	9.08308	9.35952	NA	21.0038	9.3511	BL	1.2787	21.3826	1.02633
2010-09-16	7.09207	2941.9	980.633	1961.27	34.9416	11.2165	46.2918	115.803	BL	495.63	8.40077	77.7912	43.5652	BL	BL	BL	BL	49.5239	BL	2.63295	8.79503	BL	BL	BL	BL	BL	BL	BL	2.54591	25.3173	430.242	43.9744	BL	20.3962	10.7392	13.6612	61.6353	1165.74	46.4859	0.276532	4.52049	6.8434	NA	9.78681	10.0142	BL
2010-09-18	10.7105	4936.28	1255.13	3676.83	41.7822	14.1862	19.6562	69.4893	BL	722.851	10.2517	118.188	73.5342	5.37886	3.65316	BL	1.76796	74.357	1.44109	5.3564	9.13017	BL	BL	BL	1.97954	BL	BL	BL	BL	33.3496	594.633	59.4796	BL	50.7091	8.03929	19.6352	84.7824	1412.95	73.4455	0.346048	10.8608	11.5015	NA	20.2787	14.6405	BL
2010-09-20	8.75521	3136.41	684.74	2451.67	25.0275	6.7107	18.7546	57.2357	BL	726.433	7.65383	110.01	23.6663	BL	BL	BL	BL	34.5833	0.98404	2.42972	18.9259	BL	BL	BL	BL	BL	BL	BL	3.40393	13.549	418.371	40.2428	BL	20.2424	6.90336	12.0712	53.3255	997.318	42.5087	0.298311	5.66656	6.69573	NA	11.1181	8.97327	BL	0.127019	9.50516	0.825434
2010-09-22	25.0699	4935.65	797.049	2557.47	19.4188	10.0093	25.4979	84.4215	BL	3133.86	BL	161.431	47.728	BL	BL	BL	3.14034	66.718	0.962879	4.0466	19.1532	BL	BL	2.70797	BL	BL	BL	BL	6.15646	14.7159	1611.05	70.3386	4.25974	33.9857	31.4482	BL	100.421	6365.42	82.4143	0.220882	7.883	12.4443	NA	18.0204	12.4905	BL
2010-09-24	21.8128	4964	965.583	3998.42	25.7098	11.1323	26.5654	93.6454	BL	2676.28	8.56706	203.179	70.8455	4.16653	BL	BL	2.08578	96.8268	0.816447	6.22562	16.4931	BL	BL	4.09766	BL	BL	BL	BL	7.4136	14.7366	1765.38	119.123	5.44461	52.6301	24.6766	4.39648	64.2069	7186.36	113.345	0.244137	9.79371	16.849	NA	21.3817	16.6203	BL
2010-09-26	13.525	3052.22	384.498	2665.57	105.826	11.8493	20.6788	82.3741	BL	1744.49	6.01073	117.791	31.7009	BL	BL	BL	1.9718	43.6938	1.27915	2.13528	13.5258	BL	BL	3.89874	BL	1.65018	BL	BL	5.92381	38.1685	512.273	30.4582	3.45396	6.76079	15.9312	BL	46.0279	1859.16	36.6426	0.182368	4.69338	5.41497	NA	7.81284	12.8222	BL	0.136287	13.4505	1.54416
2010-09-28	22.8241	6066.95	1200.86	4866.09	52.6421	18.91	42.6682	144.753	BL	2578.08	74.6222	330.119	120.374	4.14081	BL	BL	4.77269	123.209	0.855994	6.93525	25.9088	BL	1.15726	4.79629	2.04667	BL	BL	BL	13.1468	54.6289	1739.77	216.533	12.7466	92.6087	26.967	BL	128.703	7259.58	159.727	0.364786	13.3642	22.4105	NA	26.4249	23.3925	BL
2010-09-30	26.5105	6614.35	1427.85	5186.5	43.4789	14.9021	51.9007	165.188	BL	3415.58	12.5237	261.41	169.783	8.29529	4.19607	2.42783	3.71283	138.538	2.46921	8.00793	22.4415	0.968359	1.33271	3.95342	BL	BL	BL	BL	7.64743	41.2738	2340.8	167.55	10.6832	119.983	34.8353	BL	185.312	9163.24	150.395	0.386307	10.8854	17.4113	NA	22.7909	23.8322	BL
2010-10-02	18.0754	5992.67	291.64	4739.69	46.1972	15.5455	65.6815	185.298	BL	1884.15	10.4551	209.655	87.3091	4.72814	BL	BL	2.09399	104.268	1.45365	4.20419	15.8171	BL	BL	3.36828	1.78293	1.73683	3.27307	BL	6.54864	36.2417	1297.82	116.033	7.44036	68.0579	28.4521	BL	122.803	5300.89	103.476	0.580094	9.45199	14.1691	NA	18.2487	36.1662	BL	0.173988	34.5392	1.71907
2010-10-04	11.1519	4499.57	907.259	3592.31	39.426	12.3809	25.4948	67.6159	5.6961	1079.67	10.4125	121.51	51.7433	BL	BL	BL	BL	67.0022	1.06701	4.4453	11.1183	0.863834	BL	2.62229	BL	2.49488	BL	BL	2.94911	24.8297	674.339	50.9405	4.76821	25.0305	22.3519	BL	282.559	2324.92	60.0612	0.168238	6.39885	6.50886	NA	9.50507	21.2518	BL
2010-10-06	17.8139	8424.7	1913.92	6510.78	61.8052	12.3623	27.5344	103.75	BL	1358.89	20.8756	223.275	91.9909	5.09786	4.57522	BL	4.03936	135.274	2.79812	8.37591	20.2901	2.13314	BL	5.40867	BL	BL	2.48061	BL	BL	64.3704	1065.81	152.821	10.7216	98.6721	32.723	3.7565	260.829	4175.09	138.116	1.00062	14.0853	17.655	NA	23.6815	40.1722	BL
2010-10-08	19.1508	8448.46	2030.57	6420.06	47.8295	12.3879	29.282	119.811	BL	1649.83	13.1918	235.677	89.7234	5.16649	4.09098	BL	3.39999	135.261	2.39596	8.11856	17.6055	BL	1.05443	3.78208	BL	BL	BL	BL	6.04411	38.5603	1226.26	163.613	7.67913	87.8322	32.5478	29.6343	232.175	4915.25	134.347	0.861236	14.3324	17.3116	NA	27.1546	51.6276	BL	0.197355	71.52	3.43074
2010-10-10	6.65614	4708.51	1308.88	3403.95	29.7278	7.37078	16.3497	49.5697	BL	356.317	5.73396	79.0062	29.4604	BL	BL	BL	BL	63.7556	BL	4.52329	12.9299	BL	BL	1.76383	BL	BL	4.15563	BL	2.3563	19.0315	232.901	38.4191	3.41572	26.56	16.1195	1.79737	78.8695	837.618	36.1334	0.116662	3.23628	3.41474	NA	5.03778	9.79889	BL		d.l
2010-10-12	8.27191	4844.93	1563.86	3281.08	36.5052	13.5529	15.8131	60.6189	BL	492.093	8.53281	68.1771	67.4983	BL	2.41448	BL	3.19157	88.8447	0.522477	6.13922	14.5316	BL	BL	1.63864	BL	BL	BL	BL	5.70425	35.3618	373.388	43.5643	7.1308	65.5929	18.1351	105.648	204.21	1400.82	64.1819	0.304885	5.61034	3.71083	NA	11.5418	12.3855	BL		d.l
2010-10-14	7.70325	5399.47	1032.38	4369.25	25.9791	6.25545	18.4119	59.451	BL	298.712	15.2305	101.825	77.6759	BL	BL	BL	BL	63.3445	BL	3.75797	7.27022	BL	BL	BL	BL	BL	BL	BL	BL	12.7625	103.085	23.3855	2.35821	15.1595	18.7715	5.68354	91.2573	363.075	8.84136	0.18923	2.49379	2.04094	NA	3.85621	3.1903	BL	0.0701935	d.l	0.63588
2010-10-16	8.84629	5773.85	1090.83	4678.7	18.9861	8.27243	17.1127	68.6753	BL	292.458	5.04766	146.3	82.9074	BL	BL	BL	1.71484	96.0725	BL	5.94563	10.9772	BL	BL	2.91225	BL	BL	BL	BL	3.8309	22.2071	214.33	89.4013	5.07628	58.707	25.0124	2.1385	267.754	802.439	35.4924	0.301025	6.09111	8.49786	NA	10.8407	8.96069	BL		d.l
2010-10-18	4.92581	2709.11	200.915	2508.2	20.8639	6.40224	7.06495	33.8085	BL	324.554	6.63539	62.2966	21.0077	BL	2.23941	BL	BL	16.8341	BL	1.14952	5.35442	BL	BL	1.38023	BL	BL	BL	BL	1.71686	10.2708	108.807	13.067	1.55354	12.6451	18.2029	BL	49.5378	321.911	9.21619	0.197663	1.96937	BL	NA	4.14543	BL	BL		d.l
2010-10-20	19.8787	12005	2294.28	9712.87	38.5052	20.0156	32.0714	110.066	BL	690.719	28.7721	291.146	201.095	4.98345	BL	BL	BL	146.992	BL	9.1147	18.4492	1.65313	1.1647	1.70339	BL	BL	BL	6.77908	BL	25.3636	464.032	170.494	7.03964	133.036	29.3292	9.75343	728.172	1826.55	53.9648	0.285843	11.6393	13.5221	NA	17.8441	9.91076	BL	0.251376	d.l	1.70002
2010-10-22	9.75462	6576.91	1915.84	4663.24	38.6992	9.56623	24.7618	78.5965	BL	352.91	11.0713	96.165	48.5765	BL	BL	BL	BL	89.4669	0.809306	6.22392	7.22999	BL	BL	BL	3.08252	BL	BL	BL	3.12298	31.8447	213.123	42.8434	4.65801	39.8467	20.958	6.93166	159.698	782.422	35.8225	0.140763	4.38453	5.17738	NA	7.41354	8.57059	BL		d.l
2010-10-24	3.93894	3173.48	782.028	2391.45	13.2746	BL	BL	30.3252	BL	169.639	BL	41.5317	20.6651	BL	BL	BL	BL	59.0136	BL	4.42929	6.73454	BL	BL	BL	BL	BL	7.05153	BL	BL	6.05722	42.8391	8.70363	0.873296	0.830348	16.1874	63.5399	47.772	140.356	3.8135	0.198329	BL	BL	NA	2.47743	1.62343	7.71755
2010-10-26	17.9528	7353.12	1674.11	5679.01	31.6946	13.4505	45.1838	115.282	BL	1705.44	17.2678	224.861	76.2662	BL	BL	BL	3.2365	133.246	0.639818	11.0027	28.612	BL	BL	4.21561	BL	BL	BL	BL	18.3694	22.5232	1112.67	145.771	4.73032	32.581	23.217	5.68515	147.041	3718.42	72.3395	BL	7.79081	11.4536	NA	18.0591	10.4251	8.49064	0.286328	47.417	0.840602
2010-10-28	22.9165	10641.7	2421.21	8220.45	30.8299	16.2637	46.8325	140.071	BL	1665.51	21.7613	280.326	165.768	5.67927	BL	2.68278	3.59839	217.695	1.94289	14.2257	26.9043	0.873122	BL	3.81405	BL	BL	2.44293	BL	4.52822	44.544	1243.71	230.983	8.5293	123.688	35.792	52.1349	448.889	4444.24	99.9673	0.602818	12.6551	17.7495	NA	29.2407	15.0582	6.56055
2010-10-30	17.864	7435.2	1410.57	6022.47	70.3094	12.6411	20.6579	81.3843	BL	1423.8	18.2499	201.271	57.1112	3.87621	BL	BL	1.50173	80.5092	1.08255	6.16677	17.5327	BL	1.11246	4.07791	BL	BL	BL	4.12459	8.22298	65.252	1102.81	141.045	7.45162	58.4494	23.5679	32.1832	755.566	3244.5	92.0813	BL	12.7312	18.9402	NA	28.8771	15.2611	BL
2010-11-01	21.8692	11708.4	2069.49	9638.9	24.1849	12.6084	20.1605	66.5762	BL	930.75	53.696	349.091	89.1525	BL	2.3591	BL	1.61179	138.75	1.12081	8.73097	17.6812	0.893877	BL	3.34546	BL	BL	BL	BL	4.00471	22.2943	720.739	209.853	4.41058	47.7938	20.0251	7.69042	882.3	1955.84	74.103	BL	14.352	20.0605	NA	26.5871	10.7807	BL	0.246835	22.3708	1.13203
2010-11-03	7.00168	5879.02	1568.6	4310.42	16.1669	BL	15.892	50.7263	BL	96.0622	17.4501	91.392	61.6387	BL	BL	BL	1.61675	96.709	0.490793	7.59692	8.22116	BL	BL	BL	BL	BL	BL	BL	1.95249	9.68378	44.0684	39.7669	1.50919	19.1214	15.637	5.28556	146.827	162.571	6.8906	0.198695	4.28074	3.95599	NA	5.89167	2.1399	BL
2010-11-05	8.93327	5749.39	1743.61	4005.77	273.399	40.0978	18.3197	65.5359	BL	179.803	238.251	100.882	97.2413	BL	BL	BL	BL	95.828	0.462899	6.50362	13.8408	2.56	BL	1.45557	BL	BL	BL	BL	2.56038	142.223	33.543	32.7744	9.77337	29.1146	143.584	BL	246.08	228.606	7.48619	0.252723	2.55305	2.61685	NA	3.58501	3.77712	BL
2010-11-07	12.0669	4605.92	1054.26	4847.88	18.2565	BL	13.1895	51.0099	BL	505.704	19.9725	143.521	72.9048	BL	BL	BL	BL	57.1521	BL	3.25655	6.27983	BL	BL	2.5667	BL	BL	BL	BL	2.2821	17.4024	484.38	89.956	8.6419	57.506	30.4142	5.91483	886.715	1036.94	52.8334	BL	9.03495	12.3876	NA	18.4696	5.55435	BL	0.111811	18.6036	0.641877
2010-11-09	3.13466	2523.64	319.776	2206.02	52.2042	7.80651	7.73196	39.5903	BL	127.211	17.2722	51.725	35.396	BL	BL	BL	BL	16.9979	BL	1.04201	3.25119	BL	BL	BL	2.34767	BL	4.50045	BL	BL	20.5314	36.5035	12.2053	2.54294	13.863	14.678	50.3266	73.4633	119.085	4.55465	0.162212	1.56845	BL	NA	4.46324	BL	BL
2010-11-11	19.9385	12523.6	2503.42	10020.2	48.2318	13.9545	34.0134	110.591	BL	1060.8	19.5411	254.839	118.581	7.85641	BL	1.39451	2.83478	153.19	1.14517	9.20761	20.1793	BL	BL	3.29355	BL	BL	BL	BL	4.49491	56.3088	695.983	214.123	11.5137	81.4295	NA	NA	NA	NA	NA	NA	NA	NA	NA	BL	BL	BL
2010-11-13	33.8465	20575	2948.54	17624.3	64.1606	13.298	36.0081	144.261	7.72432	860.397	45.5084	484.927	153.582	5.17773	2.55025	1.5253	5.80282	193.705	4.29332	11.5824	34.7618	1.55573	BL	8.83474	BL	BL	BL	BL	18.9273	58.6174	659.033	437.937	10.5526	132.958	21.7568	BL	1168.17	2205.84	173.838	0.260833	19.5152	16.9422	NA	21.9237	19.0512	BL	0.837228	30.629	2.86001
2010-11-15	15.5344	8387.37	1924.58	6462.79	45.09	8.81258	15.6869	72.2026	BL	868.804	9.37221	208.394	66.6914	BL	BL	BL	1.53915	88.2663	1.3422	6.29737	11.0009	BL	BL	4.37135	BL	BL	BL	BL	1.8884	48.4633	616.116	173.612	6.48172	60.9736	17.0916	6.40337	83.6033	2229.64	104.801	0.235327	10.7671	10.3693	NA	18.261	19.7424	BL
2010-11-17	25.2481	14252.4	2628.84	11623.5	43.9011	14.6674	51.804	190.966	BL	1210.44	17.1188	320.291	112.224	4.70241	3.97627	BL	4.69893	165.666	2.75021	12.6856	18.0808	2.10168	1.05889	6.73878	BL	BL	BL	7.10513	8.91974	51.4465	839.722	266.183	8.75496	95.8813	20.4442	1.71848	228.116	2982.21	144.156	0.461837	14.7416	12.2531	NA	19.7572	27.504	BL
2010-11-19	34.1781	20658.9	3650.9	17008	46.5525	16.3888	64.2702	234.678	BL	1099.73	24.5154	512.858	175.944	7.39828	2.98204	3.87791	5.52829	257.951	3.86665	15.542	34.9967	BL	BL	6.2883	BL	2.10718	BL	BL	18.3069	46.3895	789.441	400.065	10.2952	146.567	21.6344	2.5417	1007.71	2497.62	183.27	0.306371	18.3694	16.7996	NA	23.3986	27.9284	BL	0.448989	51.0252	3.77529
2010-11-21	28.8266	17846.4	3268.17	14578.3	45.3803	14.3314	60.9024	189.472	5.58944	995.427	27.2333	509.038	100.117	6.08774	6.74488	BL	3.63282	168.886	3.12658	10.2631	24.3808	1.00515	BL	5.46831	2.12874	BL	2.80947	BL	7.66818	44.4077	680.948	417.254	6.87764	80.3489	17.8098	BL	561.344	2400.63	149.047	0.201636	17.5244	15.6903	NA	21.6956	25.8287	BL
2010-11-23	10.5542	5329.74	1432.36	3895.23	236.408	36.918	87.2512	226.228	5.49943	793.58	24.0457	148.821	127.362	6.99504	2.60842	1.63993	2.20433	107.503	1.83094	4.61925	9.89558	BL	0.920332	3.43836	BL	BL	BL	BL	2.27356	195.549	418.403	95.6625	16.0211	54.6641	17.6816	BL	178.804	1832.13	76.83	0.349287	5.75681	4.57231	NA	9.2726	16.6212	BL
2010-11-25	17.4489	11478.7	2782.72	8695.99	131.594	25.7396	27.9551	83.2326	BL	656.196	18.0391	275.453	90.2299	BL	BL	2.1997	2.72175	119.844	1.42892	7.87443	16.5319	2.43701	1.99481	6.57273	BL	BL	BL	BL	BL	135.974	357.399	221.805	20.5709	85.8479	21.402	1.51452	209.549	1669.72	93.9403	0.28537	12.9689	11.0984	NA	17.7153	19.0622	BL	0.367349	27.5652	2.296
2010-11-27	9.26548	4396.13	1049.89	3346.24	111.27	19.6794	35.8617	102.25	BL	605.051	10.798	107.516	75.6545	BL	BL	BL	BL	74.2583	1.33499	4.78247	14.0812	0.90896	1.51622	3.54656	BL	BL	BL	BL	BL	90.9159	324.125	55.0162	14.5571	30.9201	26.6938	BL	223.938	1143.37	38.9191	0.225008	3.79686	3.73106	NA	5.2772	12.1783	BL
2010-11-29	8.95586	4380.61	851.065	3529.54	114.69	16.2329	26.2232	73.3385	BL	505.486	14.5596	184.648	42.1192	BL	2.7283	BL	BL	60.9342	0.800751	3.26126	10.3302	BL	BL	5.52267	BL	BL	BL	BL	2.09857	83.8945	291.721	96.1882	12.2137	29.8537	24.0653	BL	306.344	928.704	40.0495	0.169687	5.25471	4.95645	NA	8.26434	8.63737	BL
2010-12-01	5.59751	4041.33	1373.75	2665.42	36.1735	14.4771	10.0275	54.3213	BL	182.896	6.21494	47.638	35.009	BL	BL	2.28732	BL	51.2878	0.821414	5.91499	106.869	BL	BL	1.88364	BL	BL	BL	BL	2.58361	18.2682	76.1668	19.1037	4.76022	14.3932	17.9199	BL	105.563	193.443	5.08483	0.111133	2.02153	BL	NA	2.13719	BL	BL	0.0703477	10.4916	0.542973
2010-12-03	26.93	12142.3	2755.89	9386.44	34.4228	11.4149	28.4908	110.884	BL	723.702	29.3536	327.803	126.247	4.02022	BL	BL	3.42839	133.46	1.95891	8.39432	20.3819	1.09417	BL	3.68109	BL	BL	4.27104	BL	3.63086	36.4614	1130.4	271.478	14.4077	119.834	136.589	BL	3274.59	1826.87	75.3871	0.356028	16.4147	16.8464	NA	22.0584	10.5616	BL
2010-12-05	6.72294	4492.77	1077.83	3414.93	13.0934	BL	9.30423	37.7321	BL	266.613	12.4473	97.6827	26.9173	BL	BL	BL	BL	46.0062	0.655031	3.4845	24.6172	BL	BL	BL	BL	BL	BL	BL	2.35029	18.7736	169.028	48.6441	2.26361	18.2261	31.9282	BL	158.822	464.235	6.25677	0.182274	5.04278	3.78951	NA	6.07601	BL	BL
2010-12-07	50.9059	23572.3	3677.03	19897.4	52.0717	BL	17.4222	83.702	5.8287	871.186	240.518	500.348	66.3414	3.19717	4.51328	1.4528	3.28044	150.529	7.28981	10.9917	34.5999	BL	BL	9.57071	BL	BL	BL	BL	17.3666	94.8812	1914.29	445.635	8.32069	91.2284	497.167	BL	5728.84	2159.1	135.867	0.481619	28.9069	31.5722	NA	36.7025	17.7999	BL	0.783498	15.9395	4.42094
2010-12-09	17.6974	10248.2	3157.61	7090.58	29.5422	20.997	60.1655	265.613	BL	328.254	19.2764	199.98	400.746	10.3124	BL	2.80711	5.27238	283.926	1.15067	17.2744	33.7675	1.47489	0.657426	1.95453	BL	BL	BL	BL	BL	37.0069	266.715	145.499	9.96283	262.22	37.4801	31.5692	1282.1	812.006	32.4032	0.679912	10.4661	7.90677	NA	16.6609	6.36869	BL
2010-12-11	40.9503	21052.5	3759.99	17290.3	33.0304	BL	26.3535	113.067	BL	559.81	40.5564	469.996	122.051	4.70087	BL	2.17285	4.88163	228.38	2.46902	16.1691	30.2371	BL	BL	4.33929	BL	BL	2.59499	BL	9.4038	44.6131	1123.25	406.111	8.37927	213.49	119.71	51.101	4144.51	1433.51	81.5391	3.7757	25.7766	25.6357	NA	48.3649	12.999	BL
2010-12-13	6.40258	2415.26	289.485	2127.93	66.927	7.1975	BL	30.3062	BL	642.879	5.67081	50.3675	14.1642	BL	BL	BL	BL	12.9869	1.05237	BL	8.07377	0.910734	BL	0.908559	BL	BL	BL	4.03575	BL	39.7452	321.709	27.9305	2.63044	13.4063	15.2003	12.6011	117.086	986.167	10.7776	0.144172	3.47167	3.6813	NA	7.39816	BL	BL	0.0699804	9.01472	0.987804
2010-12-15	15.1603	3971.78	542.097	3427.52	80.4202	12.1825	7.74509	30.0523	BL	1478.5	6.66642	123.217	19.0771	BL	BL	BL	BL	22.1103	BL	1.31196	18.6532	BL	BL	2.08728	BL	BL	BL	BL	3.56269	61.6836	1048.01	95.5913	6.15688	27.7758	44.3163	114.214	657.154	3184.23	38.5666	0.116669	7.81647	10.853	NA	22.937	8.5741	BL
2010-12-17	16.5202	5663.99	1080.09	4586.06	30.9723	BL	10.3345	41.4628	BL	1025.64	16.3084	148.814	19.0675	BL	BL	BL	BL	28.3047	1.98638	2.24072	22.4994	BL	BL	4.0492	1.73392	BL	BL	BL	8.17489	28.0662	985.243	109.965	2.79795	15.6073	36.3116	5.08268	1482.54	2200.1	51.6965	0.152011	7.86352	11.2295	NA	18.5356	10.6585	BL
2010-12-19	14.789	5440.11	824.979	4615.13	19.208	BL	6.25947	31.0331	BL	683.908	23.7221	139.552	19.6863	BL	BL	BL	BL	15.0406	BL	1.53299	13.5515	BL	BL	2.13896	BL	BL	BL	BL	4.25539	13.5724	728.887	97.4238	1.61944	10.3419	44.33	BL	1392.3	1351.52	35.0795	0.134185	10.7185	12.4171	NA	15.7776	9.73384	BL	0.128996	16.1485	0.130938
2010-12-21	72.0148	35634.6	2351.88	33282.7	55.1916	BL	9.2263	63.9275	9.45473	938.606	434.498	668.782	30.9653	BL	4.4615	2.15912	3.84703	112.899	10.2722	7.18366	32.3446	2.21969	0.931507	11.1008	2.82245	BL	BL	BL	11.1702	65.7437	2952.78	567.089	4.52856	44.8406	362.788	BL	8989.46	2592.43	155.685	0.0886201	48.364	44.1659	NA	60.5069	18.0269	BL
2010-12-23	8.99838	2914.72	853.457	2056.94	571.119	81.2611	28.8526	95.326	BL	254.815	733.242	67.3763	85.3039	BL	BL	BL	BL	49.9075	0.56	2.14707	4.58388	BL	BL	5.29072	BL	BL	BL	BL	BL	657.291	117.637	50.6888	48.6132	37.5248	742.743	BL	677.512	652.408	23.2391	0.26012	BL	3.53267	NA	4.77066	4.10215	BL
2010-12-25	9.58588	22103.1	3486.21	18614.7	744.712	110.702	62.3978	175.358	BL	238.293	1110.11	73.2603	80.2073	4.69575	BL	BL	1.46144	57.6239	0.737207	1.48133	6.11687	BL	BL	3.40127	BL	BL	BL	BL	BL	583.552	66.1285	37.1973	58.2361	46.4028	820.306	BL	380.862	423.1	11.3977	0.304382	2.2723	BL	NA	2.83134	2.50731	BL	DL	66.7565	1.02122
2010-12-27	13.61	8167.49	1719.47	6450.18	22.9019	BL	8.48269	47.1264	BL	229.882	32.8388	189.902	56.43	BL	BL	BL	BL	88.0967	1.13787	6.37651	12.5613	BL	BL	3.98193	BL	BL	BL	BL	5.24401	30.7566	257.451	135.037	26.5505	49.4319	49.0172	3.81234	721.685	488.853	32.4269	0.155808	12.4911	11.3256	NA	15.0105	5.99065	BL
2010-12-29	41.6092	2110.53	313.232	1801.62	43.7464	BL	11.2367	69.9531	BL	656.118	279.469	366.992	29.4666	BL	5.46473	2.02208	2.20149	133.162	6.68189	9.21205	23.8849	BL	BL	9.4536	BL	BL	BL	BL	8.5434	54.64	1225.27	362.701	18.8975	67.4361	327.029	2.17734	3540.75	1520.48	103.9	0.218547	27.0424	24.0674	NA	29.2843	15.4021	BL
2010-12-31	7.80626	3703.29	1108.39	2594.89	247.661	44.8642	17.4464	42.6313	BL	344.962	221.664	106.335	28.542	BL	3.08787	BL	1.42057	53.9856	1.23306	4.15856	5.91571	BL	BL	4.28243	BL	BL	BL	BL	BL	245.317	353.393	88.0766	19.6272	84.6676	208.223	BL	634.968	901.493	33.2456	0.221534	7.10568	6.91464	NA	8.69891	6.82058	BL	0.0289129	20.1359	1.96295
2011-01-02	8.16964	3655.75	654.665	3001.09	195.785	34.4148	BL	35.5396	BL	251.936	193.23	117.955	37.0972	BL	BL	BL	BL	18.3237	0.521562	1.00739	4.40022	BL	0.836702	BL	BL	BL	BL	BL	BL	181.3	311.417	78.9827	19.8263	57.1669	152.635	8.31039	781.196	488.31	25.786	0.327663	8.07391	9.61448	NA	14.5601	3.99532	BL
2011-01-04	11.5285	5637.56	905.033	4732.53	14.5897	BL	7.9847	35.5595	BL	171.462	32.607	153.587	30.6641	BL	BL	BL	BL	45.023	0.422725	3.60157	7.73882	BL	BL	1.4357	BL	BL	BL	BL	4.19414	20.1689	484.982	137.038	13.2693	57.8627	45.7592	6.67018	1324.96	458.841	45.3867	0.323775	17.1878	20.3188	NA	32.4402	4.34166	BL
2011-01-06	7.80711	4182.11	760.383	3421.73	21.8689	BL	6.62572	23.7908	BL	156.478	29.6523	104.904	12.6999	BL	BL	BL	BL	34.5771	0.648158	2.45173	4.22176	BL	BL	BL	2.10453	BL	BL	BL	1.78481	21.456	233.167	51.2277	4.41137	2.85125	41.6597	BL	523.923	244.46	12.4524	0.105817	8.18679	9.03799	NA	12.2845	2.79422	BL	0.0971996	14.066	0.303454
2011-01-08	16.1604	9774.25	3026.91	6745.18	43.5435	17.5908	37.1475	97.3129	BL	252.453	82.3746	216.279	55.3344	3.13405	BL	1.28703	2.53658	108.911	2.24856	7.27225	42.6086	BL	BL	5.20692	BL	BL	BL	BL	1.49568	45.6777	488.828	156.216	8.48453	60.8547	103.965	BL	1300.82	597.635	44.2399	0.232461	15.857	17.7956	NA	26.1397	5.28195	BL
2011-01-10	12.7989	5053.4	935.494	4117.9	152.952	26.1411	18.84	50.7187	BL	787.458	224.556	139.485	32.0617	BL	BL	BL	1.56531	37.2565	0.575651	2.32442	8.94464	BL	BL	4.92601	BL	BL	BL	BL	1.94066	139.044	760.696	98.841	13.1579	42.1251	171.167	BL	890.77	1832.26	30.8583	0.169714	11.435	18.5261	NA	24.0676	8.29839	BL
2011-01-12	27.7727	13845.6	2646.41	11203.5	58.4219	18.317	49.5341	151.341	BL	885.039	303.97	493.325	195.323	6.15666	BL	1.5547	4.86165	226.403	2.95163	13.0471	34.7187	1.37821	0.971485	6.14008	BL	BL	BL	BL	8.75697	48.6525	1036.37	325.436	14.712	158.103	249.136	BL	2449.64	1925.78	71.2497	0.172261	25.3209	40.416	NA	54.2747	10.0816	10.2522	0.277164	30.7275	1.25277
2011-01-14	23.1465	9638.55	2021.89	7616.66	28.2992	10.4663	23.1147	92.7562	BL	802.768	86.8452	257.876	121.149	5.48801	BL	BL	3.67599	115.993	1.12791	7.39531	21.2034	BL	BL	3.31778	1.41366	BL	BL	BL	5.21562	30.728	1378.07	213.044	7.68601	141.844	78.5122	2.97556	3972.38	2077.11	73.5545	0.1612	21.4134	36.5894	NA	52.8453	14.5486	10.6731
2011-01-16	20.423	6830.81	842.776	5988.03	41.2417	BL	16.0345	55.1431	BL	2038.66	27.1177	251.48	32.6949	BL	BL	BL	2.5385	61.6815	1.12567	3.5178	15.8662	BL	BL	4.65463	BL	BL	BL	BL	4.62	58.7894	1645.6	183.062	7.16147	72.8056	50.1779	7.70556	981.159	5145.86	74.3343	0.285236	22.4424	45.9308	NA	61.5426	19.7231	14.5574
2011-01-18	25.1452	11004.6	1952.91	8883.14	29.7458	14.6321	24.267	93.5484	BL	1337.22	83.0754	311.107	139.587	9.19029	BL	BL	3.50252	178.507	2.43013	11.3334	23.5157	BL	1.31003	5.07971	BL	BL	BL	BL	5.64773	29.2801	1520.62	261.353	6.7213	123.563	86.3241	29.168	2547.86	3598.33	93.9514	0.349556	25.2082	43.9202	NA	66.2071	13.6999	14.8959	0.126525	15.415	0.306713
2011-01-20	65.4711	34733.5	4346.28	30387.3	65.0804	37.2663	106.893	417.317	11.1797	602.043	679.915	669.229	627.546	11.8694	5.58674	3.53443	11.195	475.852	8.41667	29.3018	64.117	BL	BL	6.54797	BL	2.66891	BL	BL	29.2537	78.7811	2073.06	655.711	20.533	586.236	602.221	14.2246	9603.97	1695.14	133.217	1.1368	42.2914	46.6371	NA	86.8078	16.8975	11.0381
2011-01-22	19.427	8774.33	1421.35	7352.99	31.3595	11.734	21.0128	87.6913	BL	767.369	62.6739	277.056	112.215	4.85399	BL	1.85835	2.28454	102.885	0.748604	6.30134	20.8304	BL	BL	2.18955	BL	BL	BL	BL	6.84019	35.1581	1040.86	215.766	4.39121	115.395	62.5939	BL	2618.41	1812.29	60.9609	0.307154	18.917	26.5695	NA	37.7791	13.0801	9.65429
2011-01-24	47.5378	19891.3	2343.84	17547.5	39.2837	11.2686	32.1519	137.681	BL	1155.83	64.9903	450.921	197.337	BL	2.3556	BL	4.47105	233.176	2.60746	15.3029	28.8558	1.84533	BL	4.53097	BL	BL	BL	BL	2.98611	61.6904	2536.99	403.854	13.9604	183.209	47.3441	30.4814	6965.54	3153.15	181.17	0.357576	38.0846	34.672	NA	57.678	25.081	BL	0.332794	27.9069	1.67849
2011-01-26	11.7889	4939.08	600.377	4340.86	15.8258	BL	13.2605	40.9928	BL	1078.51	BL	179.071	37.2247	4.67341	BL	BL	BL	30.5337	0.851395	2.5306	15.7845	BL	BL	1.56832	BL	BL	BL	BL	5.30468	19.363	753.386	128.802	3.02765	26.3295	18.5109	1.73834	288.968	2215.88	48.7795	0.620679	12.2795	14.3689	NA	24.2255	10.6561	BL
2011-01-28	28.9013	14138.5	2646.65	11494	71.358	21.4151	52.9508	173.812	BL	970.874	37.8132	379.054	251.564	6.26285	2.42008	2.50995	4.81942	253.171	1.37806	14.9541	26.0533	BL	0.725925	4.74424	BL	BL	BL	BL	7.68758	78.8153	977.589	302.772	13.5814	208.682	29.8993	2.34105	2422.84	2324.33	114.913	0.384022	26.9366	24.5531	NA	41.3492	12.6715	BL
2011-01-30	12.2722	7030.25	470.988	6559.26	70.4109	9.45297	10.8473	45.0693	BL	387.626	16.4262	158.859	38.5885	BL	2.23839	BL	1.35825	70.2331	1.59408	4.23406	13.3889	BL	BL	3.02989	BL	BL	BL	BL	5.88831	71.1915	389.64	120.366	6.95066	47.9749	16.1339	13.5625	890.385	872.262	50.7806	0.170531	13.8215	12.7807	NA	20.9949	7.18162	BL	0.0971913	7.14714	0.447396
2011-02-01	17.9833	10637.7	2069.23	8570.66	49.4094	24.1908	56.0462	194.735	BL	340.262	23.591	223.583	345.416	7.64933	BL	3.44564	3.74675	226.387	1.47172	12.6084	21.5967	BL	BL	2.23311	BL	BL	BL	BL	5.65986	41.7202	320.285	152.568	11.4262	206.155	23.0936	4.52495	1467.05	674.812	37.0531	0.635351	16.7145	12.6804	NA	22.4739	5.0544	BL
2011-02-03	34.416	18557.1	2918.24	15638.9	45.7805	13.992	39.6172	136.585	BL	535.214	112.829	532.646	228.966	5.87469	BL	1.53781	3.51027	235.642	2.78415	15.4576	29.1169	BL	BL	5.6486	BL	2.20216	BL	BL	11.8776	60.0381	854.784	414.865	12.2454	262.413	78.3813	2.73337	3490.37	1273.08	92.0821	0.123603	32.0106	25.1633	NA	40.4994	8.08271	BL
2011-02-05	13.4892	6079.74	1207.74	4872	71.8782	12.1936	18.2764	64.3779	BL	449.536	37.6009	171.542	71.6144	4.60877	BL	1.4831	1.42337	62.0774	0.760258	4.35599	10.6308	BL	BL	5.78369	BL	BL	BL	BL	3.17943	65.1728	467.581	132.419	7.88458	84.6091	31.9339	37.0348	1025.75	1023.13	75.7809	0.297338	14.2022	13.6274	NA	23.939	6.71101	BL	0.163156	14.1265	0.707594
2011-02-07	11.033	3299.13	548.775	2750.36	51.0166	6.36295	13.1148	76.343	BL	877.411	12.1221	92.2761	69.5869	4.11592	BL	BL	1.31691	41.305	BL	2.63646	9.80327	BL	BL	2.97775	BL	BL	BL	BL	1.56258	46.7559	635.084	70.3141	6.63904	62.9247	18.446	39.3647	505.834	1862.11	39.8798	0.385319	8.97261	10.389	NA	20.4863	6.34733	BL
2011-02-09	21.0572	8388.59	1140.66	7150.72	46.1395	14.125	26.4089	116.84	BL	1526.23	38.2042	241.061	164.394	BL	BL	BL	3.10426	99.5454	BL	4.94826	15.5186	1.20178	BL	4.58386	BL	BL	BL	BL	2.83148	40.6333	1393.98	175.348	5.53642	137.915	47.7158	3.31496	1720.65	3715.1	72.1228	0.615315	18.0019	29.4263	NA	40.3583	10.4699	9.63336
2011-02-11	12.1628	5367.76	1034.67	4333.09	17.3786	BL	6.80692	33.0763	BL	967.675	27.5353	137.084	36.5993	BL	BL	BL	2.43899	34.0917	0.615639	2.18233	9.21171	BL	1.0868	2.29364	BL	BL	BL	BL	1.91228	13.9893	791.953	90.9309	1.64149	36.0401	36.6686	1.56018	740.68	1970.84	24.3938	0.126392	12.0517	16.7738	NA	20.1192	4.77486	BL	0.18908	6.86912	0.235607
2011-02-13	32.1357	11728.9	2015.67	9713.23	63.4314	22.6961	29.2305	114.756	BL	1768.93	263.145	304.483	177.135	3.96157	BL	BL	4.35304	169.925	1.99961	9.65099	36.7616	BL	BL	5.22506	BL	BL	BL	BL	15.3741	76.9596	2538.97	245.325	9.55935	174.121	201.342	6.56661	4835.17	4429.31	99.6977	0.117347	21.8837	32.9669	NA	50.6121	15.8411	9.265
2011-02-15	24.6001	8431.03	1697.87	6743.96	47.0999	18.421	52.9335	197.853	BL	2204.27	57.7679	254.011	348.81	5.74839	2.77536	BL	2.86094	194.154	1.013	10.1734	31.6906	4.2685	BL	2.29946	BL	BL	BL	BL	4.73622	49.9652	1704.14	205.304	8.87218	235.175	76.2419	6.18491	712.669	5986.3	87.3663	0.349411	17.6271	29.9012	NA	42.595	11.7447	9.15068
2011-02-17	9.89398	5131.84	1034.58	4097.27	23.8764	BL	24.2847	131.569	BL	432.75	21.5573	156.046	203.932	BL	BL	BL	1.84505	85.4262	0.94262	4.94485	10.3225	BL	BL	1.38721	BL	1.65005	BL	BL	3.67949	15.1897	411.395	98.526	3.07973	105.716	30.9891	BL	466.368	907.983	26.2984	0.245497	9.82776	15.1815	NA	18.416	5.36808	BL	0.209182	20.3598	0.490115
2011-02-19	6.71811	3033.61	680.617	2352.99	284.015	62.539	93.2288	239.26	BL	208.43	244.738	85.7309	100.213	7.17308	BL	BL	1.48326	88.9118	0.464444	2.88454	5.12538	BL	BL	6.13928	BL	BL	BL	BL	BL	129.249	72.5784	24.978	15.9596	21.4207	111.287	BL	227.678	229.174	7.42268	0.326771	2.57435	BL	NA	2.51507	1.60888	BL
2011-02-21	10.5307	4768.12	1011.09	3757.03	106.726	19.3234	13.6772	75.8844	BL	255.975	47.2101	110.901	120.867	BL	BL	BL	1.78093	84.7009	0.845573	5.17244	7.75522	1.00528	BL	7.64853	BL	BL	BL	BL	BL	95.2617	201.778	74.1838	18.8444	64.9265	47.7577	BL	519.431	512.496	13.5831	0.186727	9.08093	8.36634	NA	12.288	3.84066	BL
2011-02-23	11.076	5424.9	1471.27	3951.47	158.863	23.6775	31.9002	97.8113	BL	341.408	67.7356	114.748	156.918	4.29322	BL	BL	1.38529	95.9817	1.58802	4.97149	10.8841	BL	BL	16.6934	BL	BL	BL	BL	1.94364	133.37	237.985	73.0073	21.2622	96.1104	57.0324	29.3231	581.843	639.782	25.745	0.174308	7.59193	8.49295	NA	12.9508	4.88622	BL	0.0900129	25.0527	1.30765
2011-02-25	13.6476	7015.38	1972.6	5044.94	216.508	39.9326	46.3246	174.456	7.12385	392.377	75.7321	159.188	268.873	3.21813	BL	BL	2.70715	167.99	1.46235	7.73	14.1	0.956491	BL	5.49985	BL	BL	BL	BL	7.29141	215.01	213.701	116.106	31.189	195.185	65.0118	1.93554	677.799	903.307	53.6375	0.462926	12.3234	12.4231	NA	19.4595	7.72392	BL
2011-02-27	13.4033	6577.62	1199.27	5376.19	258.105	47.8855	36.8315	131.4	5.85986	269.232	71.5109	184.236	204.092	6.70608	BL	1.92241	1.81185	163.091	1.5771	8.18929	11.5985	BL	BL	5.26781	BL	BL	BL	6.01167	3.25334	209.58	110.734	113.056	26.6893	148.079	50.7142	BL	695.933	491.687	31.614	0.446056	11.8697	10.727	NA	18.3292	6.2396	BL
2011-03-01	9.46468	4360.03	1045.72	3312.16	257.092	33.5837	30.2185	87.3201	BL	401.189	65.8865	113.75	137.748	4.22363	2.85032	BL	2.29352	76.7912	1.39281	5.32508	7.98237	BL	BL	5.44448	BL	BL	BL	BL	BL	206.677	187.237	63.5359	23.7424	102.949	59.6197	BL	488.491	703.042	33.7231	0.421067	6.26866	5.54022	NA	10.9969	6.65906	BL	0.286668	19.2881	1.74458
2011-03-03	16.8461	9529.25	2069.6	7461.8	95.3369	16.6503	32.085	106.566	BL	319.287	43.0993	254.951	143.433	BL	4.01079	BL	2.40289	146.411	1.58559	8.97954	17.8642	2.01507	BL	5.14214	BL	BL	BL	BL	BL	81.7954	310.757	165.616	23.6707	161.37	52.9432	40.8328	1100.46	627.007	65.1381	0.448549	16.5699	15.0054	NA	31.9012	7.22715	BL
2011-03-05	9.6464	3615.68	794.845	2820.84	59.1432	11.8482	19.8036	60.2359	BL	716.998	9.44905	85.5508	66.5343	BL	BL	BL	1.20125	51.7444	0.468988	3.80027	10.2561	BL	BL	2.77213	BL	BL	4.38686	BL	3.08175	NA	NA	NA	NA	NA	NA	NA	NA	NA	NA	NA	NA	NA	NA	NA	NA	NA
2011-03-07	13.4638	5003.61	805.85	4202.08	64.3096	9.04975	24.0593	63.1514	BL	800.495	10.7855	156.074	70.4237	3.14726	BL	BL	1.57601	61.3058	0.879397	2.72097	9.37798	0.687062	BL	3.1845	BL	BL	BL	BL	1.84274	NA	NA	NA	NA	NA	NA	NA	NA	NA	NA	NA	NA	NA	NA	NA	NA	NA	0.0830543	14.8522	0.5866
2011-03-09	10.1525	3194.79	488.183	2708.77	46.5319	9.35847	18.256	71.5469	BL	1106.99	5.49594	102.561	51.2178	BL	BL	BL	BL	35.6052	0.601181	1.45428	10.2672	BL	BL	2.51377	BL	BL	BL	BL	3.46484	NA	NA	NA	NA	NA	NA	NA	NA	NA	NA	NA	NA	NA	NA	NA	NA	NA
2011-03-11	9.07622	4002.67	559.466	3443.2	BL	BL	7.93395	37.6744	BL	802.195	8.15632	116.155	67.2432	BL	BL	BL	1.324	39.7542	BL	2.15612	6.88739	BL	BL	BL	BL	BL	BL	BL	BL	NA	NA	NA	NA	NA	NA	NA	NA	NA	NA	NA	NA	NA	NA	NA	NA	NA
2011-03-13	28.2053	10638.5	1777.76	8860.74	35.875	20.6557	36.9381	132.663	BL	1494.31	50.7874	366.305	211.702	6.54131	BL	BL	3.2179	148.824	1.58649	9.0518	32.2126	3.85195	BL	5.56823	BL	3.34377	BL	BL	6.69578	67.5299	1704.67	287.332	23.1407	200.511	74.6997	4.7704	3351.94	4411.78	177.959	BL	3.88171	7.18509	NA	10.2968	7.09732	BL	0.278575	29.9649	1.11387
2011-03-15	29.3646	9381.32	1501.27	7880.05	30.0057	14.1049	41.8039	162.482	BL	1314.56	29.0672	266.108	209.295	4.13822	BL	BL	3.55382	145.045	1.79281	7.95606	19.5859	BL	BL	4.9088	BL	BL	BL	BL	6.24917	54.4297	2736.62	266.989	19.6648	284.651	54.257	10.4533	6281.35	5167.29	258.502	BL	2.35895	3.74729	NA	3.53736	4.75688	BL
2011-03-17	21.5989	9260.36	1868.49	7391.87	42.5395	20.2177	58.2174	233.128	BL	733.398	31.0307	270.681	320.249	7.49221	BL	1.48543	4.72997	196.145	2.11714	10.7016	25.402	2.70824	0.847996	5.27419	BL	BL	BL	BL	BL	NA	NA	NA	NA	NA	NA	NA	NA	NA	NA	NA	NA	NA	NA	NA	NA	NA
2011-03-19	19.1382	9379.16	1820.97	7558.2	59.0095	14.5321	45.5876	191.932	BL	1050.01	27.2061	296.902	249.495	8.80369	BL	2.34275	3.49614	172.033	1.51812	8.5473	15.2198	BL	0.881832	4.79929	BL	BL	BL	BL	9.91396	62.6883	877.482	208.616	14.1659	242.04	35.0151	BL	1201.94	2796.2	133.606	0.407025	11.3819	12.9335	NA	17.7078	16.2399	BL	0.283638	43.5837	2.15125
2011-03-21	22.2662	9374.84	1615.76	7759.09	123.399	41.7249	106.855	288.37	BL	1497.81	34.7704	380.317	122	8.9336	2.89002	BL	2.21482	157.294	1.94322	6.83257	11.3763	BL	BL	9.35226	BL	1.91734	BL	BL	6.96342	124.003	1118.43	243.623	19.2851	153.977	34.9567	BL	1150.89	3700.67	157.004	0.274994	11.1762	11.4627	NA	16.1903	18.5085	BL
2011-03-23	21.2524	10418.2	2075.86	8342.31	63.876	53.5149	177.793	481.262	BL	884.297	29.925	324.83	316.778	14.5027	3.65579	BL	3.80106	222.778	1.21582	8.46798	14.3154	BL	BL	6.99044	BL	BL	BL	BL	4.09192	54.5927	612.271	232	21.6571	232.078	38.042	1.57718	605.046	2523.6	119.546	0.619479	15.2405	14.114	NA	21.072	16.5238	BL
2011-03-25	21.4847	10599.6	2302.67	8299.11	65.4362	50.4793	191.173	526.12	7.70402	851.011	21.2228	369.535	301.477	14.0284	BL	BL	5.53274	269.931	1.76472	9.7893	18.8438	BL	BL	5.43988	BL	BL	BL	BL	7.13756	54.5802	581.587	250.189	21.6926	303.965	32.0424	1.06425	846.822	2287.3	140.78	1.11406	16.0321	16.6142	NA	34.1069	17.858	BL	0.356669	193.507	2.67863
																														308.926	338.828	72.1297	26.5644	122.26	117.232	72.5468	551.97	1446.4	53.2475	1.01893	4.5232	4.14308		11.2506	44.6211
																														277.879	376.797	121.39	34.5294	173.716	62.7991	23.5188	425.111	1716.78	52.6866	0.461297	7.17605	5.48247		11.1715	19.014
																														577.133	83.9095	52.8165	54.2079	173.456	747.268	77.2325	404.937	514.606	14.448	0.527962	3.97839	3.08169		10.5417	8.61999		DL	45.1891	0.836522
																														37.3009	45.001	20.3983	13.4123	42.566	58.9695	19.0219	402.885	714.449	38.4781	0.276482	6.42643	3.62423		7.80295	8.46467
																																			20.7096	13.1738	482.6	634.817	45.9292		8.63326	5.95622		9.7901	10.8682
																														10.9657	16.0423	8.12236	4.50055	10.7694	22.4641	19.3477	272.185	506.724	41.0682	0.356815	9.79576	7.47465		13.6191	7.27704		0.0554038	33.3247	1.0235
																														45.639	242.258	144.508	28.5406	331.112	18.4768	2.87344	231.666	1377.06	92.6678	0.283347	8.20934	6.3763		10.9759	18.1506
																														37.7775	587.592	140.554	17.8684	427.894	23.4986	15.3332	253.73	2649.66	89.7127	0.250377	7.23545	4.82168		11.2564	13.5074
																														29.1231	343.998	32.6895	5.29605	110.302	14.9347	38.9128	78.2096	1108.16	35.7507	0.182191	5.71004	3.45089		9.29697	12.4885		DL	24.6371	0.323169
																														25.0469	331.367	93.2368	11.0512	268.948	24.264	8.9802	333.423	1524.87	88.4679	2.0747	10.0611	6.80479		14.5079	12.6346
																																			26.3361	8.49885	183.738	1876.66	89.1538	4.48002	10.0212	9.72156		16.6655	14.6156
																																			22.7022	18.6027	216.455	1714.47	69.1062	1.24372	10.6912	6.96633		14.2207	11.1188		0.0637169	25.6607	0.757669
[truncated: 11 more columns]

## Sheet: RB
BL = below detection limit
NA = not available
UB	PM (ug/m3)	sunset (ng/m3)			PIXE (ng/m3)																									IC (ng/m3)																	ICP (ng/m3)
date	PM	TC	EC	OC	Na	Mg	Al	Si	P	S	Cl	K	Ca	Ti	V	Cr	Mn	Fe	Ni	Cu	Zn	As	Se	Br	Rb	Sr	Zr	Mo	Pb	Na+	NH4+	K+	Mg2+	Ca2+	Cl-	NO2-	NO3-	SO42-	Ossal.	F-	Acet.	Glicol.	Prop.	Form.	MSA	Piruv.	Cd_s	Al_s	V_s
2010-03-20	6.29389	2552.63	240.16	2312.47	91.7436	25.4956	29.6032	84.6156	BL	507.026	12.966	54.6842	81.313	BL	BL	BL	2.55322	45.7823	BL	1.31255	10.6348	BL	BL	3.10587	BL	BL	BL	BL	5.03648	87.5734	430.168	35.8818	8.16147	113.439	17.0364	71.3379	251.631	1366.61	41.936	0.887273	9.50172	12.5631	BL	20.2404	12.3479	BL	0.0928658	22.9209	0.584972
2010-03-22	9.98366	3358.65	470.955	2885.22	55.2007	21.3161	24.2378	84.4491	BL	804.493	15.4522	97.6651	78.2937	BL	BL	BL	1.60295	39.0729	1.26363	1.13975	14.0842	BL	BL	3.99467	BL	BL	BL	4.34132	4.42035	39.0181	594.621	44.3831	BL	69.4931	10.3635	BL	436.776	1616.88	48.7756	0.185963	9.27289	12.6494	BL	14.8697	9.26615	BL
2010-03-24	12.179	3279.69	240.461	3039.23	264.681	42.9624	28.0461	88.351	BL	923.105	58.0631	99.7523	59.407	BL	5.38519	BL	1.73048	41.8048	1.66936	1.26354	14.0069	BL	BL	8.20244	1.94149	BL	BL	BL	5.12816	302.942	773.495	72.7443	24.0041	84.0856	57.7653	BL	786.135	2476.02	113.35	0.350945	13.8991	14.6874	BL	23.2895	30.403	BL
2010-03-26	7.46562	2702.04	324.74	2377.3	293.04	47.2725	24.2455	62.1237	BL	459.861	71.5733	85.9424	38.0761	BL	3.44031	BL	BL	35.2151	1.70012	2.02302	9.67279	1.24864	BL	8.35111	1.61833	BL	BL	BL	0	228.627	208.666	36.0935	17.1644	32.9823	50.1321	BL	388.963	857.997	39.2669	0.250426	7.02542	7.38286	BL	9.13227	19.3896	BL	0.0898038	17.5303	1.84361
2010-03-28	10.0315	3006.89	314.819	2694.55	334.425	51.4143	22.9545	61.6311	BL	842.757	110.623	160.066	33.6509	BL	3.38096	BL	BL	20.644	0.891578	0.901344	8.46451	BL	BL	8.47413	BL	BL	BL	BL	4.04498	316.052	487.716	81.3423	24.2094	39.8843	86.4382	BL	510.655	1757.15	66.6207	0.664188	8.95837	7.9529	BL	10.791	39.6769	BL
2010-03-30	3.91438	2144.12	319.759	1824.36	54.4202	10.9912	BL	27.273	5.35023	287.577	BL	16.9465	14.2628	BL	BL	BL	BL	11.9919	2.01079	BL	5.49019	BL	BL	2.76254	BL	BL	BL	BL	0	21.6777	76.3794	5.34498	4.11748	11.1043	3.94768	BL	50.2598	289.463	11.1496	0.106525	3.49497	BL	BL	3.72778	4.28477	BL
2010-04-01	3.89074	2104.5	294.977	1812	29.5302	19.2533	84.5569	196.47	BL	185.894	10.4176	48.9662	31.578	BL	BL	BL	BL	68.4352	BL	1.26789	7.31151	BL	BL	BL	BL	4.20904	BL	BL	0	30.3099	88.7056	17.6696	8.7958	18.4679	15.3973	2.97874	67.4565	365.489	16.3829	0.32474	6.06192	5.30355	BL	5.56684	5.18588	BL	0.096932	47.3771	0.556847
2010-04-03	7.52048	3197.59	480.878	2716.71	31.1813	10.3341	14.5069	48.638	BL	677.659	BL	58.0422	22.1522	BL	4.43776	BL	BL	16.928	1.76165	1.4936	4.91119	BL	BL	BL	BL	BL	BL	BL	0	19.4635	326.825	26.1276	28.4865	7.0243	14.4323	BL	49.379	937.887	73.976	0.666916	6.14723	6.36703	BL	12.1918	10.8383	BL
2010-04-05	13.5277	4104.74	374.285	3730.46	100.856	17.0428	38.6618	103.687	BL	1788.39	BL	92.2502	46.7702	BL	17.8976	BL	BL	60.9693	7.07955	1.76407	15.3979	BL	BL	5.80877	BL	BL	BL	15.0478	4.29897	80.7752	1154.3	57.6941	9.71313	25.1115	10.478	BL	322.576	3497.53	138.997	0.165016	11.0725	9.58956	BL	23.0122	61.3523	BL	0.180516	24.9916	9.34818
2010-04-07	15.8762	3966.22	406.538	3559.68	39.4053	22.6797	58.896	138.208	BL	2510.18	BL	110.697	60.3335	BL	13.2882	BL	2.87146	63.8734	4.54673	2.25631	17.3219	1.77282	BL	3.03365	BL	BL	BL	BL	0	39.6442	1668.49	71.8358	BL	32.0128	9.35678	BL	128.775	4713.75	127.977	0.144055	10.704	13.265	BL	27.2375	64.8358	BL
2010-04-09	16.6754	7193.87	585.028	6611.32	41.987	24.0073	76.9683	188.211	BL	1166.24	55.3495	229.835	105.676	BL	BL	BL	BL	73.2683	1.35395	1.41808	11.2111	BL	BL	5.64655	BL	BL	BL	BL	8.79474	50.8683	842.833	135.406	6.19691	56.2808	9.4567	BL	107.04	2814.96	120.116	0.31485	15.6488	17.5341	BL	34.5042	26.8639	BL
2010-04-11	15.8212	4377.64	639.542	3738.1	57.4017	48.2811	150.026	380.594	BL	1678.39	BL	236.047	196.373	15.9232	BL	BL	5.62977	122.288	BL	5.91178	20.555	3.46351	BL	2.65916	BL	BL	BL	BL	0	64.0548	1310.88	176.886	12.4516	134.49	18.3995	23.5534	132.411	4095.94	169.836	0.659871	16.2449	21.5918	BL	46.6248	26.237	BL	0.176349	112.068	1.64022
2010-04-13	20.0687	7216.7	813.149	6403.55	44.9927	41.1008	128.82	377.493	BL	2139.16	21.4475	283.531	198.714	13.1665	3.40514	BL	4.49455	117.791	2.27275	1.93517	22.7097	BL	BL	5.74668	BL	BL	BL	BL	6.87818	48.4439	1628.2	195.064	15.8703	149.594	17.5872	BL	133.22	4853.34	185.648	0.974944	18.8954	25.8596	BL	46.3166	25.032	BL
2010-04-15	16.274	4439.53	505.675	3933.85	101.41	30.8905	60.3136	157.258	BL	2532.85	16.8848	123.413	107.275	BL	19.9699	BL	2.35845	66.823	6.72988	4.24263	23.82	BL	1.64857	5.37211	BL	BL	BL	BL	7.12031	89.9164	1524.86	77.4589	12.3356	56.6024	17.3074	BL	224.069	4344.5	150.279	0.167562	12.4632	14.6525	BL	29.92	66.144	BL
2010-04-17	6.77062	3150.84	168.574	2982.27	281.959	50.7159	9.50781	33.643	BL	541.827	12.1523	148.877	34.523	BL	BL	BL	BL	13.4066	1.19425	BL	4.17109	BL	BL	3.94614	BL	BL	BL	BL	0	226.184	271.452	85.4903	12.989	15.0721	64.6677	BL	306.873	1072.5	36.3577	0.0984434	7.73782	5.99487	BL	14.1939	28.9152	BL	0.102924	10.1809	2.43525
2010-04-19	5.06994	2513.46	275.142	2240.79	31.8867	9.15274	13.3334	44.3393	BL	399.303	BL	85.3006	39.3339	BL	BL	BL	BL	14.9313	BL	BL	4.4829	BL	BL	2.21382	BL	BL	BL	BL	0	21.0713	213.808	44.0902	7.96704	9.57742	9.15398	7.7177	48.9331	670.644	25.0278	0.113309	4.99425	3.66191	BL	11.0107	10.713	BL
2010-04-21	10.8315	2972.35	391.686	2578.18	41.3543	60.6029	202.261	485.562	BL	1354.16	9.35595	112.862	152.85	13.9597	BL	BL	2.11013	140.49	BL	1.66437	10.7279	BL	2.08433	3.99531	BL	BL	BL	BL	0	34.7784	1098.87	55.7075	13.5653	107.598	6.8211	53.9348	106.671	3296.45	79.633	0.493945	8.28496	9.87834	BL	18.8853	13.9178	BL
2010-04-23	11.7853	3673.58	518.069	3155.51	30.7666	17.8259	56.816	191.84	BL	1336.08	15.9654	107.069	120.533	BL	15.9943	BL	2.19139	77.9272	5.24205	2.194	16.0432	BL	BL	4.20389	BL	6.85879	BL	BL	8.14988	47.3634	1342.95	77.9794	10.278	103.908	12.5209	27.1811	104.501	4012.02	146.529	0.271463	14.8926	15.1052	BL	26.5615	26.4573	BL	0.201878	37.1485	7.25189
2010-04-25	11.4227	3817.28	570.113	3247.17	57.1973	18.2634	32.9092	102.798	BL	1344.2	BL	105.678	49.453	BL	BL	BL	BL	45.9406	1.34551	1.89353	8.04279	BL	BL	BL	BL	BL	BL	BL	0	56.5186	1150.28	65.8279	8.13372	49.6737	8.49877	32.0961	127.633	3249.65	92.58	0.0662708	12.106	15.9006	BL	28.495	47.6783	BL
2010-04-27	11.3864	3743.12	589.975	3153.15	140.846	59.1949	179.85	430.087	BL	1027.87	BL	199.76	136.153	10.2396	BL	BL	BL	86.0297	BL	2.88615	8.09312	BL	BL	BL	BL	BL	BL	BL	0	131.15	737.58	93.9622	15.1742	66.7236	12.3506	16.0256	170.813	2322.4	96.8254	0.408965	10.5718	10.0904	BL	19.4106	31.7375	BL
2010-04-29	4.88274	1115.48	96.6749	1018.8	605.338	89.4352	8.74625	27.2006	BL	224.15	855.769	37.1391	57.0717	BL	BL	BL	BL	9.71117	1.01626	BL	4.88906	BL	BL	BL	BL	BL	BL	BL	0	671.977	139.646	23.9937	32.1269	36.7692	960.051	BL	304.79	567.449	12.5483	0.339115	1.70945	2.29414	BL	3.79033	13.5601	BL	0.0731462	8.3596	1.44152
2010-05-01	9.74181	4389.87	508.144	3881.73	58.9992	25.1486	40.1514	135.443	BL	871.865	6.684	97.5002	119.6	BL	15.9305	BL	1.92538	70.1136	4.70271	1.40661	9.74265	BL	BL	3.87069	BL	BL	BL	BL	0	52.304	828.847	65.1027	25.059	91.9447	20.2259	7.15641	102.695	2322.41	113.058	0.640888	13.7564	17.655	BL	30.2241	27.1933	BL
2010-05-03	11.61	3931.45	324.729	3609.2	37.3783	31.8526	95.8622	332.106	BL	1098.79	13.7427	104.91	128.024	10.2977	25.8702	BL	2.92074	86.2789	7.4394	1.61037	10.4254	1.51394	BL	3.7178	BL	BL	BL	BL	0	35.4824	975.967	61.2331	14.896	96.8575	13.7979	104.413	118.95	2709.06	116.306	0.805487	15.0004	19.8749	BL	35.838	15.9406	6.78841
2010-05-05	7.19377	3085.94	456.074	2627.38	25.0665	15.7126	42.9208	123.027	6.55246	605.25	11.7678	57.2555	89.998	6.57979	BL	BL	BL	49.7642	2.1856	3.22847	7.6716	BL	BL	1.8833	BL	BL	BL	BL	0	19.9837	626.529	40.0275	BL	58.4866	10.5844	14.3572	68.5139	1592.38	64.6615	0.297042	10.6586	13.7674	BL	22.0388	13.6577	BL	0.100604	21.573	2.08601
2010-05-07	10.6487	2446.75	349.536	2099.69	26.9002	17.7469	19.0862	69.2201	BL	1406.6	11.3837	53.3427	33.2194	BL	18.4218	BL	BL	27.4501	5.71537	0	5.84883	BL	BL	2.40718	BL	BL	BL	BL	4.54359	23.2754	858.084	26.8817	7.30817	38.415	10.7465	BL	27.8588	2656.12	76.6998	0.159776	8.64523	8.89061	BL	12.3409	28.0698	BL
2010-05-09	9.46953	2372.3	359.439	2010.38	54.0737	16.4148	36.0984	98.1378	BL	1135.8	7.00117	77.0068	62.2823	BL	7.93192	BL	1.89416	56.6394	1.99056	1.1105	9.57858	2.08677	1.59032	3.35598	BL	BL	BL	BL	0	34.6173	505.515	24.3385	6.68202	28.283	8.69566	BL	37.7307	1568.19	41.8747	0.302996	6.34847	5.86946	BL	7.93663	36.12	BL
2010-05-11	9.26262	2322.72	381.749	1940.97	53.4558	28.9507	53.9556	155.625	BL	967.806	BL	82.7632	161.088	8.23315	BL	BL	3.89576	95.2215	2.14456	1.08033	8.00244	BL	BL	BL	BL	BL	BL	BL	0	30.3884	383.207	21.4362	6.78019	48.1171	6.82333	BL	39.417	1245.86	32.8022	0.382157	5.46945	4.2114	BL	6.78692	15.9823	BL	0.150512	33.4216	1.18772
2010-05-13	11.1016	2322.8	339.62	1983.18	59.0411	37.8789	75.9794	219.75	BL	1404.45	BL	114.307	164.65	7.11091	BL	BL	3.41871	85.7056	1.45828	1.86612	10.5483	BL	1.63514	BL	BL	BL	BL	BL	0	38.3766	665.923	35.7592	11.3202	78.7045	7.14456	BL	49.3577	2215.53	46.3204	0.521635	6.21016	5.86672	BL	8.33171	26.363	BL
2010-05-15	12.4024	3160.35	458.561	2701.79	45.5777	41.8499	152.287	386.984	BL	1533.28	9.10612	137.443	153.937	13.2254	BL	BL	2.25211	117.447	BL	2.20652	10.1284	BL	1.46493	3.55606	BL	BL	BL	11.5259	0	40.4346	1080.49	77.7083	16.162	119.457	11.4609	36.2855	75.237	3695.26	82.9876	0.864366	10.1521	11.6308	BL	22.0976	31.1845	BL
2010-05-17	19.7424	4268.65	582.539	3686.11	101.045	115.239	332.357	813.259	BL	2331.58	17.4252	186.566	412.561	30.6849	12.0803	BL	3.99678	235.219	5.39386	1.68571	12.382	BL	BL	4.94847	BL	BL	BL	BL	0	99.2645	1389.19	69.0178	31.3631	251.602	18.2274	86.8626	166.738	5024.65	144.346	0.597602	13.0671	13.8314	BL	27.4353	47.5999	BL	0.137403	236.177	7.68405
2010-05-19	9.39692	2868.18	287.562	2580.62	68.8937	30.9752	53.4611	185.128	BL	1059.01	9.62428	63.8807	196.122	BL	12.8766	BL	3.27063	63.6496	5.04475	1.70714	8.52355	BL	BL	2.63924	BL	BL	BL	BL	3.607	41.9739	562.366	21.262	10.9676	88.2777	7.66008	51.3037	89.5422	1775.29	47.1568	0.351541	7.63198	6.66419	BL	10.6359	75.0432	BL
2010-05-21	22.1827	5492.92	798.159	4694.76	53.5134	44.811	94.034	290.713	BL	2995.61	17.4704	116.241	189.112	7.53005	23.5932	BL	3.19393	119.731	8.11751	5.56614	16.2323	2.26254	BL	3.33091	BL	BL	BL	BL	0	59.0467	2141.39	62.8008	21.2356	197.408	18.9549	433.036	239.44	6791.14	215.864	0.740364	29.2262	28.6962	BL	67.5877	108.352	BL
2010-05-23	13.1963	2919.87	527.955	2391.91	89.8909	52.4711	138.535	352.256	BL	1676.48	6.69547	137.27	141.16	14.8534	4.30418	BL	2.81151	129.549	2.72802	2.17731	14.5155	BL	BL	3.29227	BL	BL	BL	BL	3.9162	65.7748	931.977	54.3303	11.8999	67.0294	7.12945	BL	65.2977	2761.36	90.0461	0.228534	5.04283	6.21586	BL	9.85796	66.1742	BL	0.0975858	85.7845	3.68136
2010-05-25	17.861	3395.58	448.868	2946.71	74.9824	85.8774	275.746	681.961	BL	2202.91	BL	176.122	293.104	18.971	9.95991	BL	7.19171	237.931	2.55926	2.8233	15.6803	BL	BL	3.88056	BL	BL	BL	BL	4.4192	70.5739	1553.46	71.8699	34.5014	185.917	13.9572	BL	98.3366	5152.2	121.216	0.60061	7.80789	7.75307	BL	13.8472	61.2719	BL
2010-05-27	10.4619	2516.5	297.7	2218.8	179.804	47.423	58.2152	158.524	BL	1427.2	6.11024	52.8666	77.5643	7.05255	11.1925	BL	2.36361	50.5176	3.00823	0	8.66491	BL	BL	2.01891	BL	BL	BL	BL	3.06201	36.2742	212.498	6.16292	2.9004	20.7957	3.30039	BL	36.2803	611.781	11.2889	0.143114	BL	BL	BL	2.61251	14.4704	BL
2010-05-29	8.64041	2907.12	318.621	2588.5	32.9889	31.8607	65.1973	211.693	6.3992	689.056	BL	82.3317	223.053	5.86556	5.80661	BL	2.03434	70.3833	1.77	1.87098	7.89829	BL	BL	BL	BL	BL	BL	BL	0	27.7334	493.277	35.5949	12.7623	112.184	6.50688	BL	73.0111	1398.78	56.7897	0.461355	6.23146	6.96943	BL	10.003	32.1382	BL	0.0960514	42.4914	2.27726
2010-05-31	6.09262	2932.76	272.112	2590.88	38.096	10.2669	16.5781	52.8904	BL	580.638	5.66525	53.0328	20.1508	6.52458	BL	BL	BL	21.9357	1.25817	1.08277	8.91564	BL	BL	BL	BL	BL	BL	BL	4.90882	18.089	294.41	18.6806	BL	41.237	4.65036	BL	33.6975	700.878	30.9704	0.117583	4.32046	5.13299	BL	5.92542	25.8599	BL
2010-06-02	7.28478	2467.39	197.67	2267.39	24.107	8.65811	10.2755	40.787	BL	766.59	BL	36.8575	27.1625	BL	BL	BL	1.62123	20.8766	1.25178	0	7.65208	BL	BL	BL	BL	BL	BL	BL	3.88312	6.75137	253.372	12.4083	BL	21.0903	4.32759	BL	37.1502	582.551	18.5005	0.20311	3.22355	4.1676	BL	5.94927	9.29879	BL
2010-06-04	13.9643	3186.09	265.12	2920.97	180.416	38.9248	27.8002	104.437	BL	1639.73	16.8072	59.0939	54.7292	BL	7.27405	BL	1.61489	61.0958	2.80731	1.94644	15.2132	BL	BL	3.8427	BL	BL	BL	BL	0	153.885	1086.23	33.6296	16.499	64.5386	17.1206	4.53198	127.618	3126.42	97.4243	0.181589	11.0103	13.588	BL	20.7596	101.39	BL	0.158433	21.9115	3.21315
2010-06-06	12.8996	1630.29	186.053	1444.23	377.407	65.6016	33.7017	75.9895	BL	1536.2	87.3902	81.5357	56.8763	BL	10.6853	BL	BL	33.4587	3.60055	0	10.2897	BL	1.61517	5.06979	BL	BL	BL	BL	0	480.157	886.489	53.7679	34.3065	34.0396	79.16	214.093	501.262	3098.61	77.7304	0.223171	6.12647	4.76777	BL	11.9227	93.3413	BL
2010-06-08	7.15167	1474.36	225.572	1248.79	110.258	18.1156	9.36121	42.4927	BL	630.186	BL	26.0819	22.2448	BL	BL	BL	BL	14.124	2.73673	1.07037	3.20684	BL	BL	BL	BL	BL	BL	BL	0	220.071	770.831	45.1417	26.1233	25.2205	19.7689	4.19696	264.193	2409.39	75.9467	0.158569	5.1802	3.25113	BL	3.64542	86.8049	BL
2010-06-10	9.99964	1688.55	230.257	1458.29	202.513	38.1357	8.72715	40.2493	BL	1214.34	BL	59.9467	35.8467	BL	4.57159	BL	BL	14.0279	2.41563	0	3.11302	BL	BL	BL	BL	BL	BL	16.6366	0	302.316	1179.77	64.0233	40.2945	53.1076	14.9192	100.587	294.581	3775.68	108.68	0.442018	7.53257	6.40805	BL	14.7675	172.543	BL	0.1502	10.8682	4.98281
2010-06-12	10.4492	2006.97	225.581	1781.39	225.741	43.6242	12.0309	49.6527	BL	1186.97	BL	45.4196	41.9421	BL	3.53177	BL	BL	14.826	2.50634	1.44428	4.24693	BL	BL	BL	BL	BL	BL	BL	8.86047	107.139	335.524	22.6871	15.1149	12.9152	2.36547	BL	96.711	1044.67	36.9024	0.120214	3.39767	2.026	BL	2.95065	34.3311	BL
2010-06-14	15.1015	NA	NA	NA	159.984	18.0078	17.6122	59.5321	BL	2129.8	8.70902	51.1675	47.545	BL	11.8457	BL	BL	28.3216	5.43859	0	6.38632	1.81155	BL	2.72862	BL	BL	BL	BL	0	162.299	1611.49	51.2318	21.7845	38.4476	9.02818	BL	55.7608	5073.06	110.211	0.241826	8.22721	7.08938	BL	10.0403	87.2447	BL
2010-06-16	12.2341	1739.43	144.178	1597.58	179.074	29.0803	16.4162	61.3404	BL	1907.17	7.62364	98.4984	30.7416	BL	5.13072	BL	2.43101	36.9261	3.01404	1.56826	8.55765	BL	BL	BL	BL	BL	BL	BL	4.01608	137.261	1084.74	58.794	7.7297	20.3207	6.89079	BL	57.6888	3339.48	60.6922	0.219582	3.49348	2.66791	BL	4.36856	99.1525	BL	0.131979	14.6671	4.49182
2010-06-18	9.97011	3062.61	251.148	2813.79	65.5018	21.7251	57.1766	129.616	BL	1113.33	BL	60.549	50.8286	BL	8.44333	BL	BL	47.592	3.85575	1.25788	6.74609	BL	BL	4.40881	BL	BL	BL	BL	0	47.0418	753.333	44.3625	8.72136	30.3638	5.19015	BL	37.8365	2095.39	76.3606	0.275692	7.58064	7.16612	BL	8.10428	53.3258	BL
2010-06-20	7.75602	2504.64	148.837	2358.13	168.292	24.8289	36.6612	107.898	BL	982.205	9.24868	53.7523	45.9065	6.38186	3.12853	BL	BL	28.8887	1.23733	0.89207	5.27889	BL	BL	BL	BL	BL	BL	46.5739	1.87552	123.949	606.593	34.8387	40.9795	38.3273	3.04484	BL	82.9465	1876.3	65.168	0.194949	5.39281	4.13425	BL	4.93518	51.4836	BL
2010-06-22	6.21362	2197.75	165.122	2032.62	58.1178	11.3467	15.9688	50.055	BL	604.648	BL	31.2714	34.7356	BL	BL	BL	BL	16.0233	BL	1.32409	6.79647	BL	BL	BL	3.01252	BL	BL	BL	3.37126	19.6057	140.828	10.361	12.7927	11.2378	1.99753	BL	26.4448	379.417	23.7435	0.183612	2.48258	1.93193	BL	1.88492	15.7367	BL	0.246893	14.31	0.754121
2010-06-24	4.73753	1925.57	127.906	1797.67	61.0043	13.4291	11.0692	43.9587	BL	474.053	BL	30.2508	23.5907	BL	2.98571	BL	BL	20.8139	1.88106	0.677751	5.79623	BL	BL	BL	BL	BL	BL	BL	BL	11.5785	35.4075	4.78081	BL	7.27535	4.08911	1.06707	23.8586	134.507	5.73869	0.105195	BL	BL	BL	1.11815	4.53024	BL
2010-06-26	9.58432	1802.38	167.447	1634.94	128.42	21.7385	10.4791	43.3486	BL	1237.79	BL	45.0988	24.4825	BL	BL	BL	BL	15.916	2.43927	0.731058	5.58455	BL	BL	BL	2.87253	BL	BL	BL	BL	94.446	624.986	23.202	13.7577	24.0105	5.1047	18.4807	55.1801	1812.8	55.3953	0.104845	4.11599	3.58675	BL	4.82111	81.5964	BL
2010-06-28	14.9568	2709.29	334.882	2376.73	116.767	39.7304	27.5799	54.438	BL	2065.03	7.90638	147.489	29.16	BL	7.34629	BL	BL	26.9649	4.56073	2.29178	8.38794	BL	BL	BL	BL	BL	BL	BL	3.13921	120.688	1446.02	102.577	30.4559	35.554	4.98443	BL	31.5652	4526.04	124.54	0.0602101	6.77017	8.11201	BL	10.8	111.693	BL	0.132907	29.0841	6.32324
2010-06-30	18.8352	2999.93	548.825	2451.11	71.9009	15.6357	26.4034	76.9355	BL	2953.88	BL	44.2851	34.9813	BL	18.9115	BL	BL	34.8372	9.52872	1.89579	10.9353	BL	BL	BL	BL	BL	BL	BL	2.33932	54.0763	1480.77	34.7316	12.8643	22.8286	8.61927	BL	16.6094	4581.19	87.8812	0.114915	4.3426	5.29846	BL	8.58101	73.2104	BL
2010-07-02	19.0519	3074.52	511.644	2560.55	45.5972	14.4295	21.3026	68.2032	BL	2647.49	BL	57.3423	47.0776	BL	16.5852	BL	BL	29.9915	7.76046	1.68509	8.11372	BL	2.14497	BL	BL	BL	BL	BL	BL	43.9915	1787.66	47.4709	9.54173	31.8923	12.9932	BL	24.8148	5500	119.865	0.0683705	6.7043	7.79747	BL	11.8244	58.8332	BL
2010-07-04	17.0487	2862.68	353.474	2509.2	52.772	10.1999	19.5581	70.8428	BL	1464.45	6.40205	27.947	27.2396	BL	6.1693	BL	BL	21.2831	2.83059	1.50167	5.37773	BL	BL	BL	BL	BL	BL	BL	2.55804	70.5072	1678.08	48.9918	16.3877	55.7646	13.8044	9.71872	42.6025	4550.35	115.666	0.147278	5.93405	7.99667	BL	12.8282	62.6523	BL	0.14986	10.7764	8.81431
2010-07-06	16.5647	2492.88	288.355	2204.52	113.181	23.2448	19.0053	66.5662	BL	2253.1	BL	44.6305	31.7237	BL	10.4311	BL	1.05781	35.2727	4.98398	1.28616	9.44776	BL	BL	1.40823	BL	BL	BL	39.8455	3.21905	100.685	1684.52	43.3387	16.744	36.2539	13.4711	28.048	53.5754	4553.65	141.637	0.394114	9.02824	10.9934	BL	20.6267	66.2091	BL
2010-07-08	6.36465	1455.76	130.227	1327.85	319.27	43.1909	9.99131	57.9289	BL	385.381	89.6377	26.284	48.6013	BL	BL	BL	BL	17.0827	1.30156	0.756498	2.98974	BL	BL	BL	1.69978	BL	BL	BL	BL	294.053	235.24	16.7229	21.0297	14.6505	130.678	BL	252.839	914.564	39.8483	0.195523	3.35506	BL	BL	3.72784	51.5718	BL
2010-07-10	7.65372	1618.66	209.309	1409.35	296.906	49.3697	18.1526	60.6674	BL	748.939	8.09819	30.7395	48.8309	BL	3.81097	BL	BL	27.0742	2.09643	0.929922	4.95129	BL	BL	BL	1.42909	BL	BL	BL	BL	235.72	360.026	22.6397	33.6374	26.8224	19.3164	BL	206.152	1196.24	53.7353	0.131107	4.81289	3.01115	BL	4.68513	83.041	BL	0.101929	8.85273	2.66394
2010-07-12	11.1934	1899.82	246.488	1653.33	168.694	32.4082	16.7858	59.1544	BL	1491.92	BL	37.7542	46.9523	BL	10.2769	BL	BL	25.2565	5.13132	1.39017	4.27057	BL	BL	BL	BL	BL	BL	BL	BL	142.297	910.12	27.3112	36.7141	39.5433	10.0815	63.4176	79.5197	2413.93	88.3181	0.222846	5.25051	4.71161	BL	8.84652	111.869	BL
2010-07-14	8.56144	1753.55	165.122	1590.75	110.431	22.3075	26.6396	104.405	BL	931.413	5.31223	49.5834	95.7424	3.68508	BL	BL	2.15353	56.2972	1.91513	1.28697	8.92061	BL	0.760986	2.03278	BL	2.06689	BL	BL	2.40319	96.5745	675.499	30.6919	21.9297	41.3626	11.7833	8.22853	91.0719	1789.68	55.354	0.51494	4.72982	4.653	BL	6.94464	67.3729	BL
2010-07-16	17.7531	3081.27	486.027	2592.92	115.267	30.7776	59.0944	168.872	BL	2193.53	6.10675	114.593	152.911	5.82472	17.0129	BL	1.48019	69.2905	7.63497	2.65945	8.69849	BL	BL	2.52464	BL	BL	BL	BL	3.34907	103.861	1558.43	73.3073	33.5116	114.782	11.1702	37.2187	69.2032	4348.23	114.346	0.392607	7.16022	9.20422	BL	16.1053	114.111	BL	0.061587	27.5995	12.6296
2010-07-18	6.8678	1560.37	20.929	1537.12	405.431	69.9926	15.9651	53.8811	BL	257.836	608.811	40.6717	74.727	BL	3.46895	BL	BL	18.4448	1.23334	0.793864	1.28737	BL	BL	3.93103	BL	BL	BL	BL	BL	507.744	125.039	20.9357	18.6382	98.96	612.899	53.7393	327.031	673.115	36.0697	0.264212	3.53102	2.64543	BL	3.56784	35.1108	BL
2010-07-20	8.80919	1376.69	153.482	1223.21	165.395	26.4671	11.6241	39.856	BL	1027.94	BL	28.0853	37.6892	BL	7.13678	BL	BL	16.8919	4.61612	0.770054	2.02797	BL	BL	2.01446	BL	BL	BL	BL	BL	90.3505	228.769	14.074	11.719	37.0515	33.416	3.53686	105.04	787.522	25.9967	0.195387	3.7139	3.5702	BL	BL	28.6396	BL
2010-07-22	10.2253	1860.42	274.413	1583.69	118.089	24.6268	41.8031	123.662	BL	1154.72	BL	54.5914	75.2855	4.46556	5.54068	BL	2.67702	67.9957	3.51622	1.50796	7.95381	1.21435	BL	3.09968	BL	BL	BL	BL	BL	104.847	630.783	29.2524	12.812	71.6713	22.5381	11.3518	95.6151	2036.87	71.7541	0.314132	4.28075	3.35927	BL	4.12445	47.7236	BL	0.0706757	22.7862	5.28555
2010-07-24	13.4018	2541.94	388.385	2153.56	244.49	51.7377	65.6707	164.728	BL	1367.88	10.0416	237.193	61.4668	4.64957	8.00264	BL	BL	44.3455	3.64456	0.857228	12.1057	BL	BL	4.46981	BL	BL	BL	BL	4.70008	265.35	879.51	139.489	16.9229	72.5503	8.98528	18.1384	172.42	3219.79	159.052	0.183502	6.98947	5.39298	BL	8.32772	104.882	BL
2010-07-26	15.011	3335.11	423.285	2911.83	103.597	24.09	43.0433	112.841	BL	1577.63	BL	70.3311	98.3743	5.73099	12.4501	1.89837	1.75257	42.8892	5.79416	0.646037	5.31468	BL	BL	3.18717	BL	BL	BL	BL	3.59245	108.314	926.14	56.8849	12.9691	54.4976	22.9623	7.95914	79.9715	3025.12	93.9222	0.237273	6.2864	5.79884	BL	6.79115	46.5609	BL
2010-07-28	13.8723	2390.95	358.177	2032.77	93.2201	24.9698	38.8037	118.588	BL	1702.84	6.72023	55.024	70.296	4.16261	13.6544	BL	1.65022	42.0041	7.18777	0.956706	6.88808	BL	BL	2.84019	BL	BL	BL	BL	2.68157	91.5452	1217.06	44.1896	12.2261	56.1836	19.4207	8.85878	55.7662	3923.19	102.288	0.261429	5.8426	4.66554	BL	7.37389	61.1837	BL	0.0908464	20.3307	11.6483
2010-07-30	16.8742	2390.86	425.611	1962.93	94.2786	18.0574	39.0592	107.84	BL	2154.74	24.1994	65.3117	65.5505	4.56062	17.9103	BL	2.69095	42.7572	8.09964	0.845203	6.22749	BL	BL	2.27298	BL	BL	BL	BL	1.93322	112.675	1674.67	51.0439	10.2414	61.9276	60.1445	2.31859	45.3193	5311.98	116.233	BL	4.31505	5.50336	BL	6.57913	80.3717	BL
2010-08-01	11.7626	1906.97	406.975	1499.99	125.955	28.2345	22.0242	61.2073	BL	1432.92	5.9178	46.0027	31.0884	6.77516	10.4145	BL	BL	28.2696	3.60022	1.39399	3.63963	BL	BL	3.99971	BL	BL	BL	BL	BL	143.948	1126.35	33.4075	9.97945	39.6964	9.61204	17.5723	78.9417	3633.62	122.026	0.301786	6.61434	6.73581	BL	10.398	75.2238	BL
2010-08-03	9.49892	1432.73	181.418	1251.32	193.781	35.9103	21.77	62.7099	BL	1120.83	BL	42.6645	42.1823	BL	8.77273	BL	1.31038	26.9991	2.67889	0.921692	4.38346	0.702888	BL	2.24107	1.59695	BL	BL	BL	BL	226.62	757.979	28.0794	15.9841	34.0214	7.03251	62.2874	173.823	2625.93	80.5069	0.20927	6.48419	5.05533	BL	8.66269	63.42	BL	0.0437856	14.507	5.44132
2010-08-05	8.45345	2230.39	390.724	1839.66	59.641	10.634	9.51613	38.8255	BL	902.884	5.3141	31.9297	25.8263	BL	12.1899	BL	BL	18.9769	5.88871	1.29382	4.0675	BL	BL	3.35689	BL	BL	BL	BL	1.40686	49.1826	442.326	19.0836	8.4124	14.3443	9.25633	8.50547	45.9825	1284.96	52.9622	0.165756	4.96563	4.57191	BL	4.53625	28.1515	BL
2010-08-07	9.58379	2604.69	376.75	2230.26	46.4905	12.4681	22.1254	73.3577	BL	1271.4	5.89215	42.9543	57.0989	BL	11.1701	BL	1.2288	31.5269	4.39348	2.0719	5.57633	BL	BL	2.42823	BL	BL	BL	BL	1.34967	59.5279	1093.93	54.2842	16.0052	50.4819	14.0849	89.5561	110.668	3316.25	129.36	0.343698	6.85555	3.25072	BL	11.9738	49.828	BL
2010-08-09	12.8694	3111.62	397.673	2713.94	37.0727	BL	22.1795	81.2698	BL	1576.3	7.83724	68.413	32.0479	4.54337	4.88768	BL	BL	32.8225	3.18935	2.97153	6.52029	BL	BL	1.70962	BL	BL	BL	BL	3.48104	38.7412	1065.05	50.3304	BL	28.6548	12.1075	9.22642	66.4631	3021.35	106.177	0.264449	5.74064	6.36616	BL	8.57358	26.5441	BL	0.131139	20.1113	7.01558
2010-08-11	12.3717	2341.68	304.628	2037.05	67.9309	11.6249	8.999	51.157	BL	1710.93	BL	38.4191	27.705	BL	11.5474	BL	BL	21.4703	5.50134	BL	4.58781	BL	BL	2.17097	BL	BL	BL	BL	1.56637	60.8161	1131.94	36.7075	BL	17.9197	4.85083	11.7213	44.0707	3326.53	90.0862	0.238501	3.61304	3.72134	BL	6.05819	36.008	BL
2010-08-13	15.3077	2439.7	341.884	2097.82	43.995	18.0751	18.7675	60.1328	BL	2286.5	BL	65.2113	29.0644	BL	14.7105	BL	BL	27.2875	8.74524	1.54819	4.42967	BL	BL	3.00519	BL	BL	BL	BL	2.23002	53.906	1611.62	51.2088	BL	23.7527	5.78228	5.77224	47.336	4829.19	103.277	0.164054	3.7037	3.95762	BL	8.4165	49.5482	BL
2010-08-15	14.5559	2995.55	402.353	2590.88	56.131	13.1497	27.3844	92.7655	BL	2012.79	BL	273.231	59.0879	3.72171	11.8935	BL	1.27094	37.6755	7.20035	0.784134	6.70179	BL	BL	3.19379	BL	BL	BL	4.27743	1.87732	65.2613	1727.72	188.035	BL	35.0877	11.3094	10.7504	54.765	5420.1	119.473	0.227303	5.89819	5.96193	BL	10.8169	56.418	BL	0.0685592	16.2385	11.4165
2010-08-17	15.756	2746.1	437.144	2308.96	48.7332	16.2231	43.3253	121.72	BL	2189.91	16.3554	86.0716	55.8933	4.81775	12.508	BL	BL	49.7335	7.62549	1.59521	7.45304	BL	BL	3.44704	BL	BL	BL	BL	1.83576	43.3127	1634.05	69.8808	BL	33.2893	12.4269	BL	45.8	4709.42	108.886	0.258009	5.34646	3.37757	BL	7.15117	39.3717	BL
2010-08-19	14.6945	3176.44	546.46	2627.66	39.769	36.2154	143.402	347.303	BL	1552.96	11.3584	85.0534	97.4152	10.473	9.88399	1.85002	2.52945	113.168	4.45227	3.01829	5.98139	BL	BL	3.07349	BL	BL	BL	BL	BL	39.1546	1167.45	43.9572	BL	47.5099	9.12273	BL	43.4457	3291.39	133.663	0.172817	7.4867	6.31246	BL	8.41385	29.5594	BL
2010-08-21	18.2664	4046.64	732.582	3314.06	35.9353	32.0336	116.317	289.678	BL	2410.65	7.80578	95.896	103.948	5.60347	17.206	BL	1.96783	92.3633	7.89447	1.79287	6.82775	BL	0.939302	1.85527	BL	BL	BL	BL	BL	23.0822	1348.48	40.2464	BL	47.8086	8.14863	BL	29.5607	3695.05	125.085	0.173089	6.30215	5.94442	BL	7.47022	32.3226	BL	0.0560175	60.7991	13.141
2010-08-23	22.1621	5225.37	581.372	4646.32	66.2326	25.1743	66.5414	175.792	BL	2367.36	20.0259	132.066	89.8499	BL	10.3258	BL	2.01207	62.5853	4.50724	2.10969	7.01364	0.856676	BL	5.78294	BL	BL	BL	BL	BL	70.31	1810.63	70.6929	BL	69.0383	3.50935	BL	33.5659	5283.43	147.363	0.253895	12.1834	13.7396	BL	17.5133	45.9242	BL
2010-08-25	14.1763	2662.78	376.743	2286.04	65.1941	18.5639	50.1864	144.191	BL	1785.42	7.8938	91.1053	60.9882	BL	4.90101	BL	BL	47.5695	1.79327	1.57702	6.72075	BL	BL	2.97985	BL	BL	BL	BL	2.79965	62.6494	1395.87	55.4581	13.0425	44.3467	8.18808	47.7041	132.045	4075.05	114.336	0.303967	5.99305	7.3202	BL	13.3467	48.9053	BL
2010-08-27	17.9636	2771.82	457.003	2317.3	66.1812	19.45	60.6897	153.813	BL	2873.57	11.5341	185.308	60.5276	9.84485	6.99135	BL	BL	51.9623	2.93681	1.04859	8.26615	BL	1.94315	1.29192	BL	BL	BL	BL	1.86528	73.9028	2286.77	113.255	BL	49.458	8.8871	89.492	57.0802	6922.87	115.134	0.229161	3.96567	5.93526	BL	14.126	79.4296	BL	0.0887106	35.2472	6.614
2010-08-29	18.132	2530.41	502.36	2028.05	85.8567	30.8145	93.1182	226.937	BL	2893.23	BL	140.363	55.7061	7.44934	13.1111	BL	2.38743	158.888	5.57938	1.06664	9.85824	BL	BL	BL	1.43015	BL	BL	BL	3.11789	85.6112	2194.55	75.6525	BL	38.7308	7.35355	49.7286	58.9851	6335.47	126.575	0.250951	4.41667	6.83162	BL	14.3148	71.5144	BL
2010-08-31	7.25401	2230.26	318.609	1911.66	133.567	26.4806	40.0139	91.6402	BL	845.996	BL	63.9819	50.8518	3.49789	3.0499	BL	1.30039	33.7351	1.47115	1.09118	6.21001	BL	0.659071	BL	1.97783	BL	BL	BL	BL	93.0797	739.575	29.8473	9.25366	24.1898	7.51105	140.84	80.0371	2006.04	71.5699	0.19895	5.93736	4.5346	BL	9.59913	49.9404	BL
2010-09-02	10.9574	1748	230	1518	161.061	27.8154	33.3532	88.5386	BL	1637.31	BL	105.593	32.7296	4.3962	3.91335	BL	BL	30.8337	2.13202	1.01619	5.90844	BL	BL	BL	BL	BL	BL	BL	BL	49.7624	530.624	23.1767	BL	8.56388	6.27674	30.3918	26.3635	1542.84	34.3917	0.21993	2.28654	2.78626	BL	BL	31.4953	BL	0.117638	19.4336	3.96528
2010-09-04	8.50047	1539.53	162.79	1376.74	387.185	60.5631	37.5065	114.686	BL	1037.45	34.7796	56.619	69.03	4.17573	3.2325	1.73944	1.39919	38.4414	1.4891	2.22493	5.37702	BL	BL	BL	2.4387	BL	BL	BL	BL	72.2225	203.076	6.7799	BL	5.92344	9.97033	5.54279	42.0434	663.511	17.3823	BL	BL	BL	BL	BL	11.8277	BL
2010-09-06	5.2331	2309.5	211.646	2097.86	77.5245	17.6968	18.9236	63.06	BL	347.502	BL	52.2464	55.1628	BL	BL	BL	1.21791	20.581	0.620601	BL	4.24379	BL	BL	1.33867	BL	BL	BL	BL	BL	25.7495	131.734	7.04755	9.13305	6.79512	7.96543	BL	40.8049	351.266	11.8256	0.171662	2.86718	3.26122	BL	4.16552	6.75845	BL
2010-09-08	6.51673	2360.41	265.11	2097.63	61.2355	12.7797	27.8142	109.904	BL	571.183	BL	67.9143	81.3633	BL	BL	BL	2.0975	33.1142	0.900503	1.81967	9.65399	BL	2.09476	BL	BL	BL	BL	BL	BL	18.5311	191.943	9.3077	BL	12.5784	3.62694	BL	34.7623	469.235	16.5756	0.259216	2.80908	4.07048	BL	4.42986	7.26333	BL	0.128473	12.3778	0.904785
2010-09-10	11.1561	3430.47	448.868	2983.93	49.4891	14.6454	32.7137	80.4059	BL	1181.1	8.01993	122.786	60.0226	4.59592	13.733	1.62565	1.84957	40.9899	4.53071	1.64249	12.277	BL	BL	BL	BL	BL	BL	64.7845	6.58319	37.7807	990.151	61.263	BL	47.6324	4.45693	BL	31.4647	2597.81	93.9962	0.283998	9.45068	11.7894	BL	16.9413	15.9396	BL
2010-09-12	14.1932	4177.03	427.936	3751.42	54.0543	25.0782	69.7701	177.483	BL	1632.52	6.95289	217.278	78.5499	9.00476	BL	BL	3.55434	72.4049	1.13647	1.88357	14.845	BL	1.50487	BL	BL	BL	BL	BL	5.60725	42.3578	1336.32	118.543	BL	55.7473	7.37683	47.9961	55.1848	3871.24	106.594	0.378011	10.7106	11.6603	BL	21.9715	13.2527	BL
2010-09-14	12.8356	4434.77	588.385	3841.52	36.3161	BL	33.9505	114.085	BL	1614	BL	240.321	25.2403	7.43852	BL	BL	2.99011	45.1887	1.97824	2.34588	16.42	BL	BL	BL	4.38011	BL	BL	BL	5.39903	NA	NA	NA	NA	NA	NA	NA	NA	NA	NA	NA	NA	NA	NA	NA	NA	NA
2010-09-16	NA	NA	NA	NA	NA	NA	NA	NA	NA	NA	NA	NA	NA	NA	NA	NA	NA	NA	NA	NA	NA	NA	NA	NA	NA	NA	NA	NA	NA	NA	NA	NA	NA	NA	NA	NA	NA	NA	NA	NA	NA	NA	NA	NA	NA	NA
2010-09-18	NA	NA	NA	NA	NA	NA	NA	NA	NA	NA	NA	NA	NA	NA	NA	NA	NA	NA	NA	NA	NA	NA	NA	NA	NA	NA	NA	NA	NA	NA	NA	NA	NA	NA	NA	NA	NA	NA	NA	NA	NA	NA	NA	NA	NA	NA
2010-09-20	NA	NA	NA	NA	NA	NA	NA	NA	NA	NA	NA	NA	NA	NA	NA	NA	NA	NA	NA	NA	NA	NA	NA	NA	NA	NA	NA	NA	NA	NA	NA	NA	NA	NA	NA	NA	NA	NA	NA	NA	NA	NA	NA	NA	NA	NA
2010-09-22	NA	NA	NA	NA	NA	NA	NA	NA	NA	NA	NA	NA	NA	NA	NA	NA	NA	NA	NA	NA	NA	NA	NA	NA	NA	NA	NA	NA	NA	NA	NA	NA	NA	NA	NA	NA	NA	NA	NA	NA	NA	NA	NA	NA	NA	NA
2010-09-24	NA	NA	NA	NA	NA	NA	NA	NA	NA	NA	NA	NA	NA	NA	NA	NA	NA	NA	NA	NA	NA	NA	NA	NA	NA	NA	NA	NA	NA	NA	NA	NA	NA	NA	NA	NA	NA	NA	NA	NA	NA	NA	NA	NA	NA	NA
2010-09-26	13.9537	3885.46	563.705	3321.75	64.4033	13.0171	28.0874	80.4615	BL	1959.28	13.8133	160.604	35.414	BL	BL	BL	1.54452	45.5359	1.0809	2.42486	16.0363	BL	BL	1.12821	BL	BL	BL	BL	6.26448	49.3109	1354.09	75.148	BL	33.4121	10.9244	21.1894	50.359	3835.02	72.3579	0.375278	10.2553	15.1892	BL	24.7408	19.9897	BL	0.220558	10.8081	1.93008
2010-09-28	19.2594	5235.42	855.292	4380.13	74.2498	22.2922	39.3989	126.944	BL	2627.67	8.32851	235.584	52.4339	BL	6.69841	BL	1.92663	61.717	4.40979	2.54412	26.9783	BL	0.816581	5.73274	BL	BL	BL	BL	8.70031	70.8288	1866.37	150.578	11.3931	60.4333	39.5656	1.29569	46.0437	7801.96	162.608	0.791748	11.7859	15.3183	BL	21.2805	25.899	BL
2010-09-30	22.1831	4004.32	557.235	3447.08	34.3753	9.11974	19.7415	90.9492	BL	3631.31	7.69048	197.289	28.6129	BL	9.29923	BL	1.31468	44.4834	4.27671	1.80488	14.8692	BL	BL	3.78082	BL	BL	BL	BL	6.48164	39.3352	3056.86	148.596	10.1661	49.8485	30.4273	1.2134	20.7472	12270	167.904	0.219411	6.25082	10.1833	BL	20.2499	46.3963	BL
2010-10-02	14.195	3205.36	524.867	2680.49	52.5062	13.2181	60.7428	162.126	BL	2247.95	12.7517	120.2	67.2884	5.44231	17.0767	BL	BL	52.7655	6.94015	2.62859	9.65159	1.83021	BL	2.64444	BL	BL	BL	BL	BL	27.8699	1083.69	42.9613	3.4607	8.91607	21.9081	BL	26.8192	4185.39	64.9372	0.109598	4.22975	2.12065	BL	6.99399	37.9835	BL	0.153522	30.9008	11.852
2010-10-04	9.77776	2241.9	410.367	2725.7	60.2117	9.28234	19.0742	61.6944	BL	1086.31	8.01702	131.735	26.7116	BL	3.52574	BL	2.50648	33.0402	1.8737	1.24621	11.6245	BL	0.945303	4.24416	BL	BL	BL	BL	2.22724	25.0086	314.974	24.6135	1.89077	3.62844	15.6593	1.34857	34.1599	1107.66	30.6416	0.145279	4.07346	2.03409	BL	4.82583	9.62585	BL
2010-10-06	8.44617	2241.98	410.382	1831.6	59.2385	10.4511	13.0377	51.2219	BL	1160.4	7.03539	59.1543	13.2628	BL	5.24989	1.68966	BL	26.7444	2.71861	1.37581	8.79429	0.857026	BL	3.00327	BL	BL	BL	BL	BL	35.3458	584.306	21.9702	3.84633	6.39779	17.1561	1.61945	22.0246	2164.2	46.8348	0.0890276	4.36381	2.24054	BL	5.80386	29.066	BL
2010-10-08	8.20386	1840.21	257.024	1581.02	55.0869	BL	7.50635	48.9938	BL	1398.74	BL	52.4927	10.9937	BL	4.06815	BL	1.78949	41.8505	1.78745	1.05489	10.7717	BL	BL	2.21853	BL	BL	2.32709	BL	3.60734	28.9202	721.882	19.3716	3.57099	3.68452	21.7119	BL	21.2586	2679	32.3179	0.101835	3.65091	1.84928	BL	3.859	50.3529	BL	0.0481303	15.8706	3.34783
2010-10-10	2.31708	1202.98	179.259	1023.72	10.5928	BL	7.49734	38.6488	BL	270.95	BL	22.1511	7.36751	BL	BL	BL	BL	12.0214	0.648445	BL	4.85359	BL	1.00745	1.14015	BL	BL	2.4339	BL	BL	7.32976	70.022	2.80598	0.998396	1.01762	19.458	BL	14.2398	220.698	4.69432	BL	3.18721	BL	BL	1.74323	2.81354	BL
2010-10-12	4.08961	1814.16	200.853	1613.3	72.5297	15.8597	16.0857	48.0969	5.35764	365.373	36.4559	29.0524	32.7005	4.49788	BL	BL	BL	21.1282	1.08989	0.891394	6.04071	BL	BL	1.7807	BL	BL	BL	BL	1.98736	19.7887	85.3094	3.71589	1.80649	1.76356	29.0709	7.23682	30.208	287.977	6.50192	0.177783	3.55933	BL	BL	2.86104	3.11769	BL
2010-10-14	2.60133	1676.06	112.313	1565.9	28.6963	BL	BL	28.7967	BL	136.888	BL	37.2969	26.2551	BL	BL	BL	BL	14.475	0.614472	0.906403	5.01661	BL	BL	2.31091	BL	BL	BL	BL	1.83348	7.01026	16.0807	1.93082	1.07587	2.23622	18.6493	BL	34.3436	71.9912	4.77604	0.141818	1.3736	BL	BL	d.l	d.l	BL	0.0811208	9.56656	0.420844
2010-10-16	4.50753	2419.01	360.691	2058.32	11.2498	BL	12.9375	44.3514	BL	286.285	BL	92.5523	15.6625	BIGBLAPPALLATO	BL	BL	BL	BL	BL	BL	BL	BL	BL	BL	BL	BL	BL	BL	BL	15.613	166.496	37.2241	2.23872	6.70673	23.9547	BL	45.0143	572.759	22.0389	0.311271	2.71371	BL	BL	5.13413	6.51696	BL
2010-10-18	4.91317	2632.78	280.772	2354.17	24.7846	9.68142	10.5132	39.1057	BL	308.453	10.6185	82.2882	30.3268	BL	BL	BL	1.89424	16.5013	BL	1.39939	9.54107	BL	BL	2.33835	BL	2.42885	BL	BL	BL	37.0651	240.118	58.8125	4.32229	13.546	31.905	20.2499	85.8389	813.891	38.6098	0.491059	3.4067	3.75417	BL	10.7599	9.03832	BL
2010-10-20	4.90072	2045.43	345.585	1702.01	24.5978	BL	BL	24.2058	BL	538.858	5.69899	71.9666	17.338	BL	BL	BL	BL	13.0634	BL	0.699239	5.86762	1.28585	BL	2.43685	BL	BL	BL	BL	BL	12.2144	204.282	17.6898	1.97493	3.35808	16.9849	BL	28.1344	684.188	12.8305	0.111376	1.89197	BL	BL	3.27139	3.03127	BL	0.0341399	10.0282	0.588653
2010-10-22	3.63628	1721.32	239.732	1481.59	139.284	22.4734	25.7792	75.5393	BL	350.369	11.3183	54.8455	23.9311	BL	BL	BL	BL	18.8829	0.723993	0.980864	3.65842	BL	BL	3.34587	BL	BL	BL	BL	BL	104.865	226.3	21.6727	7.79014	7.73205	23.0681	BL	164.693	930.65	26.845	0.162041	1.90958	BL	BL	2.48739	12.4892	BL
2010-10-24	2.37179	1332.61	235.421	1097.19	BL	BL	BL	16.9928	BL	89.2401	BL	31.4232	16.1526	BL	BL	BL	BL	9.07774	0.528852	1.10853	4.41488	0.687852	BL	BL	BL	BL	BL	BL	BL	7.01824	39.3635	7.27046	3.14049	5.84651	13.8532	BL	24.3927	131.693	6.88985	0.138708	1.6239	BL	BL	2.22107	d.l	BL
2010-10-26	9.1364	3357.04	492.539	2955.23	22.0538	12.9303	18.1168	71.3803	BL	1005.01	BL	68.5682	27.3193	BL	BL	2.04243	BL	28.5205	1.70571	0.886895	26.9943	BL	BL	2.63885	BL	BL	BL	BL	35.7962	14.4972	589.421	29.9504	6.17736	17.5208	27.4754	1.30325	40.331	2153.22	43.7635	0.210001	3.25641	4.50229	BL	8.10772	6.13229	BL	0.245516	23.8226	2.45321
2010-10-28	13.7646	4153.72	624.247	3527.32	27.0395	BL	30.2979	102.355	7.36622	1694.81	8.02491	106.649	96.4908	BL	3.53253	BL	2.20814	40.884	1.94465	2.05534	11.5362	1.54856	BL	3.35019	BL	BL	BL	BL	BL	23.1751	1118.43	51.9715	8.02625	68.2014	20.9858	BL	107.787	4173.22	86.1902	0.289192	6.28713	11.2991	BL	15.8249	10.8203	BL
2010-10-30	14.4046	4823.07	952.518	3872.71	60.5881	8.99484	15.0248	68.9912	BL	1573.33	11.6724	127.207	32.853	BL	3.57398	BL	2.24734	47.3058	1.72141	2.85293	19.4986	BL	1.22953	3.60675	BL	BL	4.14329	BL	8.23648	57.8059	1183.83	88.1958	8.23212	84.9564	19.0984	12.7357	146.161	3683.15	97.7709	BL	11.2893	18.6296	BL	27.6566	21.0447	BL
2010-11-01	11.981	4084.01	654.392	3427.46	22.8587	BL	5.27635	36.1592	BL	958.996	5.9047	116.235	25.3993	BL	BL	BL	1.8781	27.4409	1.49942	1.41902	14.4261	2.15707	BL	4.25679	BL	2.51651	BL	5.41342	BL	22.9566	672.038	64.3971	4.15453	25.6626	15.4595	9.98907	222.401	1922.34	70.9474	0.128893	8.77904	13.9495	BL	20.6085	11.6124	BL	0.133841	16.218	2.12196
2010-11-03	2.88634	1524.84	257.019	1267.82	74.0893	15.9728	13.378	38.3135	BL	169.404	22.6274	32.647	27.5127	BL	BL	BL	BL	16.2644	0.912785	0.890099	3.84659	BL	BL	BL	BL	BL	BL	BL	BL	45.6177	92.8444	12.29	3.26102	7.87267	22.6651	BL	91.7903	266.67	9.11376	0.119862	1.75781	2.26486	BL	3.26178	2.86989	BL
2010-11-05	4.85222	1142.53	120.948	1019.42	425.514	52.5971	8.92425	22.1672	BL	111.972	635.72	47.1141	20.1146	BL	BL	BL	BL	9.35154	BL	0.813202	3.29457	BL	BL	BL	BL	BL	BL	BL	BL	115.571	13.1696	4.90736	7.3687	7.69174	161.651	BL	67.8177	69.4829	2.5426	0.139623	BL	BL	BL	BL	BL	BL
2010-11-07	4.82197	2330.5	429.813	1902.84	NA	NA	NA	NA	NA	NA	NA	NA	NA	NA	NA	NA	NA	NA	NA	NA	NA	NA	NA	NA	NA	NA	NA	NA	NA	36.902	196.936	39.5957	6.92932	13.7156	19.8291	3.71453	76.0982	603.423	21.6042	0.140587	4.48298	5.24028	BL	8.2806	5.56417	BL	0.0398441	11.3417	0.862583
2010-11-09	2.26259	1524.84	332.613	1192.22	NA	NA	NA	NA	NA	NA	NA	NA	NA	NA	NA	NA	NA	NA	NA	NA	NA	NA	NA	NA	NA	NA	NA	NA	NA	26.5452	49.2042	29.2435	3.67629	6.72423	16.8679	13.202	56.8515	173.474	7.85978	0.145659	2.31959	BL	BL	4.33944	2.53433	BL
2010-11-11	7.53932	2987.47	669.644	2322.15	NA	NA	NA	NA	NA	NA	NA	NA	NA	NA	NA	NA	NA	NA	NA	NA	NA	NA	NA	NA	NA	NA	NA	NA	NA	44.9658	432.152	49.8956	8.13335	31.6128	23.5503	15.485	80.5886	1414.02	44.7777	0.124271	6.19333	10.3969	BL	15.797	8.71363	BL
2010-11-13	0	4896.42	976.26	3915.84	NA	NA	NA	NA	NA	NA	NA	NA	NA	NA	NA	NA	NA	NA	NA	NA	NA	NA	NA	NA	NA	NA	NA	NA	NA	107.047	401.27	111.559	11.1421	29.6564	23.219	3.24516	302.099	1360.98	60.1238	0.283149	9.58893	12.8983	BL	19.0551	15.7956	BL	0.146771	16.3953	1.48188
2010-11-15	8.84517	2898.23	501.034	2397.19	161.485	22.7623	12.4672	48.4539	BL	1126.67	15.7472	120.426	28.2929	BL	2.99723	1.65683	BL	14.6736	1.11806	BL	7.7383	BL	BL	4.67929	BL	BL	BL	BL	5.65864	146.722	656.615	85.2644	15.1486	32.577	21.5362	BL	71.9661	2402.11	77.2857	BL	3.65227	2.25651	BL	7.03092	23.8656	BL
2010-11-17	10.1888	3678.39	712.782	2961.28	104.301	21.4754	50.715	237.322	5.87931	1147.83	5.57047	147.395	25.3624	BL	6.35341	BL	BL	36.3614	2.33161	1.42102	8.94055	BL	BL	6.38425	BL	BL	BL	BL	5.44056	105.075	830.033	111.514	15.9315	42.6699	23.5652	67.4776	98.2654	2688.56	100.025	0.249172	5.28244	4.72984	BL	12.6144	27.8597	BL
2010-11-19	11.733	5611.13	1118.77	4492.36	58.0763	18.7896	80.7381	214.547	BL	758.714	15.8695	228.285	45.5458	7.27484	6.02023	1.59755	1.72681	68.2376	2.62374	2.23798	16.0851	BL	BL	4.71518	BL	BL	BL	6.09725	8.85613	52.7863	548.566	170.979	12.1475	49.4914	16.9716	214.459	131.534	1854.7	120.504	0.386037	10.5717	9.37257	BL	22.2207	21.5043	BL	0.084403	45.7535	5.17478
2010-11-21	10.3756	3263.44	624.179	2637.1	135.982	37.1212	72.0951	261.706	BL	1250.03	5.64933	150.053	35.8224	6.32968	8.59132	BL	2.2209	56.8079	3.29931	1.93028	11.1667	0.889016	BL	4.42907	BL	1.85326	BL	BL	BL	129.534	946.18	122.131	13.2259	27.3209	22.0209	35.0723	79.45	3281.18	106.65	0.254664	5.17662	3.46243	BL	10.8602	31.7415	BL
2010-11-23	6.649	1606.88	250.535	1358.51	607.749	79.5538	60.2091	201.021	BL	663.64	315.795	75.8975	56.3439	5.84485	3.09402	BL	1.39082	43.8645	1.3563	1.09343	7.01152	BL	BL	2.61957	1.08189	BL	BL	BL	4.03858	425.607	246.579	40.1771	28.5644	22.7798	216.198	BL	365.117	1240.93	42.7893	0.87712	BL	BL	BL	3.32367	10.0977	BL
2010-11-25	6.26933	2373.69	380.136	1993.56	201.348	31.3434	16.7439	90.0514	BL	685.039	9.98191	97.0768	23.1472	BL	5.54722	BL	2.654	45.2885	2.8471	1.41546	10.3337	BL	BL	3.87605	1.60493	BL	BL	BL	4.43533	179.498	410.946	64.4508	23.9802	21.0693	21.5771	BL	132.629	1646.23	60.4214	0.117022	3.65262	2.99411	BL	6.29949	12.6211	BL	0.0751473	11.8892	4.10757
2010-11-27	5.96502	2183.35	336.896	1846.45	173.87	25.2033	31.3127	147.895	BL	638.587	7.9728	107.988	31.2366	BL	3.97812	BL	BL	28.8396	1.86615	1.44789	9.21366	BL	BL	2.92357	BL	1.57088	BL	BL	5.47437	143.272	321.295	64.1236	19.8749	23.5544	19.2347	79.3487	197.377	1187.97	49.1616	0.431932	4.15649	BL	BL	7.39374	11.1422	BL
2010-11-29	6.35883	1436.26	200.86	1235.4	457.48	59.8844	42.8292	177.295	7.36572	599.095	231.84	86.3894	38.3345	3.71815	3.75038	BL	1.38015	35.0115	1.28673	1.20088	8.68662	1.03245	0.804206	3.76146	BL	BL	BL	BL	BL	354.292	283.585	57.1993	26.1504	20.0462	176.759	12.7731	415.821	1234.73	43.5938	0.524566	4.02002	2.9208	BL	6.41762	13.3504	BL
2010-12-01	3.62437	1047.42	123.099	924.322	263.081	37.8292	6.77238	53.9408	BL	150.573	240.778	44.5036	21.1273	BL	BL	BL	BL	9.06006	BL	1.30731	5.41226	BL	BL	BL	BL	BL	6.21845	9.22	3.31762	188.828	60.7143	28.566	16.9479	10.8133	190.044	BL	247.008	250.447	8.8259	0.328557	1.69079	d.l	BL	2.58879	BL	BL	0.0250462	9.70057	1.43455
2010-12-03	7.05487	4205.34	827.244	3378.09	39.5525	13.9998	11.7626	40.5954	BL	379.546	BL	114.298	57.5237	BL	4.12946	BL	2.0953	29.3474	2.43116	1.93522	9.43438	BL	BL	1.73983	BL	BL	BL	5.97555	3.7138	32.6159	172.624	51.2188	12.1254	24.8485	17.9617	BL	117.286	550.551	25.9269	0.121256	5.03276	5.07171	BL	7.84721	4.09703	BL
2010-12-05	3.27307	2075.67	412.542	1663.13	16.4211	BL	8.79973	41.8575	BL	241.522	BL	44.4913	13.164	BL	BL	BL	BL	11.7605	2.12199	2.10432	9.82923	BL	BL	BL	BL	BL	BL	6.82111	1.94531	35.5353	172.17	39.1841	6.92436	21.3353	41.6977	26.7035	92.457	516.023	13.7277	0.266929	3.44007	3.41404	BL	9.08594	3.62172	BL
2010-12-07	9.37825	5377.97	1041.04	4339.09	109.468	14.1619	BL	25.2434	BL	524.71	6.27639	162.326	38.0815	BL	BL	BL	BL	17.3161	1.1202	2.11168	8.51379	BL	BL	2.57437	BL	BL	BL	BL	BL	86.7889	259.057	101.318	10.2084	27.1124	28.9092	BL	165.054	946.038	36.4958	0.276142	6.11106	7.00072	BL	10.5712	7.96076	BL	0.0790942	15.0857	1.84736
2010-12-09	6.71084	3200.75	634.966	2565.78	71.2252	19.457	16.2935	67.4121	BL	452.223	13.1778	94.904	86.014	3.82173	4.17424	BL	2.0725	40.9333	4.53639	3.9772	10.1142	1.27623	BL	3.03763	BL	BL	BL	BL	BL	67.3764	253.04	63.9277	9.77969	40.3912	30.9894	3.40927	161.602	904.72	23.8135	0.2649	4.63344	4.01474	BL	7.85449	2.90589	BL
2010-12-11	9.33103	5192.79	801.383	4389.25	34.5732	7.31037	14.1848	50.8229	BL	316.567	8.13948	163.172	43.862	BL	5.38949	BL	1.7896	36.4166	2.92856	4.68147	14.2367	1.7645	BL	4.24752	BL	BL	BL	BL	BL	26.9783	201.457	113.032	8.77225	48.75	14.4359	18.7624	176	630.312	47.51	0.16792	8.62403	10.0724	BL	15.6882	7.09519	BL
2010-12-13	7.25966	3114.41	421.159	2691.1	76.9402	BL	BL	25.8064	BL	771.095	BL	82.413	8.25369	BL	BL	BL	BL	10.9128	0.705148	0.863218	11.0778	BL	BL	2.10378	BL	BL	BL	BL	2.69829	71.8842	591.276	73.512	8.24733	29.6467	23.1185	67.403	116.65	2035.88	35.5861	0.16232	6.8137	7.42567	BL	19.0044	3.81146	BL	0.110887	10.1261	2.04971
2010-12-15	10.8774	4399.33	501.053	3898.28	62.7723	BL	6.15578	43.9358	BL	1413.39	BL	98.7128	14.2825	BL	BL	BL	1.49585	16.3516	BL	0.647427	11.1006	BL	BL	2.73129	BL	BL	BL	BL	2.72952	61.0908	962.014	84.0978	6.51318	18.0525	25.8537	3.84985	70.2224	3224.65	30.9316	0.364087	5.42774	8.90005	BL	14.7483	8.52179	BL
2010-12-17	10.7997	5069.11	801.296	4265.66	56.8814	7.53692	BL	23.3604	BL	905.996	7.10865	122.452	10.2539	4.31112	2.75707	BL	1.82378	18.0098	1.37435	1.51662	12.3339	BL	BL	4.12871	BL	BL	BL	BL	3.45677	50.2461	733.595	102.847	5.72695	18.9004	28.5479	1.46559	407.355	2141.03	48.9942	0.197184	7.53604	9.77075	BL	15.8542	10.5416	BL
2010-12-19	6.54651	3155.68	414.709	2740.97	21.1404	BL	BL	16.2561	BL	517.932	BL	87.9364	BL	BL	BL	BL	BL	8.31343	BL	1.5308	12.5162	BL	BL	BL	BL	BL	BL	BL	4.75546	16.5869	398.49	63.8573	2.86813	2.79321	22.6024	30.1096	244.641	1141.85	24.7298	BL	5.26016	7.44535	BL	12.5299	8.82997	BL	0.0628796	12.0465	0.570769
2010-12-21	6.57628	3628.31	375.789	3252.52	71.4839	BL	BL	28.8884	BL	529.825	10.62	101.692	11.5795	BL	3.10843	BL	BL	7.89949	BL	1.10036	7.66079	BL	BL	4.19805	BL	BL	BL	BL	2.20513	44.5864	293.85	58.949	3.27973	2.10042	20.9505	BL	85.6204	948.988	26.645	0.109487	4.8734	5.79608	BL	10.021	5.46334	BL
2010-12-23	7.00532	1282.91	161.984	1120.93	851.076	116.056	29.0807	83.069	BL	263.671	1091.17	68.9806	52.7717	BL	BL	BL	BL	23.2275	1.04373	BL	5.90993	BL	BL	6.2843	BL	BL	BL	BL	BL	596.639	65.6895	32.2351	42.3934	20.8609	710.735	BL	410.633	453.587	14.5537	0.394714	1.81495	BL	BL	2.3368	2.90912	BL
2010-12-25	5.55404	1252.72	47.5171	1205.21	936.745	108.418	32.3826	87.7045	BL	213.291	1333.97	53.3477	60.3804	BL	2.78389	BL	BL	24.2526	0.869374	BL	6.21138	BL	BL	3.23348	BL	BL	BL	BL	BL	435.569	33.9246	20.8576	41.8028	20.1228	627.009	BL	179.576	247.128	6.02293	0.326605	BL	BL	BL	BL	BL	BL	D.L.	17.5069	1.26707
2010-12-27	5.00339	2993.57	406.055	2587.52	59.3264	BL	6.01021	34.4127	BL	270.643	6.55257	72.0284	BL	BL	2.82797	BL	BL	6.10251	1.79773	1.08305	8.93892	BL	BL	5.71118	BL	1.91444	BL	BL	4.99343	44.4444	111.752	37.6379	17.1385	11.2412	27.9531	32.4487	84.7456	334.836	15.3006	0.18735	3.92265	3.61608	BL	6.38498	3.26047	BL
2010-12-29	6.47031	3149.75	528.553	2524.11	78.7446	12.6883	8.30329	22.0785	BL	469.49	9.43973	98.3822	16.296	BL	4.67241	BL	BL	8.46695	1.87797	0.994978	9.07231	BL	BL	7.13146	BL	BL	BL	BL	2.762	61.147	285.553	73.1363	14.3874	12.8284	22.9888	26.9477	84.1783	966.609	29.9577	0.119389	5.88264	4.02654	BL	9.93383	7.70179	BL
2010-12-31	5.72355	1652.27	315.335	1339.09	439.689	63.4717	11.8845	32.1562	BL	306.607	341.676	65.9838	26.3989	BL	BL	BL	BL	10.2568	1.25843	0.815128	5.80082	BL	BL	1.49576	BL	BL	BL	8.12848	BL	313.68	131.541	43.0859	26.8987	14.5248	243.271	11.221	335.139	579.632	21.5968	0.254552	2.98311	BL	BL	4.11572	5.74993	BL	D.L.	7.12384	2.75787
2011-01-02	5.64521	2064.79	190.065	1872.57	625.337	68.6032	BL	25.5587	BL	159.575	887.214	80.433	99.2431	BL	BL	BL	BL	9.57093	0.729868	0.784446	5.618	BL	BL	2.36979	BL	BL	BL	BL	BL	431.655	45.0894	41.2565	45.2366	23.7175	591.475	49.5545	245.666	278.583	6.93714	0.224128	2.86999	BL	BL	5.22548	BL	BL
2011-01-04	3.35814	1619.93	194.392	1425.54	BL	BL	5.01549	14.7208	BL	120.692	7.45685	60.9301	BL	BL	BL	BL	BL	4.2765	BL	BL	5.90785	BL	BL	2.55587	BL	BL	BL	6.86615	BL	11.5972	92.8634	27.5416	12.2682	10.6045	27.865	BL	106.667	174.61	5.46977	BL	3.8631	3.43505	BL	4.4302	BL	BL
2011-01-06	5.35536	1719.19	172.783	1544.25	239.901	29.0762	BL	14.6232	BL	309.219	205.326	55.1686	11.1355	BL	BL	BL	BL	4.89496	1.80962	BL	3.15195	BL	BL	2.75552	BL	BL	BL	BL	BL	160.769	160.173	33.955	16.5692	12.2969	153.07	BL	176.239	492.977	10.3628	0.116563	3.29353	3.93606	BL	6.50595	2.85687	BL	D.L.	4.85867	1.53183
2011-01-08	4.5377	1809.9	257.015	1552.89	NA	NA	NA	NA	NA	NA	NA	NA	NA	NA	NA	NA	NA	NA	NA	NA	NA	NA	NA	NA	NA	NA	NA	NA	NA	37.9588	127.971	33.2116	10.6005	10.5934	41.8319	2.24528	66.3319	358.406	10.3214	0.143738	3.95882	3.02494	BL	6.29268	2.26292	BL
2011-01-10	8.98301	2483.94	330.472	2153.46	NA	NA	NA	NA	NA	NA	NA	NA	NA	NA	NA	NA	NA	NA	NA	NA	NA	NA	NA	NA	NA	NA	NA	NA	NA	219.619	704.351	70.4146	25.4195	21.1373	74.5447	5.96415	283.105	2441.81	28.5256	BL	7.82258	16.2344	BL	21.6689	9.50534	BL
2011-01-12	5.5371	1788.24	317.477	1470.76	18.826	BL	BL	10.9866	5.0657	588.963	BL	50.9517	BL	BL	BL	BL	BL	6.73048	1.25956	0.602184	6.12012	BL	BL	3.64437	BL	BL	BL	BL	2.67255	15.911	426.443	34.3834	7.91837	3.22184	28.2187	2.54145	78.5706	1302.38	17.2096	BL	5.8047	11.6738	BL	15.1605	5.1696	BL	0.0664388	12.7031	0.887454
2011-01-14	12.1604	4410.37	727.862	3682.51	34.3192	BL	12.8595	24.7402	BL	824.84	9.4007	183.103	21.2243	BL	BL	BL	BL	19.7004	0.816066	1.27072	11.5199	BL	BL	3.44566	BL	BL	BL	13.5922	BL	30.5691	873.184	137.976	10.0324	36.8291	27.6562	5.00651	947.598	2048.74	48.6164	BL	13.8873	28.2305	BL	41.6678	12.9193	BL
2011-01-16	13.0662	5477.12	710.557	4881.03	31.4561	BL	8.4395	27.3896	BL	1441.37	15.4461	180.153	13.7928	BL	BL	BL	BL	21.185	0.604463	1.0868	12.175	BL	BL	2.84934	BL	BL	BL	BL	BL	33.7844	992.247	125.154	3.03937	24.8863	45.9526	3.99483	214.915	3143.98	46.0173	0.278049	13.9223	25.0079	BL	35.2861	12.5372	8.74427
2011-01-18	12.3421	4976.36	504.127	4472.24	17.246	BL	BL	29.0195	BL	1116	14.6832	154.623	11.0265	BL	BL	BL	BL	12.9421	0.965713	1.26128	6.62991	BL	BL	2.53165	BL	BL	7.26296	16.6652	BL	20.2646	937.887	120.926	2.47972	3.10974	36.8849	3.71707	434.931	2705.73	59.9062	0.100843	14.614	23.8708	BL	34.5729	11.0243	BL	0.186345	6.117	0.530311
2011-01-20	7.98664	4250.85	669.595	3581.25	34.2288	6.27068	BL	20.7046	BL	569.893	10.4102	149.502	12.6269	3.44491	BL	BL	1.47237	29.772	0.839396	1.52137	9.45008	1.38925	BL	2.28344	BL	BL	BL	BL	BL	29.1317	317.065	91.343	3.90932	45.6979	16.7452	6.46183	112.582	967.829	39.5748	0.113871	9.77422	13.2455	BL	21.3575	5.36098	BL
2011-01-22	8.39823	3931.39	611.309	3320.08	27.0667	BL	BL	33.7865	BL	734.535	BL	128.143	16.7836	BL	BL	BL	BL	16.9938	0.652086	1.42401	10.4692	1.30282	BL	1.76926	BL	BL	BL	BL	BL	26.4694	486.017	87.9431	3.71414	39.8205	17.4882	3.89431	159.52	1506.68	46.0863	0.20331	11.6467	14.3732	BL	24.4125	11.4383	BL
2011-01-24	17.67	7641.11	1008.88	6634.39	41.1973	8.48273	6.28368	31.9039	BL	1284.88	16.5135	268.506	15.8813	BL	BL	BL	BL	27.7592	BL	0.99871	20.7029	1.76981	BL	2.43447	BL	BL	BL	BL	3.46932	44.4451	957.433	196.447	4.96817	49.5175	21.3133	38.4156	485.922	2899.65	84.1026	0.189106	18.7614	25.3412	BL	42.7868	18.8952	BL	0.0544366	10.4919	0.384606
2011-01-26	9.45639	3905.04	524.848	3380.19	17.6098	BL	BL	25.0451	BL	908.621	7.29378	120.348	BL	BL	BL	BL	BL	12.4071	0.910621	1.27454	8.99541	BL	BL	BL	BL	BL	BL	BL	2.53612	20.6691	495.921	82.393	1.76674	11.0375	13.5334	25.6878	111.316	1554.78	33.8972	0.224768	8.26119	12.5425	BL	21.6227	7.54101	BL
2011-01-28	14.2026	5992.65	1043.65	4951.38	91.348	19.1348	9.26312	60.4716	BL	1098.95	10.9921	252.458	55.2053	BL	3.61062	BL	BL	28.8293	3.23116	1.55279	15.2157	BL	BL	5.41725	BL	BL	BL	BL	11.2626	78.6787	686.835	171.044	6.62444	31.3539	21.9658	2.29593	137.666	2395.68	59.0526	0.116496	14.8484	21.7757	BL	34.9956	11.0509	BL
2011-01-30	11.2055	4261.34	1034.56	3226.78	232.304	30.3055	8.90424	29.2877	5.71726	594.363	14.2358	111.164	14.8773	BL	2.59376	BL	1.23499	20.2748	1.39911	1.11257	8.89522	BL	BL	4.60693	BL	BL	BL	BL	3.0079	206.738	459.766	72.9751	15.2138	19.6294	27.1471	10.859	994.618	1174.63	48.8965	0.0953736	8.60356	11.4329	BL	19.1831	10.522	BL	0.143858	6.94526	1.12398
2011-02-01	4.27164	2146.67	315.306	1831.37	41.4826	BL	BL	15.9272	BL	238.944	BL	64.6412	9.81522	BL	BL	BL	BL	9.46737	BL	BL	8.77138	BL	BL	2.4313	BL	BL	BL	BL	BL	28.7296	169.284	37.7281	5.54364	2.79276	14.3119	15.8917	112.193	471.298	16.2113	0.174302	4.43935	5.66371	BL	9.46734	2.95125	BL
2011-02-03	5.9956	2483.85	359.164	2124.69	258.087	28.4595	6.76788	17.9497	BL	292.289	89.2856	81.8131	16.8364	BL	4.31222	BL	BL	16.8434	0.77183	1.15659	7.89058	0.998926	BL	5.31281	BL	BL	BL	BL	BL	210.208	178.487	60.5001	17.3294	17.2847	83.5423	26.226	368.166	646.565	32.0776	0.170551	6.16235	6.12397	BL	11.9899	4.43781	BL
2011-02-05	5.53639	2245.85	367.818	1875.87	136.423	17.2065	6.8846	39.4208	BL	551.192	14.9165	87.8142	17.7815	BL	BL	BL	1.22208	13.6712	1.10136	0.778021	7.65435	0.706247	1.08365	6.6519	BL	BL	BL	BL	BL	92.3205	379.172	51.4503	5.08865	1.37259	27.2854	BL	169.692	1058.63	28.6854	0.110363	6.24364	7.85926	BL	10.1743	6.90208	BL	0.0293112	3.5883	1.10603
2011-02-07	5.44583	2466.55	302.909	2107.38	25.4517	BL	BL	18.5985	BL	606.22	9.08612	82.3572	8.52239	BL	BL	BL	BL	9.02858	BL	BL	6.92117	BL	BL	2.55372	BL	BL	BL	BL	1.71733	23.0659	461.343	53.0973	3.02977	1.31142	17.8671	BL	75.0118	1251.77	14.3854	0.140207	7.16104	10.7862	BL	13.2544	4.03457	BL
2011-02-09	17.1544	5775.59	827.244	4946.18	46.3637	BL	10.0239	56.4754	BL	1496.34	14.3904	196.736	18.2991	BL	BL	BL	1.59302	25.9873	BL	1.84626	19.8584	BL	BL	3.26493	BL	BL	BL	BL	11.371	46.9748	1247.22	170.675	7.08605	35.8957	30.4614	3.21944	640.965	3833.97	73.4277	0.280283	17.3117	33.5419	BL	48.6923	10.3295	11.1578
2011-02-11	7.35121	2451.31	360.678	2090.64	153.37	21.5077	BL	25.0007	BL	785.67	18.5116	88.3344	22.3579	BL	BL	BL	BL	13.582	BL	0.785908	8.7295	1.21713	BL	BL	BL	BL	BL	BL	BL	111.636	546.99	53.0391	6.98243	1.58371	31.979	0.813658	365.389	1527.5	16.5326	0.11164	6.87732	12.0408	BL	14.2803	5.40641	BL	0.083579	8.96701	0.311001
2011-02-13	15.9724	5041.04	632.829	4408.21	61.4989	BL	BL	21.8544	BL	1712.83	39.5768	164.6	10.2745	BL	BL	BL	BL	17.9426	1.53854	1.59577	18.2502	1.97336	BL	5.55763	BL	BL	BL	BL	BL	61.7356	1271.03	132.193	9.52936	3.07804	66.753	5.2794	394.421	4103.79	68.3305	0.10499	15.4674	31.7468	BL	39.8962	10.6964	9.28898
2011-02-15	16.7886	4481.32	602.548	3878.77	43.5515	BL	12.851	39.29	BL	2270.66	8.64723	153.151	13.4543	BL	3.01168	BL	2.09068	21.1224	1.2312	1.20983	16.45	2.26234	BL	2.21049	1.80967	BL	BL	BL	BL	43.2669	1612.1	126.419	6.60298	20.6295	48.1764	9.46363	44.9617	5910.03	70.1504	0.18873	15.2414	40.1691	BL	56.0146	12.1567	13.938
2011-02-17	5.1726	2358.49	384.442	1974.05	17.6784	BL	8.56727	23.5535	BL	452.983	5.36268	66.6061	5.64215	BL	BL	BL	BL	13.7642	BL	0.715651	6.18165	BL	BL	2.73454	BL	BL	BL	BL	2.76425	12.8664	260.403	42.5828	3.08327	19.1025	18.4888	BL	54.9398	742.562	16.6046	0.123057	5.52478	4.92872	BL	7.84513	3.62713	BL	0.137155	10.3015	0.425185
2011-02-19	6.26237	1287.37	174.962	1112.41	501.125	98.8617	150.014	350.03	BL	258.416	638.186	83.3812	121.163	7.7678	BL	BL	1.21829	83.2039	0.581208	BL	3.22067	BL	BL	4.72192	BL	BL	BL	BL	BL	233.29	69.8393	22.2479	15.8716	39.4704	293.896	BL	176.798	315.633	8.56504	0.503153	BL	BL	BL	BL	BL	BL
2011-02-21	4.41726	1576.7	172.789	1403.91	312.035	34.3416	BL	37.0308	BL	186.422	234.54	36.6453	16.4511	BL	3.31265	BL	BL	8.17979	0.764013	0.892857	3.84448	BL	BL	2.85851	BL	BL	BL	BL	BL	195.359	84.1493	24.419	17.7039	25.9336	149.797	BL	247.182	315.477	12.8064	BL	2.99461	BL	BL	3.66241	2.39363	BL
2011-02-23	3.68448	1507.5	207.336	1300.17	157.207	17.1637	8.92683	17.0873	BL	326.205	22.9438	40.8291	13.0569	BL	BL	BL	BL	6.53883	1.40638	0.761227	2.56834	BL	BL	4.07071	BL	BL	BL	BL	BL	92.5084	135.503	22.2873	12.7936	13.9098	30.661	BL	133.448	453.795	10.9841	BL	2.63697	BL	BL	3.88653	3.43664	BL	D.L.	5.81489	1.7364
2011-02-25	7.50783	2807.72	280.772	2526.95	438.065	53.1396	9.11771	23.4831	BL	351.921	258.065	99.3778	35.3678	BL	2.39489	BL	2.03715	29.1264	1.28188	0.975536	7.4809	BL	BL	5.07886	BL	BL	BL	BL	BL	376.179	172.541	66.4856	34.0876	34.3464	192.472	BL	530.369	765.983	36.458	BL	6.39547	6.79835	BL	10.1119	5.41875	BL
2011-02-27	6.38349	2784.02	397.408	2386.61	402.585	44.3212	8.48637	32.4414	BL	180.624	407.281	82.7344	30.9639	BL	BL	BL	BL	14.657	1.71269	0.709942	4.31302	BL	BL	3.99072	BL	BL	BL	BL	BL	370.633	83.1126	65.5143	37.5334	30.1701	339.581	12.2626	436.113	405.89	24.4379	0.319595	7.55391	6.93103	BL	12.2364	5.30163	BL
2011-03-01	4.5493	1477.38	157.673	1317.54	261.61	28.003	8.29598	32.1347	BL	313.384	87.6991	53.8653	18.3071	BL	4.5346	BL	BL	12.0489	2.07614	BL	5.51242	BL	BL	4.20165	BL	BL	BL	BL	2.32408	209.297	177.65	37.2185	26.9027	24.952	76.0687	9.31502	302.206	652.087	31.6929	0.11702	4.44461	3.93262	BL	8.28765	6.90291	BL	0.0354542	7.4394	3.83431
2011-03-03	5.95314	2803.81	302.414	2501.4	95.3336	13.2197	9.08947	45.463	BL	216.063	8.44373	114.448	15.9055	BL	BL	BL	BL	12.135	BL	1.01277	4.31094	BL	BL	3.14526	BL	BL	BL	BL	1.50307	88.1187	169.096	79.7101	18.7813	17.4817	23.0578	2.24211	317.294	454.283	30.4671	0.143754	6.83299	7.07138	BL	12.1033	4.61615	BL
2011-03-05	7.1343	3075.98	455.781	2620.2	36.6985	7.58261	6.21391	20.2455	BL	653.981	BL	86.2411	11.8569	BL	BL	BL	1.28958	15.2539	0.693758	0.720092	6.89655	BL	BL	2.0931	BL	BL	BL	BL	BL	33.3171	567.084	70.0838	5.65743	17.3	9.12186	8.57577	263.763	1749.62	35.792	0.23422	8.67952	8.10695	BL	8.88336	11.1427	BL
2011-03-07	7.04818	3281.19	444.981	2834.05	57.4429	BL	7.40993	25.6569	7.66492	664.811	6.88947	106.742	16.5299	BL	BL	BL	1.20414	17.7018	BL	0.803785	6.97721	0.820996	BL	1.96043	BL	BL	BL	BL	BL	44.1892	447.14	59.2726	6.34537	12.3715	11.189	27.82	205.122	1370.74	42.9943	0.111682	9.67813	9.39606	BL	9.80829	8.63029	BL	0.0858353	7.58901	0.762821
2011-03-09	11.8064	3350.32	347.776	3002.54	33.892	7.0743	7.61906	30.4249	BL	1403.27	11.5687	119.88	9.17131	BL	BL	BL	BL	14.9133	0.794337	0.973705	11.3695	BL	BL	2.4671	BL	BL	BL	BL	6.12873	38.1993	1191.9	89.3362	8.49825	27.8536	17.9603	10.2595	528.743	3578.76	79.7853	BL	8.18754	8.84754	BL	13.6511	6.10524	BL
2011-03-11	7.47099	2847.01	449.301	2397.71	20.0883	BL	4.65205	45.2241	BL	896.831	BL	101.544	14.3811	BL	BL	BL	BL	13.9397	0.864923	1.26914	6.20245	BL	BL	1.16955	BL	BL	BL	BL	4.26654	24.2389	482.755	53.2213	2.71967	1.45805	20.2743	2.46509	86.3844	1561.53	25.475	BL	5.01772	6.5549	BL	6.25568	4.54958	BL
2011-03-13	15.4922	4331	611.309	3719.7	46.6779	10.7601	9.36266	49.3593	BL	1872.64	19.6999	148.322	18.5795	BL	3.48566	BL	1.60687	22.1807	1.6518	1.13025	14.678	BL	BL	6.24716	BL	BL	BL	BL	7.00696	52.1535	1508.59	111.66	8.12169	25.406	25.4502	2.05289	270.747	5040.36	105.319	BL	9.46006	12.6955	BL	25.4049	10.2502	BL	0.139433	10.7828	2.40216
2011-03-15	18.211	4441.17	563.787	3877.38	69.9379	9.65784	13.8878	52.4977	7.19835	2002.61	20.5882	230.769	49.5644	BL	4.05126	BL	2.32428	39.9278	2.45613	2.17516	18.3512	BL	0.952237	8.59381	BL	BL	BL	BL	9.17286	61.6058	1548.3	149.904	8.72489	27.2337	33.2628	2.05146	844.845	4674.86	154.533	BL	13.2678	15.1491	BL	36.5459	11.5123	BL
2011-03-17	7.85872	2825.41	356.417	2466.84	40.8073	11.6875	12.9709	44.7579	BL	676.326	11.3044	84.8248	18.4416	BL	5.69499	BL	BL	13.2273	2.40694	1.0307	5.05396	BL	BL	3.81503	BL	BL	BL	BL	BL	51.3015	725.093	84.9555	5.76881	2.88337	14.5645	15.8275	146.798	2195.74	101.072	0.0981861	10.8348	13.5804	BL	19.8528	15.7172	BL
2011-03-19	8.74279	2350.19	289.454	2060.74	130.186	17.4953	13.235	40.7725	BL	1138.13	11.027	114.182	21.7063	BL	BL	BL	1.07018	15.8673	0.930133	0.828865	16.2085	BL	BL	5.87463	1.61688	BL	BL	BL	3.9548	91.5533	798.866	76.624	8.72647	2.99151	19.6874	2.66601	126.446	2529.59	75.8127	BL	7.99764	10.4952	BL	11.4079	22.1493	BL	0.0794482	7.62934	2.41948
2011-03-21	10.5776	2369.63	423.38	1946.25	162.869	24.3592	45.6944	108.278	BL	1366.22	13.2649	127.803	46.0344	4.11706	6.07065	BL	BL	31.0568	2.15726	0.870551	6.33256	BL	BL	5.8549	BL	BL	BL	BL	BL	256.133	1142.88	117.978	34.9345	93.3886	114.317	15.4632	266.417	4308.66	115.746	BL	4.38284	6.22384	BL	9.90516	39.0616	BL
2011-03-23	10.5772	NA	NA	NA	NA	NA	NA	NA	NA	NA	NA	NA	NA	NA	NA	NA	NA	NA	NA	NA	NA	NA	NA	NA	NA	NA	NA	NA	NA	72.524	425.472	144.914	22.7319	74.3255	9.71777	16.9522	152.876	1710.35	87.3151	0.534433	11.6035	9.74592	BL	11.9416	13.1227	BL
2011-03-25	11.5393	NA	NA	NA	NA	NA	NA	NA	NA	NA	NA	NA	NA	NA	NA	NA	NA	NA	NA	NA	NA	NA	NA	NA	NA	NA	NA	NA	NA	101.04	670.205	112.169	21.0016	66.4854	15.1588	7.8168	122.564	2627.29	70.7655	0.701568	7.2718	4.99986	BL	6.48404	22.7434	BL	0.108302	105.966	2.89496
[truncated: 11 more columns]
